# Supplementary material for: Biocatalytic and chemical derivatization of the fungal meroditerpenoid chevalone E
Source: Royal Society of Chemistry journal article supplement (doi:10.1039/d2qo00055e), 2022-01-01
Supplement: d2qo00055e1.pdf [file d2qo00055e1.pdf]

*Supporting Information for*

**Biocatalytic and chemical derivatization of fungal meroditerpenoid chevalone E**

Zong-Hua Xiao,<sup>‡a</sup> Jia-Yu Dong,<sup>‡a</sup> Ao Li,<sup>‡b</sup> Yan-Ping Li,<sup>c</sup> Qiu-Fen Hu,<sup>a</sup> Li-Dong Shao,<sup>\*c</sup> Yudai Matsuda,<sup>\*d</sup> and  
Wei-Guang Wang<sup>\*a</sup>

<sup>a</sup> Key Laboratory of Chemistry in Ethnic Medicinal Resources, State Ethnic Affairs Commission and Ministry of Education and Key Laboratory of Natural Products Synthetic Biology of Ethnic Medicinal Endophytes, State Ethnic Affairs Commission, Yunnan Minzu University, Kunming 650031, China.

<sup>b</sup> Clinical Research Center, Affiliated Hospital of Guangdong Medical University, Zhanjiang 524001, China

<sup>c</sup> Yunnan Key Laboratory of Southern Medicinal Utilization, School of Chinese Materia Medica, Yunnan University of Chinese Medicine, Kunming 650500, China.

<sup>d</sup> Department of Chemistry, City University of Hong Kong, Tat Chee Avenue, Kowloon, Hong Kong SAR, China.

**Table of Contents**

|                                     |         |
|-------------------------------------|---------|
| <b>Supplementary Methods</b>        | S2-S3   |
| <b>Supplementary Tables S1-S12</b>  | S4-S15  |
| <b>Supplementary Figures S1-S48</b> | S16-S63 |
| <b>Supplementary References</b>     | S64     |

## Supplementary Methods

### Isolation and Purification of Each Metabolite

#### Purification conditions for chevalone F (**9**):

The extract from *A. oryzae* NSAR1 with *cle1*, *cle3*, *cle5*, *cle6*, *cle7*, and *olcF'* was subjected to silica-gel column chromatography and eluted stepwise using a dichloromethane: acetone gradient (100:0 to 50:50). Fractions that contained **9** were further purified by reverse-phase preparative HPLC (70% aqueous acetonitrile, 3.0 mL/min,  $t_R = 20$  min), to yield 7.0 mg of a white solid:  $[\alpha]_D^{20} -89.3$  ( $c$  0.1,  $\text{CHCl}_3$ ); for UV spectrum see Figure S1; for  $^1\text{H}$  and  $^{13}\text{C}$  NMR data see Table S5 and Figures S3 and S4; HRMS found  $m/z$  413.2675  $[\text{M} + \text{H}]^+$  (calcd 413.2686 for  $\text{C}_{26}\text{H}_{37}\text{O}_4$ ). The NMR data were in good agreement with the reported data.<sup>1</sup>

#### Purification conditions for chevalone N (**10**):

The extract from *A. oryzae* NSAR1 with *cle1*, *cle2*, *cle3*, *cle5*, *cle6*, *cle7*, and *olcF'* was subjected to silica-gel column dichloromethane and eluted stepwise using a dichloromethane: acetone gradient (100:0 to 50:50). Fractions that contained **10** were further purified by reverse-phase preparative HPLC (65% aqueous acetonitrile, 3.0 mL/min,  $t_R = 8.6$  min), to yield 3.6 mg of a white solid:  $[\alpha]_D^{20} -87.3$  ( $c$  0.1,  $\text{CH}_3\text{OH}$ ); for UV spectrum see Figure S1; for  $^1\text{H}$  and  $^{13}\text{C}$  NMR data see Table S6 and Figures S5-S10; HRMS found  $m/z$  429.2618  $[\text{M} + \text{H}]^+$  (calcd 429.2636 for  $\text{C}_{26}\text{H}_{37}\text{O}_5$ ).

#### Purification conditions for chevalone O (**11**):

The extract from *A. oryzae* NSAR1 with *cle1*, *cle3*, *cle4*, *cle5*, *cle6*, *cle7*, and *olcF'* was purified by reverse-phase preparative HPLC with a solvent system of water (solvent A) and acetonitrile (solvent B) at a flow rate of 3.0 mL/min. Separation was performed with solvent B/solvent A using a linear gradient from 10:90 to 100:0 for 30 min ( $t_R = 23.5$  min), which yielded 5.1 mg of a white solid:  $[\alpha]_D^{20} -78.7$  ( $c$  0.1,  $\text{CH}_3\text{OH}$ ); for UV spectrum see Figure S1; for  $^1\text{H}$  and  $^{13}\text{C}$  NMR data see Table S7 and Figures S11-S16; HRMS found  $m/z$  429.2647  $[\text{M} + \text{H}]^+$  (calcd 429.2636 for  $\text{C}_{26}\text{H}_{37}\text{O}_5$ ).

#### Purification conditions for chevalone P (**12**):

The extract from *A. oryzae* NSAR1 with *cle1*, *cle3*, *cle4*, *cle5*, *cle6*, *cle7*, and *olcF'* was purified by reverse-phase preparative HPLC with a solvent system of water (solvent A) and acetonitrile (solvent B) at a flow rate of 3.0 mL/min. Separation was performed with solvent B/solvent A using a linear gradient from 10:90 to 100:0 for 30 min ( $t_R = 15.1$  min), which yielded 14.1 mg of a white solid:  $[\alpha]_D^{20} -106.3$  ( $c$  0.2,  $\text{CH}_3\text{OH}$ ); for UV spectrum see Figure S1; for  $^1\text{H}$  and  $^{13}\text{C}$  NMR data see Table S8 and Figures S17-S22; HRMS found  $m/z$  445.2605  $[\text{M} + \text{H}]^+$  (calcd 445.2585 for  $\text{C}_{26}\text{H}_{37}\text{O}_6$ ).

#### Purification conditions for chevalone Q (**13**):

The extract from *A. oryzae* NSAR1 with *cle1*, *cle2*, *cle3*, *cle4*, *cle5*, *cle6*, *cle7*, and *olcF'* was subjected to silica-gel column dichloromethane and eluted stepwise using a dichloromethane: acetone gradient (100:0 to 50:50). Fractions that contained **13** were further purified by reverse-phase preparative HPLC (40% aqueous acetonitrile, 3.0 mL/min,  $t_R$  = 13.2 min), to yield 8.0 mg of a white solid:  $[\alpha]_D^{20}$  -14.0 (c 0.05, CH<sub>3</sub>OH); for UV spectrum see Figure S1; for <sup>1</sup>H and <sup>13</sup>C NMR data see Table S9 and Figures S23-S28; HRMS found  $m/z$  445.2583 [M + H]<sup>+</sup> (calcd 445.2585 for C<sub>26</sub>H<sub>37</sub>O<sub>6</sub>).

#### Purification conditions for chevalone R (**14**):

The extract from *A. oryzae* NSAR1 with *cle1*, *cle2*, *cle3*, *cle4*, *cle5*, *cle6*, *cle7*, and *olcF'* was subjected to silica-gel column dichloromethane and eluted stepwise using a dichloromethane: acetone gradient (100:0 to 50:50). Fractions that contained **14** were further purified by reverse-phase preparative HPLC (30% aqueous acetonitrile, 3.0 mL/min,  $t_R$  = 16.0 min), to yield 1.6 mg of a white solid:  $[\alpha]_D^{20}$  -26.7 (c 0.05, CH<sub>3</sub>OH); for UV spectrum see Figure S1; for <sup>1</sup>H and <sup>13</sup>C NMR data see Table S10 and Figures S29-S34; HRMS found  $m/z$  461.2515 [M + H]<sup>+</sup> (calcd 461.2534 for C<sub>26</sub>H<sub>37</sub>O<sub>7</sub>).

#### Purification conditions for chevalone S (**15**):

The *A. oryzae* NSAR1 transformant harboring *cle1+2+3+5+6+7* was cultivated in 200 ml of DPY medium at 30 °C and 200 rpm for 72 h, in the presence of 5 mg of **11**. After the incubation, the extract was subjected to silica-gel column dichloromethane and eluted stepwise using a dichloromethane: acetone gradient (100:0 to 50:50). Fractions that contained **15** were further purified by reverse-phase preparative HPLC (60% aqueous acetonitrile, 3.0 mL/min,  $t_R$  = 7.2 min), to yield 1.5 mg of a white solid; for UV spectrum see Figure S1; HRMS found  $m/z$  441.2275 [M + H]<sup>+</sup> (calcd 441.2277 for C<sub>26</sub>H<sub>33</sub>O<sub>6</sub>); <sup>1</sup>H NMR (400 MHz, pyridine-*d*<sub>5</sub>)  $\delta_H$  6.23 (brs, 1H), 5.01 (dd,  $J$  = 7.6, 3.5 Hz, 1H), 2.82 – 2.61 (m, 3H), 2.46 – 2.28 (m, 3H), 2.06 (s, 3H), 1.59 (s, 3H), 1.39 (s, 3H), 1.19 (s, 3H), 1.00 (s, 3H); <sup>13</sup>C NMR (100 MHz, pyridine-*d*<sub>5</sub>)  $\delta_C$  213.6 s, 180.2 s, 177.6 s, 163.3 s, 161.2 s, 112.9 d, 100.2 s, 83.3 s, 75.2 d, 56.9 d, 49.3 d, 48.6 d, 48.1 s, 47.5 s, 39.5 t, 34.7 t, 34.4 t, 34.0 s, 33.5 t, 27.3 q, 25.3 q, 21.7 q, 20.2 t, 19.3 q, 16.6 q, 16.5 t; for NMR data see Figures S35 and S36.

#### Purification conditions for chevalone T (**16**):

The extract from *A. oryzae* NSAR1 with *cle1*, *cle2*, *cle3*, *cle4*, *cle5*, *cle6*, *cle7*, and *olcF'* was subjected to silica-gel column dichloromethane and eluted stepwise using a dichloromethane: acetone gradient (100:0 to 50:50). Fractions that contained **16** were further purified by reverse-phase preparative HPLC (45% aqueous acetonitrile, 3.0 mL/min,  $t_R$  = 6.0 min), to yield 2.3 mg of a white solid:  $[\alpha]_D^{20}$  -72.0 (c 0.05, CH<sub>3</sub>OH); for UV spectrum see Figure S1; for <sup>1</sup>H and <sup>13</sup>C NMR data see Table S11 and Figures S37-S42; HRMS found  $m/z$  457.2227 [M + H]<sup>+</sup> (calcd 457.2221 for C<sub>26</sub>H<sub>33</sub>O<sub>7</sub>).

### Chemical synthesis of **17** from **10**:

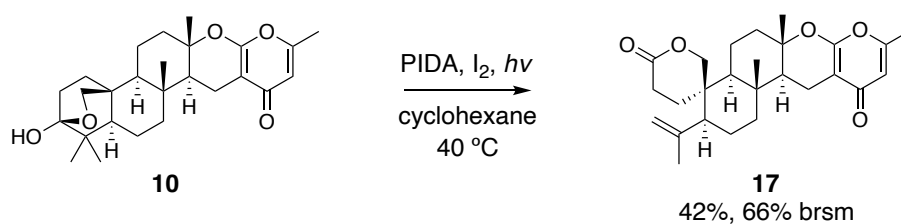

According to the literature,<sup>2</sup> to a suspension of **10** (10 mg, 0.02 mmol), (diacetoxyiodo)benzene (PIDA) (12 mg, 0.03 mmol), and I<sub>2</sub> (6 mg, 0.02 mmol) in cyclohexane (5 mL) was irradiated with a tungsten-filament lamp (250 W) at 40 °C under an argon atmosphere for 8 h. The reaction was diluted with dichloromethane (15 mL) and quenched by saturated aqueous solution of Na<sub>2</sub>S<sub>2</sub>O<sub>3</sub> (0.8 mL). The organic layer was washed with brine (10 mL × 3), dried over Na<sub>2</sub>SO<sub>4</sub>, and concentrated. The residue was purified by preparative HPLC (65% aqueous acetonitrile, 3.0 mL/min, *t*<sub>R</sub> = 10.5 min), to give 4.2 mg of **17** (42% yields, 66% brsm.) with a white solid: [α]<sup>18</sup><sub>D</sub> -132.3 (*c* 0.1, CHCl<sub>3</sub>); for UV spectrum see Figure S1; for <sup>1</sup>H and <sup>13</sup>C NMR data see Table S12 and Figures S43-S48; HRMS found *m/z* 427.2464 [M + H]<sup>+</sup> (calcd 427.2479 for C<sub>26</sub>H<sub>35</sub>O<sub>5</sub>).

Table S1. Annotation of each protein encoded by the *olc'* cluster.

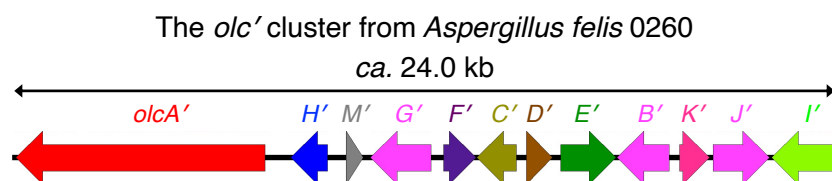

| Gene         | Amino acids (base pairs) | Protein homologue, origin          | Similarity/identity (%) | Proposed function                         |
|--------------|--------------------------|------------------------------------|-------------------------|-------------------------------------------|
| <i>olcA'</i> | 2442 (7329)              | OlcA, <i>Penicillium canescens</i> | 57/42                   | polyketide synthase                       |
| <i>olcB'</i> | 1534 (493)               | OlcB, <i>Penicillium canescens</i> | 75/57                   | cytochrome P450 monooxygenase             |
| <i>olcC'</i> | 1167 (335)               | OlcC, <i>Penicillium canescens</i> | 82/67                   | geranylgeranyl pyrophosphate synthase     |
| <i>olcD'</i> | 768 (236)                | OlcD, <i>Penicillium canescens</i> | 69/55                   | terpene cyclase                           |
| <i>olcE'</i> | 1626 (501)               | OlcE, <i>Penicillium canescens</i> | 64/51                   | FAD-dependent monooxygenase               |
| <i>olcF'</i> | 948 (257)                | OlcF, <i>Penicillium canescens</i> | 79/65                   | short-chain dehydrogenase/reductase       |
| <i>olcG'</i> | 1781 (521)               | OlcG, <i>Penicillium canescens</i> | 71/55                   | cytochrome P450 monooxygenase             |
| <i>olcH'</i> | 1069 (321)               | OlcH, <i>Penicillium canescens</i> | 79/63                   | prenyltransferase                         |
| <i>olcI'</i> | 1812 (572)               | OlcI, <i>Penicillium canescens</i> | 68/54                   | CoA ligase                                |
| <i>olcJ'</i> | 1652 (511)               | OlcJ, <i>Penicillium canescens</i> | 79/63                   | cytochrome P450 monooxygenase             |
| <i>olcK'</i> | 876 (291)                | OlcK, <i>Penicillium canescens</i> | 75/59                   | Fe(II)/ $\alpha$ KG-dependent dioxygenase |
| <i>olcM'</i> | 504 (167)                | LnaC, <i>Aspergillus flavus</i>    | 47/23                   | truncated cytochrome P450 monooxygenase   |

Table S2. Primers used in this study.

| Primer              | Sequence (5' to 3')                         |
|---------------------|---------------------------------------------|
| InF-adeA-SpeI-F     | TTACCTAGAGGATCTACTAGCGACTCCAATCTTCAAGAGC    |
| InF-adeA-SpeI-R     | TCCCCAATCCATATGACTAGGTAAGATACATGAGCTTCGGTG  |
| olcF'-F             | CCCACAGCAAGCTCCGAATTATGGGCTGTCTCCAGAATCGCG  |
| olcF'-R             | CCGGGTACCGAGCTCGAATTTTATATAGTAGACCAGCCATCGT |
| olcB'-F             | CCCACAGCAAGCTCCGAATTATGATGGCCCTTGTGCTCTG    |
| olcB'-R             | CCGGGTACCGAGCTCGAATTTCTAATTACCTTTGCCCTTCCC  |
| InF-PamyB-F         | TGCCTGCAGGTCGACTCTAGACGACTCCAATCTTCAAGAGC   |
| InF-TamyB-R         | ATGACTAGTAGATCCTCTAGGTAAGATACATGAGCTTCGGTG  |
| InF-linker-F1       | TTGCTCGCGAGCGCGTTCCACTGCATCATCAGTCTAGA      |
| InF-linker-R1       | TGGAACGCGCTCGCGAGCAAGTACCATACAGTACCGCG      |
| InF-pBARI-F         | TGATTACGCCAAGCTTCGACTCCAATCTTCAAGAGC        |
| InF-pBARI-R         | GCAGGCATGCAAGCTTGTAAGATACATGAGCTTCG         |
| pET28a-olcF'-NcoI-F | AGAAGGAGATATACCATGGGCTGTCTCCAGAATCGC        |
| pET28a-olcF'-XhoI-R | GGTGGTGGTGCTCGTATATAGTAGACCAGCCATCGT        |

Table S3. Plasmids constructed in this study and PCR conditions for the amplification of the inserts for the plasmid constructions.

| Plasmid          | Vector                                           | Insert                   | Primer 1            | Primer 2            | PCR Template         |
|------------------|--------------------------------------------------|--------------------------|---------------------|---------------------|----------------------|
| pTAex3-olcF'     | pTAex3 digested with <i>EcoRI</i>                | <i>olcF'</i>             | olcF'-F             | olcF'-R             | <i>A. felis</i> gDNA |
| pTAex3-olcB'     | pTAex3 digested with <i>EcoRI</i>                | <i>olcB'</i>             | olcB'-F             | olcB'-R             | <i>A. felis</i> gDNA |
| pET28a-olcF'     | pET28a digested with <i>NcoI</i> and <i>XhoI</i> | <i>olcF'</i>             | pET28a-olcF'-NcoI-F | pET28a-olcF'-XhoI-R | <i>A. felis</i> cDNA |
| pAdeA-cle1+5+6   | pAdeA-cle5+6 digested with <i>SpeI</i>           | <i>PamyB-cle1-TamyB</i>  | InF-adeA-SpeI-F     | InF-adeA-SpeI-R     | pTAex3-cle1          |
| pBARI-cle2+olcF' | pBARI digested with <i>HindIII</i>               | <i>PamyB-cle2-TamyB</i>  | InF-pBARI-F         | InF-linker-R1       | pTAex3-cle2          |
|                  |                                                  | <i>PamyB-olcF'-TamyB</i> | InF-linker-F1       | InF-pBARI-R         | pTAex3-olcF'         |
| pBARI-cle4+olcF' | pBARI digested with <i>HindIII</i>               | <i>PamyB-cle4-TamyB</i>  | InF-pBARI-F         | InF-linker-R1       | pTAex3-cle4          |
|                  |                                                  | <i>PamyB-olcF'-TamyB</i> | InF-linker-F1       | InF-pBARI-R         | pTAex3-olcF'         |

Table S4. *Aspergillus oryzae* NSAR1 transformants constructed in this study.

| Strain                                            | Plasmids used for transformation                                                               |
|---------------------------------------------------|------------------------------------------------------------------------------------------------|
| <i>A. oryzae</i> / <i>cle1+3+5+6+7</i>            | pAdeA- <i>cle1+5+6</i> ; pUSA- <i>cle3+7</i>                                                   |
| <i>A. oryzae</i> / <i>cle1+3+5+6+7+olcF'</i>      | pAdeA- <i>cle1+5+6</i> ; pUSA- <i>cle3+7</i> ; pTAex3- <i>olcF'</i>                            |
| <i>A. oryzae</i> / <i>cle1+2+3+5+6+7+olcF'</i>    | pAdeA- <i>cle1+5+6</i> ; pUSA- <i>cle3+7</i> ; pBARI- <i>cle2+olcF'</i>                        |
| <i>A. oryzae</i> / <i>cle1+3+4+5+6+7+olcF'</i>    | pAdeA- <i>cle1+5+6</i> ; pUSA- <i>cle3+7</i> ; pBARI- <i>cle4+olcF'</i>                        |
| <i>A. oryzae</i> / <i>cle1+2+3+4+5+6+7+olcF'</i>  | pAdeA- <i>cle1+5+6</i> ; pUSA- <i>cle3+7</i> ; pBARI- <i>cle2+olcF'</i> ; pTAex3- <i>cle4</i>  |
| <i>A. oryzae</i> / <i>cle1+2+3+5+6+7+olcB'+F'</i> | pAdeA- <i>cle1+5+6</i> ; pUSA- <i>cle3+7</i> ; pBARI- <i>cle2+olcF'</i> ; pTAex3- <i>olcB'</i> |

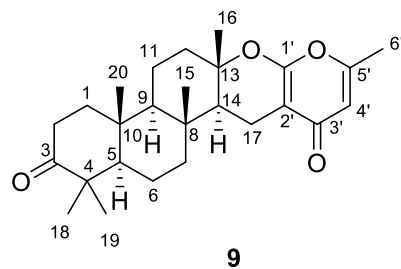

Table S5. NMR data for chevalone F (**9**) ( $^1\text{H}$  NMR:400 MHz,  $^{13}\text{C}$  NMR: 100 MHz,  $\delta$  in ppm, recorded in  $\text{CDCl}_3$ ).

| position | $^{13}\text{C}$ | $^1\text{H}$   |                         |           |
|----------|-----------------|----------------|-------------------------|-----------|
|          | $\delta$ (ppm)  | $\delta$ (ppm) | Multiplicity            | intensity |
| 1        | 39.2 t          | 1.48           | overlap                 | 1H        |
| 2        | 34.0 t          | 1.97           | overlap                 | 1H        |
|          |                 | 2.50           | m                       | 2H        |
|          |                 |                |                         |           |
| 3        | 217.5 s         |                |                         |           |
| 4        | 47.4 s          |                |                         |           |
| 5        | 54.8 d          | 1.43 $\alpha$  | overlap                 | 1H        |
| 6        | 19.2 t          | 1.39           | overlap                 | 1H        |
|          |                 | 1.57           | overlap                 | 1H        |
|          |                 |                |                         |           |
| 7        | 40.3 t          | 1.08           | overlap                 | 1H        |
|          |                 | 1.95           | overlap                 | 1H        |
|          |                 |                |                         |           |
| 8        | 37.4 s          |                |                         |           |
| 9        | 59.7 d          | 0.95           | overlap                 | 1H        |
| 10       | 36.9 s          |                |                         |           |
| 11       | 19.3 t          | 1.42           | overlap                 | 1H        |
|          |                 | 1.73           | overlap                 | 1H        |
|          |                 |                |                         |           |
| 12       | 40.2 t          | 1.71           | overlap                 | 1H        |
|          |                 | 2.12           | d ( $J = 6.3$ Hz)       | 1H        |
|          |                 |                |                         |           |
| 13       | 84.2 s          |                |                         |           |
| 14       | 52.3 d          | 1.51 $\alpha$  | overlap                 | 1H        |
| 15       | 15.5 t          | 2.15           | dd ( $J = 7.0, 3.4$ Hz) | 1H        |
|          |                 | 2.55           | m                       | 1H        |
|          |                 |                |                         |           |
| 16       | 20.7 q          | 1.30 $\beta$   | d ( $J = 0.8$ Hz)       | 3H        |
| 17       | 15.8 q          | 0.92 $\beta$   | s                       | 3H        |
| 18       | 16.3 q          | 0.93 $\beta$   | s                       | 3H        |
| 19       | 26.8 q          | 1.01 $\alpha$  | d ( $J = 2.2$ Hz)       | 3H        |
| 20       | 21.0 q          | 1.04 $\beta$   | s                       | 3H        |
| 1'       | 180.7 s         |                |                         |           |
| 2'       | 98.5 s          |                |                         |           |
| 3'       | 162.7 s         |                |                         |           |
| 4'       | 112.0 d         | 5.99           | d ( $J = 1.0$ Hz)       | 1H        |
| 5'       | 160.7 s         |                |                         |           |
| 6'       | 19.4 q          | 2.20           | d ( $J = 0.9$ Hz Hz)    | 3H        |



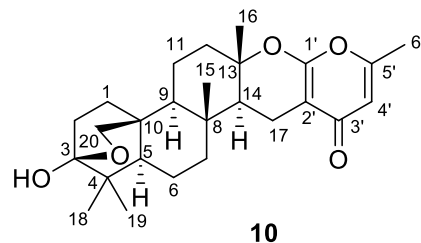

Table S6. NMR data for chevalone N (**10**) ( $^1\text{H}$  NMR: 600 MHz,  $^{13}\text{C}$  NMR: 150 MHz,  $\delta$  in ppm, recorded in pyridine- $d_5$ ).

| position | $^{13}\text{C}$ |                | $^1\text{H}$              |           |                                  |                                                             |                                                                                            |
|----------|-----------------|----------------|---------------------------|-----------|----------------------------------|-------------------------------------------------------------|--------------------------------------------------------------------------------------------|
|          | $\delta$ (ppm)  | $\delta$ (ppm) | Multiplicity              | intensity | HMBC correlation                 | COSY correlation                                            | NOESY correlation                                                                          |
| 1        | 35.7 t          | 1.09 $\alpha$  | dd ( $J = 10.3, 7.6$ Hz)  | 1H        | 2, 3, 5, 9, 10, 20               | H-1 $\beta$ , H-2 $\alpha$                                  | H-1 $\beta$ , H-2 $\alpha$ , H-9 $\alpha$                                                  |
|          |                 | 2.22 $\beta$   | dt ( $J = 12.5, 4.2$ Hz)  | 1H        | 2, 3, 5, 10, 20                  | H-1 $\alpha$ , H-2 $\alpha$ , H-2 $\beta$                   | H-1 $\alpha$ , H-11 $\beta$ , H-20 $\alpha$ , H-20 $\beta$                                 |
| 2        | 30.9 t          | 2.11 $\alpha$  | dd ( $J = 12.5, 3.3$ Hz)  | 1H        | 1, 3, 4, 10                      | H-1 $\alpha$ , H-1 $\beta$                                  | H-2 $\beta$                                                                                |
|          |                 | 2.37 $\beta$   | td ( $J = 12.5, 5.5$ Hz)  | 1H        | 1, 3, 4, 10                      | H-1 $\alpha$ , H-1 $\beta$                                  | H-2 $\alpha$ , H-19 $\alpha$                                                               |
| 3        | 98.5 s          |                |                           |           |                                  |                                                             |                                                                                            |
| 4        | 41.3 s          |                |                           |           |                                  |                                                             |                                                                                            |
| 5        | 49.9 d          | 1.27 $\alpha$  | dd ( $J = 8.9, 5.4$ Hz)   | 1H        | 1, 3, 4, 6, 7, 9, 10, 18, 19, 20 | H-6 $\alpha$ , H-6 $\beta$                                  | H-6 $\alpha$ , H-7 $\alpha$ , H-9 $\alpha$ , H $_3$ -19 $\alpha$                           |
|          |                 | 1.12 $\alpha$  | overlap                   | 1H        | 4, 5, 7, 8, 10                   | H-5 $\alpha$ , H-6 $\beta$ , H-7 $\alpha$ , H-7 $\beta$     | H-5 $\alpha$ , H-6 $\beta$ , H-7 $\beta$                                                   |
| 6        | 20.1 t          | 1.03 $\beta$   | overlap                   | 1H        | 4, 5, 7, 10                      | H-5 $\alpha$ , H-6 $\alpha$ , H-7 $\alpha$ , H-7 $\beta$    | H-6 $\alpha$ , H-7 $\alpha$ , H $_3$ -15 $\beta$                                           |
|          |                 | 1.69 $\alpha$  | overlap                   | 1H        | 6, 9, 14                         | H-6 $\alpha$ , H-6 $\beta$ , H-7 $\beta$                    | H-6 $\alpha$ , H-7 $\alpha$                                                                |
| 7        | 38.6 t          | 0.92 $\beta$   | dd ( $J = 5.5, 3.5$ Hz)   | 1H        | 5, 6, 8, 9, 15                   | H-6 $\alpha$ , H-6 $\beta$ , H-7 $\alpha$                   | H-6 $\alpha$ , H-7 $\beta$ , H $_3$ -15 $\beta$                                            |
|          |                 |                |                           |           |                                  |                                                             |                                                                                            |
| 8        | 36.9 s          |                |                           |           |                                  |                                                             |                                                                                            |
| 9        | 54.8 d          | 1.01 $\alpha$  | overlap                   | 1H        | 1, 5, 8, 10, 11, 12, 14, 15, 20  | H-11 $\beta$                                                | H-1 $\alpha$ , H-5 $\alpha$ , H-7 $\alpha$ , H-11 $\alpha$ , H-12 $\alpha$ , H-14 $\alpha$ |
| 10       | 36.1 s          |                |                           |           |                                  |                                                             |                                                                                            |
|          |                 |                |                           |           |                                  |                                                             |                                                                                            |
| 11       | 19.9 t          | 1.70 $\alpha$  | overlap                   | 1H        | 8, 9, 10, 12, 13                 | H-11 $\beta$ , H-12 $\beta$                                 | H-9 $\alpha$ , H-11 $\beta$ , H-12 $\alpha$                                                |
|          |                 | 1.48 $\beta$   | m                         | 1H        | 8, 9, 12, 13                     | H-9 $\alpha$ , H-11 $\alpha$ , H-12 $\alpha$ , H-12 $\beta$ | H-11 $\alpha$ , H $_3$ -15 $\beta$                                                         |
| 12       | 40.9 t          | 2.02 $\alpha$  | d ( $J = 3.8$ Hz)         | 1H        | 9, 11, 13, 14, 16                | H-11 $\beta$ , H-12 $\beta$                                 | H-9 $\alpha$ , H-11 $\alpha$ , H-14 $\alpha$                                               |
|          |                 | 1.67 $\beta$   | overlap                   | 1H        | 9, 11, 13, 14, 16                | H-11 $\alpha$ , H-11 $\beta$ , H-12 $\alpha$                | H-11 $\beta$ , H $_3$ -16 $\beta$                                                          |
| 13       | 84.2 s          |                |                           |           |                                  |                                                             |                                                                                            |
| 14       | 52.2 d          | 1.45 $\alpha$  | dd ( $J = 12.7, 4.9$ Hz)  | 1H        | 7, 8, 9, 12, 13, 15, 16, 17, 2'  | H-17 $\alpha$ , H-17 $\beta$                                | H-9 $\alpha$ , H-12 $\alpha$ , H-17 $\alpha$                                               |
| 15       | 14.9 q          | 0.69 $\beta$   | s                         | 3H        | 7, 8, 9, 14                      |                                                             | H-7 $\beta$ , H $_3$ -16 $\beta$ , H-17 $\beta$ , H-20 $\alpha$ , H-20 $\beta$             |
|          |                 | 1.18 $\beta$   | s                         | 3H        | 12, 13, 14                       |                                                             | H-11 $\beta$ , H-12 $\beta$ , H $_3$ -15 $\beta$ , H-17 $\beta$                            |
| 17       | 16.6 t          | 2.79 $\alpha$  | dd ( $J = 16.3, 4.9$ Hz)  | 1H        | 8, 13, 14, 1', 2', 3'            | H-14 $\alpha$ , H-17 $\beta$                                | H-14 $\alpha$ , H-17 $\beta$                                                               |
|          |                 | 2.27 $\beta$   | dd ( $J = 16.3, 12.7$ Hz) | 1H        | 8, 13, 14, 1', 2', 3'            | H-14 $\alpha$ , H-17 $\alpha$                               | H $_3$ -15 $\beta$ , H $_3$ -16 $\beta$ , H-17 $\alpha$                                    |
| 18       | 19.9 q          | 1.32 $\beta$   | s                         | 3H        | 3, 4, 5, 19                      |                                                             | H-2 $\beta$ , H-6 $\beta$ , H $_3$ -19 $\alpha$ , H-20 $\alpha$ , H-20 $\beta$             |
|          |                 | 1.25 $\alpha$  | s                         | 3H        | 3, 4, 5, 18                      |                                                             | H-5 $\alpha$ , H-6 $\alpha$ , H $_3$ -18 $\beta$                                           |
| 20       | 67.9 t          | 4.26 $\alpha$  | dd ( $J = 8.7, 2.8$ Hz)   | 1H        | 1, 3, 5, 9, 10                   |                                                             | H-1 $\beta$ , H-6 $\beta$ , H-11 $\beta$ , H $_3$ -15 $\beta$ , H $_3$ -18 $\beta$         |
|          |                 | 3.83 $\beta$   | dd ( $J = 8.7, 2.0$ Hz)   | 1H        | 1, 3, 5, 9, 10                   |                                                             | H-1 $\beta$ , H-6 $\beta$ , H-11 $\beta$ , H $_3$ -15 $\beta$ , H $_3$ -18 $\beta$         |
| 1'       | 163.1 s         |                |                           |           |                                  |                                                             |                                                                                            |
| 2'       | 99.1 s          |                |                           |           |                                  |                                                             |                                                                                            |
| 3'       | 180.3 s         |                |                           |           |                                  |                                                             |                                                                                            |
| 4'       | 112.7 d         | 6.20           | s                         | 1H        | 2', 3', 5', 6'                   |                                                             | H $_3$ -6'                                                                                 |
| 5'       | 161.1 s         |                |                           |           |                                  |                                                             |                                                                                            |
| 6'       | 19.3 q          | 2.04           | s                         | 3H        | 4', 5'                           |                                                             | H-4'                                                                                       |

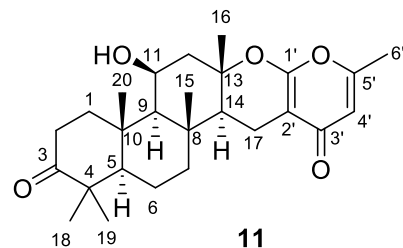

Table S7. NMR data for chevalone O (**11**) ( $^1\text{H}$  NMR: 600 MHz,  $^{13}\text{C}$  NMR: 150 MHz,  $\delta$  in ppm, recorded in  $\text{CDCl}_3$ ).

| position | $^{13}\text{C}$ |                               | $^1\text{H}$                        |           |                                            |                                                               |                                                                                                                                   |
|----------|-----------------|-------------------------------|-------------------------------------|-----------|--------------------------------------------|---------------------------------------------------------------|-----------------------------------------------------------------------------------------------------------------------------------|
|          | $\delta$ (ppm)  | $\delta$ (ppm)                | Multiplicity                        | intensity | HMBC correlation                           | COSY correlation                                              | NOESY correlation                                                                                                                 |
| 1        | 39.1 t          | 1.49 $\alpha$<br>2.13 $\beta$ | m<br>m                              | 1H<br>1H  | 2, 3, 5, 10, 20<br>2, 3, 5, 9, 10          | H-1 $\beta$ , H-2 $\alpha$<br>H-1 $\alpha$ , H-2 $\beta$      | H-1 $\beta$ , H-2 $\alpha$ , H-9 $\alpha$<br>H-1 $\alpha$ , H-2 $\beta$ , H <sub>3</sub> -20 $\beta$                              |
| 2        | 34.1 t          | 2.44 $\alpha$<br>2.66 $\beta$ | ddd ( $J = 15.9, 7.0, 3.6$ Hz)<br>m | 1H<br>1H  | 1, 3, 4, 10<br>1, 3, 4, 10                 | H-1 $\alpha$<br>H-1 $\beta$                                   | H-1 $\beta$<br>H-1 $\alpha$ , H-2 $\beta$                                                                                         |
| 3        | 217.3 s         |                               |                                     |           |                                            |                                                               |                                                                                                                                   |
| 4        | 47.5 s          |                               |                                     |           |                                            |                                                               |                                                                                                                                   |
| 5        | 56.1 d          | 1.33 $\alpha$                 | dd ( $J = 12.4, 2.5$ Hz)            | 1H        | 1, 4, 7, 8, 9, 10, 18, 19, 20              | H-6 $\beta$                                                   | H-6 $\alpha$ , H-9 $\alpha$ , H <sub>3</sub> -19 $\alpha$                                                                         |
| 6        | 19.6 t          | 1.71 $\alpha$<br>1.57 $\beta$ | m<br>m                              | 1H<br>1H  | 4, 5, 7, 8, 10<br>4, 5, 7, 10              | H-6 $\beta$<br>H-5 $\alpha$ , H-6 $\alpha$ , H-7 $\alpha$     | H-5 $\alpha$ , H-6 $\beta$ , H-7 $\beta$<br>H-6 $\alpha$                                                                          |
| 7        | 42.6 t          | 1.94 $\alpha$<br>1.05 $\beta$ | dd ( $J = 5.4, 3.0$ Hz)<br>overlap  | 1H<br>1H  | 5, 6, 8, 14, 15<br>5, 6, 8, 9, 15          | H-6 $\beta$ , H-7 $\beta$<br>H-6 $\alpha$ , H-7 $\alpha$      | H-5 $\alpha$ , H-6 $\alpha$ , H-6 $\beta$ , H-7 $\beta$<br>H-6 $\alpha$ , H-6 $\beta$ , H-7 $\alpha$ , H <sub>3</sub> -15 $\beta$ |
| 8        | 37.7 s          |                               |                                     |           |                                            |                                                               |                                                                                                                                   |
| 9        | 60.3 d          | 0.99 $\alpha$                 | s                                   | 1H        | 1, 5, 8, 10, 11, 12, 14, 15, 20            | H-11 $\alpha$                                                 | H-1 $\alpha$ , H-5 $\alpha$ , H-14 $\alpha$                                                                                       |
| 10       | 37.9 s          |                               |                                     |           |                                            |                                                               |                                                                                                                                   |
| 11       | 67.6 d          | 4.66 $\alpha$                 | s                                   | 1H        | 8, 9, 12, 13                               | H-9 $\alpha$ , H-11 $\beta$                                   | H-9 $\alpha$ , H-12 $\alpha$ , H-12 $\beta$                                                                                       |
| 12       | 48.5 t          | 2.26 $\alpha$<br>1.91 $\beta$ | dd ( $J = 8.3, 5.6$ Hz)<br>overlap  | 1H<br>1H  | 9, 13, 16<br>9, 13, 14, 16                 | H-12 $\beta$<br>H-11 $\beta$                                  | H-9 $\alpha$ , H-11 $\alpha$ , H-14 $\alpha$<br>H-12 $\alpha$ , H <sub>3</sub> -16 $\beta$                                        |
| 13       | 84.1 s          |                               |                                     |           |                                            |                                                               |                                                                                                                                   |
| 14       | 53.0 d          | 1.53 $\alpha$                 | m                                   | 1H        | 7, 8, 9, 12, 15, 16, 17, 2'                | H-17 $\alpha$ , H-17 $\beta$                                  | H-9 $\alpha$ , H-12 $\alpha$ , H-17 $\alpha$                                                                                      |
| 15       | 17.1 q          | 1.30 $\beta$                  | s                                   | 3H        | 7, 8, 9, 14                                |                                                               | H <sub>3</sub> -16 $\beta$ , H-17 $\beta$ , H <sub>3</sub> -20 $\beta$                                                            |
| 16       | 22.0 q          | 1.54 $\beta$                  | s                                   | 3H        | 12, 13, 14                                 |                                                               | H-12 $\beta$ , H <sub>3</sub> -15 $\beta$ , H-17 $\beta$                                                                          |
| 17       | 15.5 t          | 2.61 $\beta$<br>2.29 $\alpha$ | dd ( $J = 16.2, 4.6$ Hz)<br>overlap | 1H<br>1H  | 8, 13, 14, 1', 2', 3'<br>8, 13, 14, 1', 2' | H-14 $\alpha$ , H-17 $\alpha$<br>H-14 $\alpha$ , H-17 $\beta$ | H-7 $\alpha$ , H-17 $\beta$<br>H-7 $\beta$ , H-14 $\alpha$ , H-17 $\alpha$                                                        |
| 18       | 21.3 q          | 1.08 $\beta$                  | s                                   | 3H        | 3, 4, 5, 19                                |                                                               | H-2 $\beta$ , H-6 $\beta$ , H <sub>3</sub> -19 $\alpha$                                                                           |
| 19       | 26.6 q          | 1.07 $\alpha$                 | s                                   | 3H        | 3, 4, 5, 18                                |                                                               | H-3 $\alpha$ , H-5 $\alpha$ , H <sub>3</sub> -18 $\beta$                                                                          |
| 20       | 17.3 q          | 1.37 $\beta$                  | s                                   | 3H        | 1, 5, 9, 10                                |                                                               |                                                                                                                                   |
| 1'       | 162.4 s         |                               |                                     |           |                                            |                                                               |                                                                                                                                   |
| 2'       | 98.8 s          |                               |                                     |           |                                            |                                                               |                                                                                                                                   |
| 3'       | 180.7 s         |                               |                                     |           |                                            |                                                               |                                                                                                                                   |
| 4'       | 112.1 d         | 5.99                          | s                                   | 1H        | 2', 3', 5', 6'                             |                                                               | H <sub>3</sub> -6'                                                                                                                |
| 5'       | 160.7 s         |                               |                                     |           |                                            |                                                               |                                                                                                                                   |
| 6'       | 19.4 q          | 2.21                          | s                                   | 3H        | 4', 5'                                     |                                                               |                                                                                                                                   |

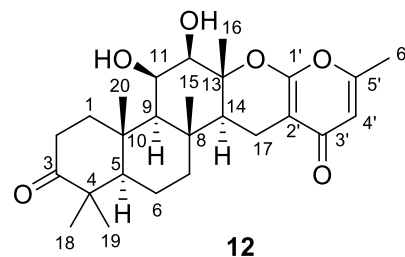

Table S8. NMR data for chevalone P (**12**) ( $^1\text{H}$  NMR: 600 MHz,  $^{13}\text{C}$  NMR: 150 MHz,  $\delta$  in ppm, recorded in pyridine- $d_5$ ).

| position | $^{13}\text{C}$ |                               | $^1\text{H}$                                                      |           |                                         |                                                                                                  |                                                                                                                    |
|----------|-----------------|-------------------------------|-------------------------------------------------------------------|-----------|-----------------------------------------|--------------------------------------------------------------------------------------------------|--------------------------------------------------------------------------------------------------------------------|
|          | $\delta$ (ppm)  | $\delta$ (ppm)                | Multiplicity                                                      | intensity | HMBC correlation                        | COSY correlation                                                                                 | NOESY correlation                                                                                                  |
| 1        | 39.3 t          | 1.36 $\alpha$<br>2.07 $\beta$ | m<br>m                                                            | 1H<br>1H  | 2, 3, 5, 10, 20<br>2, 3, 5, 9, 10, 20   | H-1 $\beta$ , H-2 $\alpha$<br>H-1 $\alpha$ , H-1 $\beta$ , H-2 $\beta$                           | H-1 $\beta$ , H-2 $\alpha$ , H-9 $\alpha$<br>H-1 $\alpha$ , H-2 $\alpha$ , H <sub>3</sub> -20 $\beta$              |
| 2        | 34.7 t          | 2.40 $\alpha$<br>2.65 $\beta$ | ddd ( $J = 15.5, 7.0, 3.6$ Hz)<br>ddd ( $J = 15.5, 10.6, 7.5$ Hz) | 1H<br>1H  | 1, 3, 4, 10<br>1, 3, 10                 | H-1 $\alpha$ , H-2 $\beta$<br>H-1 $\alpha$ , H-1 $\beta$ , H-2 $\alpha$ ,                        | H-1 $\alpha$ , H-1 $\beta$ , H-2 $\beta$<br>H-1 $\beta$ , H-2 $\alpha$ , H <sub>3</sub> -18 $\beta$                |
| 3        | 216.5 s         |                               |                                                                   |           |                                         |                                                                                                  |                                                                                                                    |
| 4        | 47.8 s          |                               |                                                                   |           |                                         |                                                                                                  |                                                                                                                    |
| 5        | 56.3 d          | 1.31 $\alpha$                 | dd ( $J = 12.4, 2.4$ Hz),                                         | 1H        | 1, 4, 6, 7, 9, 10, 18, 19, 20           | H <sub>2</sub> -6                                                                                | H-6 $\alpha$ , H-6 $\beta$ , H-9 $\alpha$ , H <sub>3</sub> -19 $\alpha$                                            |
| 6        | 20.1 t          | 1.61 $\alpha$<br>1.42 $\beta$ | dd ( $J = 12.4, 5.0$ Hz)<br>overlap                               | 1H<br>1H  |                                         |                                                                                                  | H-5 $\alpha$ , H-6 $\beta$ , H-7 $\alpha$<br>H-5 $\alpha$ , H-7 $\beta$                                            |
| 7        | 42.9 t          | 1.71 $\beta$<br>0.96 $\alpha$ | dt ( $J = 12.6, 3.3$ Hz)<br>td ( $J = 12.6, 3.7$ Hz)              | 1H<br>1H  | 5, 8<br>5, 8, 9, 14<br>5, 6, 8, 14, 15  | H-5 $\alpha$ , H-7 $\alpha$<br>H <sub>2</sub> -6, H-7 $\alpha$<br>H <sub>2</sub> -6, H-7 $\beta$ | H-6 $\alpha$ , H-6 $\beta$ , H-7 $\alpha$ , H <sub>3</sub> -15 $\beta$<br>H-6 $\alpha$ , H-6 $\beta$ , H-7 $\beta$ |
| 8        | 38.3 s          |                               |                                                                   |           |                                         |                                                                                                  |                                                                                                                    |
| 9        | 59.4 d          | 1.02 $\alpha$                 | s                                                                 | 1H        | 1, 5, 7, 8, 10, 11, 12, 14, 15, 20      | H <sub>2</sub> -11                                                                               | H-1 $\alpha$ , H-7 $\alpha$ , H <sub>2</sub> -11, H-14 $\alpha$                                                    |
| 10       | 38.4 s          |                               |                                                                   |           |                                         |                                                                                                  |                                                                                                                    |
| 11       | 71.8 d          | 4.73 $\alpha$                 | d ( $J = 1.2$ Hz)                                                 | 1H        | 8, 9, 12, 13                            | H-9 $\alpha$ , H-12 $\alpha$                                                                     | H-1 $\alpha$ , H-9 $\alpha$ , H-12 $\alpha$                                                                        |
| 12       | 78.4 d          | 4.06 $\alpha$                 | d ( $J = 3.4$ Hz)                                                 | 1H        | 13, 14, 16                              | H-11 $\alpha$                                                                                    | H-9 $\alpha$ , H-11 $\alpha$ , H-14 $\alpha$ ,                                                                     |
| 13       | 89.1 s          |                               |                                                                   |           |                                         |                                                                                                  |                                                                                                                    |
| 14       | 51.9 d          | 1.64 $\alpha$                 | dd ( $J = 12.7, 4.8$ Hz)                                          | 1H        | 7, 8, 9, 12, 13, 16, 2'                 | H-17 $\alpha$ , H-17 $\beta$                                                                     | H-9 $\alpha$ , H-12 $\alpha$ , H-17 $\alpha$ , H-17 $\beta$                                                        |
| 15       | 17.5 q          | 1.44 $\beta$                  | s                                                                 | 3H        | 7, 8, 9, 14                             |                                                                                                  | H-7 $\beta$ , H <sub>3</sub> -16 $\beta$ , H-17 $\beta$ , H <sub>3</sub> -20 $\beta$                               |
| 16       | 16.4 q          | 1.80 $\beta$                  | s                                                                 | 3H        | 12, 13, 14                              |                                                                                                  | H <sub>3</sub> -15 $\beta$ , H-17 $\beta$                                                                          |
| 17       | 16.3 t          | 2.90 $\alpha$<br>2.58 $\beta$ | dd ( $J = 16.2, 4.8$ Hz)<br>dd ( $J = 16.2, 12.7$ Hz)             | 1H<br>1H  | 13, 14, 1', 2', 3'<br>8, 13, 14, 1', 2' | H-14 $\alpha$ , H-17 $\beta$<br>H-14 $\alpha$ , H-17 $\beta$                                     | H-14 $\alpha$ , H-17 $\alpha$<br>H <sub>3</sub> -15 $\beta$ , H <sub>3</sub> -16 $\beta$ , H-17 $\alpha$           |
| 18       | 21.7 q          | 1.09 $\beta$                  | s                                                                 | 3H        | 3, 4, 5, 19                             |                                                                                                  | H-2 $\beta$ , H <sub>2</sub> -6, H <sub>3</sub> -19 $\alpha$                                                       |
| 19       | 27.0 q          | 1.15 $\alpha$                 | s                                                                 | 3H        | 3, 4, 5, 18                             |                                                                                                  | H-2 $\alpha$ , H-5 $\alpha$ , H <sub>3</sub> -18 $\beta$                                                           |
| 20       | 18.0 t          | 1.59 $\beta$                  | s                                                                 | 3H        | 1, 5, 9, 10                             |                                                                                                  | H-1 $\beta$ , H <sub>3</sub> -15 $\beta$ , H <sub>3</sub> -18 $\beta$                                              |
| 1'       | 163.2 s         |                               |                                                                   |           |                                         |                                                                                                  |                                                                                                                    |
| 2'       | 99.1 s          |                               |                                                                   |           |                                         |                                                                                                  |                                                                                                                    |
| 3'       | 180.2 s         |                               |                                                                   |           |                                         |                                                                                                  |                                                                                                                    |
| 4'       | 112.8 d         | 6.22                          | s                                                                 | 1H        | 2', 3', 5', 6'                          |                                                                                                  | H <sub>3</sub> -6'                                                                                                 |
| 5'       | 161.1 s         |                               |                                                                   |           |                                         |                                                                                                  |                                                                                                                    |
| 6'       | 19.3 q          | 2.04                          | s                                                                 | 3H        | 4', 5'                                  |                                                                                                  |                                                                                                                    |
| 11-OH    |                 | 6.08                          |                                                                   | 1H        |                                         |                                                                                                  |                                                                                                                    |
| 12-OH    |                 | 5.02                          |                                                                   | 1H        |                                         |                                                                                                  |                                                                                                                    |

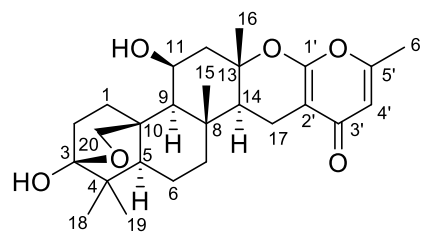

**13**

Table S9. NMR data for chevalone Q (**13**) ( $^1\text{H}$  NMR: 500 MHz,  $^{13}\text{C}$  NMR: 125 MHz,  $\delta$  in ppm, recorded in pyridine- $d_5$ ).

| position | $^{13}\text{C}$ |                               | $^1\text{H}$                                       |           |                                         |                                                                        |                                                                           |
|----------|-----------------|-------------------------------|----------------------------------------------------|-----------|-----------------------------------------|------------------------------------------------------------------------|---------------------------------------------------------------------------|
|          | $\delta$ (ppm)  | $\delta$ (ppm)                | Multiplicity                                       | intensity | HMBC correlation                        | COSY correlation                                                       | NOESY correlation                                                         |
| 1        | 35.6 t          | 1.22 $\alpha$<br>2.48 $\beta$ | d ( $J = 7.4$ Hz)<br>dd ( $J = 7.4, 5.2$ Hz)       | 1H<br>1H  | 3, 5, 9, 20<br>2, 5, 10                 | H-1 $\beta$ , H-2 $\alpha$<br>H-1 $\alpha$ , H-2 $\beta$               | H-2 $\alpha$ , H-5 $\alpha$<br>H <sub>2</sub> -20 $\beta$                 |
| 2        | 31.1 t          | 2.13 $\alpha$<br>2.41 $\beta$ | m<br>m                                             | 1H<br>1H  | 4, 10<br>1                              | H-1 $\alpha$ , H-1 $\beta$ , H-2 $\alpha$<br>H-1 $\beta$ , H-2 $\beta$ | H-2 $\beta$<br>H-1 $\beta$ , H-2 $\alpha$                                 |
| 3        | 98.0 s          |                               |                                                    |           |                                         |                                                                        |                                                                           |
| 4        | 41.3 s          |                               |                                                    |           |                                         |                                                                        |                                                                           |
| 5        | 51.2 d          | 1.29 $\alpha$                 | d ( $J = 4.1$ Hz)                                  | 1H        | 1, 3, 4, 7, 9, 10, 18, 19, 20           | H-6 $\beta$                                                            | H-1 $\alpha$ , H-6 $\alpha$ , H-9 $\alpha$ , H <sub>3</sub> -19 $\alpha$  |
| 6        | 20.6 t          | 1.56 $\beta$<br>1.90 $\alpha$ | m<br>overlap                                       | 1H<br>1H  | 5, 8, 10<br>4, 5, 8, 10                 | H-5 $\alpha$<br>H-7 $\alpha$                                           | H-5 $\alpha$<br>H-7 $\beta$                                               |
| 7        | 41.5 t          | 1.02 $\beta$<br>1.74 $\alpha$ | t ( $J = 12.8$ Hz)<br>d ( $J = 6.7$ Hz)            | 1H<br>1H  | 8, 14, 15<br>5, 6, 8, 9, 14, 15         | H-7 $\alpha$ , H-12 $\beta$<br>H-6 $\beta$ , H-7 $\beta$               | H-7 $\alpha$ , H <sub>3</sub> -15 $\beta$<br>H-14 $\alpha$ , H-9 $\alpha$ |
| 8        | 37.4 s          |                               |                                                    |           |                                         |                                                                        |                                                                           |
| 9        | 57.0 d          | 1.17 $\alpha$                 | s                                                  | 1H        | 1, 5, 8, 10, 11, 12, 14, 15, 20         | H-11 $\alpha$                                                          | H-12 $\alpha$ , H-14 $\alpha$                                             |
| 10       | 37.4 s          |                               |                                                    |           |                                         |                                                                        |                                                                           |
| 11       | 66.1 d          | 4.8 $\alpha$                  | br s                                               | 1H        | 13                                      | H-9 $\alpha$ , H-12 $\alpha$ , H-12 $\beta$                            | H-9 $\alpha$ , H-12 $\alpha$ , H-12 $\beta$                               |
| 12       | 48.5 t          | 2.02 $\beta$<br>2.45 $\alpha$ | s<br>m                                             | 1H<br>1H  | 13, 14, 16<br>9, 11, 13, 14, 16         | H-7 $\beta$ , H-11 $\alpha$<br>H-11 $\alpha$                           | H <sub>3</sub> -16 $\beta$<br>H-14 $\alpha$                               |
| 13       | 84.8 s          |                               |                                                    |           |                                         |                                                                        |                                                                           |
| 14       | 52.8 d          | 1.64 $\alpha$                 | dd ( $J = 12.6, 4.8$ Hz)                           | 1H        | 7, 8, 9, 12, 13, 15, 16                 | H-17 $\alpha$                                                          | H-7 $\alpha$ , H-9 $\alpha$ , H-12 $\alpha$ , H-17 $\alpha$               |
| 15       | 16.7 q          | 1.32 $\beta$                  | s                                                  | 3H        | 7, 8, 9, 14                             |                                                                        | H <sub>3</sub> -16 $\beta$ , H-20b                                        |
| 16       | 22.6 q          | 1.68 $\beta$                  | s                                                  | 3H        | 12, 13, 14                              |                                                                        | H <sub>3</sub> -15 $\beta$                                                |
| 17       | 16.7 t          | 2.52 $\beta$<br>2.91 $\alpha$ | overlap<br>dd ( $J = 16.4, 4.8$ Hz)                | 1H<br>1H  | 8, 13, 14, 1', 2'<br>13, 14, 1', 2', 3' |                                                                        | H <sub>3</sub> -15 $\beta$ , H <sub>3</sub> -16 $\beta$<br>H-14 $\alpha$  |
| 18       | 19.9 q          | 1.37 $\beta$                  | s                                                  | 3H        | 3, 4, 5, 19                             | H-14 $\alpha$ , H-17 $\beta$                                           | H-14 $\alpha$                                                             |
| 19       | 28.1 q          | 1.27 $\alpha$                 | s                                                  | 3H        | 3, 4, 5, 18                             |                                                                        | H-20 $\alpha$                                                             |
| 20       | 69.4 t          | 4.67 $\alpha$<br>5.01 $\beta$ | dd ( $J = 9.4, 2.9$ Hz)<br>dd ( $J = 9.4, 1.8$ Hz) | 1H<br>1H  | 1, 5, 10<br>1, 3, 5, 10                 | H-20 $\alpha$<br>H-20 $\beta$                                          | H <sub>3</sub> -17 $\beta$<br>H-20 $\alpha$                               |
| 1'       | 163.0 s         |                               |                                                    |           |                                         |                                                                        |                                                                           |
| 2'       | 99.4 s          |                               |                                                    |           |                                         |                                                                        |                                                                           |
| 3'       | 180.3 s         |                               |                                                    |           |                                         |                                                                        |                                                                           |
| 4'       | 112.7 d         | 6.22                          | s                                                  | 1H        | 2', 5', 6'                              |                                                                        | H <sub>3</sub> -6'                                                        |
| 5'       | 161.1 s         |                               |                                                    |           |                                         |                                                                        |                                                                           |
| 6'       | 19.3 q          | 2.05                          | s                                                  | 3H        | 4', 5'                                  |                                                                        | H-4'                                                                      |

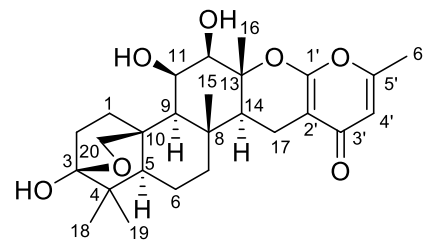

**14**

Table S10. NMR data for chevalone R (**14**) ( $^1\text{H}$  NMR: 600 MHz,  $^{13}\text{C}$  NMR: 150 MHz,  $\delta$  in ppm, recorded in pyridine- $d_5$ ).

| position | $^{13}\text{C}$ |                               | $^1\text{H}$                                          |           |                                         |                                                               |                                                                                                                        |
|----------|-----------------|-------------------------------|-------------------------------------------------------|-----------|-----------------------------------------|---------------------------------------------------------------|------------------------------------------------------------------------------------------------------------------------|
|          | $\delta$ (ppm)  | $\delta$ (ppm)                | Multiplicity                                          | intensity | HMBC correlation                        | COSY correlation                                              | NOESY correlation                                                                                                      |
| 1        | 35.5 t          | 2.45 $\beta$<br>1.17 $\alpha$ | m<br>m                                                | 1H<br>1H  | 2, 3, 5, 10, 20<br>3, 10, 20            | H-1 $\alpha$<br>H-1 $\beta$ , H-2 $\alpha$                    | H-1 $\alpha$ , H <sub>2</sub> -20<br>H-1 $\beta$ , H-2 $\alpha$                                                        |
| 2        | 31.1 t          | 2.38 $\beta$<br>2.09 $\alpha$ | td ( $J = 12.1, 5.4$ Hz)<br>m                         | 1H<br>1H  | 3, 10<br>1, 3, 10                       | H-1 $\beta$<br>H-1 $\beta$                                    | H-1 $\alpha$<br>H-1 $\alpha$ , H-1 $\beta$                                                                             |
| 3        | 98.1 s          |                               |                                                       |           |                                         |                                                               |                                                                                                                        |
| 4        | 41.5 s          |                               |                                                       |           |                                         |                                                               |                                                                                                                        |
| 5        | 51.1 d          | 1.31 $\alpha$                 | dd ( $J = 13.0, 4.4$ Hz)                              | 1H        | 3, 4, 7, 10, 18, 19, 20                 | H <sub>2</sub> -6                                             | H-1 $\alpha$ , H-7 $\alpha$ , H-9 $\alpha$                                                                             |
| 6        | 20.7 t          | 1.90 $\alpha$<br>1.57 $\beta$ | dd ( $J = 13.0, 3.3$ Hz)<br>dd ( $J = 14.3, 4.4$ Hz)  | 2H        | 4, 5, 7, 8                              | H-5 $\alpha$ , H-7 $\alpha$                                   | H-5 $\alpha$ , H-6 $\beta$<br>H-5 $\alpha$ , H-6 $\alpha$ , H-7 $\alpha$ , H <sub>3</sub> -15 $\beta$                  |
| 7        | 41.2 t          | 1.76 $\alpha$<br>1.01 $\beta$ | d ( $J = 12.8$ Hz)<br>td ( $J = 12.0, 4.5$ Hz)        | 1H<br>1H  | 5, 8, 9, 14, 15<br>5, 8, 9, 14, 15      | H <sub>2</sub> -6, H-7 $\beta$<br>H-7 $\alpha$                | H-5 $\alpha$ , H-6 $\alpha$ , H-7 $\beta$ , H-14 $\alpha$<br>H-7 $\alpha$ , H <sub>3</sub> -15 $\beta$ , H-17 $\beta$  |
| 8        | 37.5 s          |                               |                                                       |           |                                         |                                                               |                                                                                                                        |
| 9        | 55.8 d          | 1.24 $\alpha$                 | s                                                     | 1H        | 1, 5, 7, 8, 10, 11, 12, 14, 15, 20      | H-11 $\alpha$                                                 | H-5 $\alpha$ , H-11 $\alpha$ , H-12 $\alpha$ , H-14 $\alpha$                                                           |
| 10       | 37.3 s          |                               |                                                       |           |                                         |                                                               |                                                                                                                        |
| 11       | 71.1 d          | 4.80 $\alpha$                 | s                                                     | 1H        | 8, 9, 12, 13                            | H-9 $\alpha$ , H-12 $\alpha$                                  | H-1 $\alpha$ , H-12 $\alpha$                                                                                           |
| 12       | 78.2 d          | 4.07 $\alpha$                 | t ( $J = 4.5$ Hz)                                     | 1H        | 13, 16                                  | H-11 $\alpha$                                                 | H-9 $\alpha$ , H-11 $\alpha$ , H-14 $\alpha$                                                                           |
| 13       | 89.0 s          |                               |                                                       |           |                                         |                                                               |                                                                                                                        |
| 14       | 51.5 d          | 1.63 $\alpha$                 | dd ( $J = 12.5, 4.8$ Hz)                              | 1H        | 8, 9, 12, 13, 15, 16, 17, 2'            | H-17 $\alpha$ , H-17 $\beta$                                  | H-7 $\alpha$ , H-9 $\alpha$ , H-12 $\alpha$ , H-17 $\alpha$                                                            |
| 15       | 16.7 q          | 1.35 $\beta$                  | s                                                     | 3H        | 7, 8, 9, 14                             |                                                               | H <sub>3</sub> -16 $\beta$ , H-17 $\beta$ , H <sub>2</sub> -20                                                         |
| 16       | 16.6 q          | 1.79 $\beta$                  | s                                                     | 3H        | 12, 13, 14                              |                                                               | H <sub>3</sub> -15 $\beta$ , H-17 $\beta$ , H <sub>2</sub> -20                                                         |
| 17       | 16.5 t          | 2.95 $\alpha$<br>2.55 $\beta$ | dd ( $J = 16.2, 4.8$ Hz)<br>dd ( $J = 16.2, 12.5$ Hz) | 1H<br>1H  | 8, 13, 14, 1', 2'<br>13, 14, 1', 2', 3' | H-14 $\alpha$ , H-17 $\beta$<br>H-14 $\alpha$ , H-17 $\alpha$ | H-7 $\alpha$ , H-14 $\alpha$ , H-17 $\beta$<br>H <sub>3</sub> -15 $\beta$ , H <sub>3</sub> -16 $\beta$ , H-17 $\alpha$ |
| 18       | 20.0 q          | 1.38 $\beta$                  | s                                                     | 3H        | 3, 4, 5, 19                             |                                                               | H-6 $\beta$                                                                                                            |
| 19       | 28.1 q          | 1.26 $\alpha$                 | s                                                     | 3H        | 3, 4, 5, 18                             |                                                               | H-5 $\alpha$                                                                                                           |
| 20       | 69.7 t          | 5.05 $\alpha$<br>4.73 $\beta$ | d ( $J = 9.4$ Hz)<br>dd ( $J = 9.4, 2.8$ Hz)          | 1H<br>1H  | 1, 5, 9, 10<br>1, 5, 9, 10              | H-20 $\beta$<br>H-20 $\alpha$                                 | H-20 $\beta$<br>H <sub>3</sub> -18 $\beta$ , H-20 $\alpha$                                                             |
| 1'       | 163.2 s         |                               |                                                       |           |                                         |                                                               |                                                                                                                        |
| 2'       | 99.1 s          |                               |                                                       |           |                                         |                                                               |                                                                                                                        |
| 3'       | 180.2 s         |                               |                                                       |           |                                         |                                                               |                                                                                                                        |
| 4'       | 112.8 d         | 6.21                          | s                                                     | 1H        | 2', 3', 5', 6'                          |                                                               | H <sub>3</sub> -6'                                                                                                     |
| 5'       | 161.0 s         |                               |                                                       |           |                                         |                                                               |                                                                                                                        |
| 6'       | 19.3 q          | 2.04                          | s                                                     | 3H        | 4', 5'                                  |                                                               | H-4'                                                                                                                   |

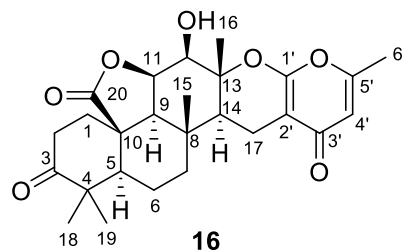

Table S11. NMR data for chevalone T (**16**) ( $^1\text{H}$  NMR: 600 MHz,  $^{13}\text{C}$  NMR: 150 MHz,  $\delta$  in ppm, recorded in pyridine- $d_5$ ).

| position | $^{13}\text{C}$ |                | $^1\text{H}$                    |           |                              |                                            |                                                                         |
|----------|-----------------|----------------|---------------------------------|-----------|------------------------------|--------------------------------------------|-------------------------------------------------------------------------|
|          | $\delta$ (ppm)  | $\delta$ (ppm) | Multiplicity                    | intensity | HMBC correlation             | COSY correlation                           | NOESY correlation                                                       |
| 1        | 33.2 t          | 2.37 $\beta$   | ddd ( $J = 13.5, 7.6, 3.2$ Hz)  | 1H        | 2, 3, 5, 10, 20              | H-1 $\alpha$                               | H-1 $\beta$ , H-2 $\beta$                                               |
|          |                 | 1.85 $\alpha$  | overlap                         | 1H        | 2, 3, 9, 10, 20              | H-1 $\beta$ , H-2 $\alpha$                 | H-1 $\alpha$ , H-2 $\alpha$ , H-9 $\alpha$                              |
|          |                 | 2.77 $\beta$   | ddd ( $J = 16.8, 10.7, 7.3$ Hz) | 1H        | 1, 3, 4                      | H-1 $\alpha$                               | H-1 $\beta$                                                             |
| 2        | 34.3 t          | 2.62 $\alpha$  | ddd ( $J = 16.8, 7.3, 3.2$ Hz)  | 1H        | 1, 3, 4, 10                  | H-1 $\alpha$                               | H-1 $\alpha$ , H-1 $\beta$                                              |
|          |                 | 2.09 $\alpha$  | dd ( $J = 12.8, 6.2$ Hz)        | 1H        | 1, 4, 6, 7, 10, 18, 19, 20   | H <sub>2</sub> -6                          | H-6 $\alpha$ , H-9 $\alpha$ , H <sub>3</sub> -19 $\alpha$               |
|          |                 | 1.76 $\alpha$  | overlap                         | 1H        | 4, 5, 7, 8                   | H-5 $\alpha$ , H-6 $\beta$ , H-7 $\alpha$  | H-5 $\alpha$ , H-6 $\beta$                                              |
| 3        | 213.5 s         | 1.56 $\beta$   | overlap                         | 1H        | 4, 5, 7, 8                   | H-5 $\alpha$ , H-6 $\alpha$ , H-7 $\alpha$ | H-5 $\alpha$ , H-6 $\alpha$ , H-7 $\beta$                               |
|          |                 | 1.58 $\alpha$  | overlap                         | 1H        | 5, 8, 9, 14                  | H <sub>2</sub> -6, H-7 $\beta$             | H-5 $\alpha$ , H-6 $\alpha$                                             |
|          |                 | 1.17 $\beta$   | overlap                         | 1H        | 5, 8, 9, 14, 15              | H-7 $\alpha$                               | H-7 $\alpha$                                                            |
| 4        | 48.1 s          |                |                                 |           |                              |                                            |                                                                         |
| 5        | 49.2 d          |                |                                 |           |                              |                                            |                                                                         |
| 6        | 20.3 t          | 1.90 $\alpha$  | overlap                         | 1H        | 1, 5, 7, 8, 10, 15, 20       | H-11 $\alpha$                              | H-5 $\alpha$ , H-11 $\alpha$ , H-12 $\alpha$ , H-19 $\alpha$            |
|          |                 | 5.31 $\alpha$  | dd ( $J = 5.3, 2.9$ Hz)         | 1H        | 8, 9, 10, 12, 13             | H-9 $\alpha$ , H-12 $\alpha$               | H-9 $\alpha$ , H-12 $\alpha$                                            |
|          |                 | 4.50 $\alpha$  | t ( $J = 5.3$ Hz)               | 1H        | 13, 16                       | H-11 $\alpha$                              | H-11 $\alpha$ , H-14 $\alpha$                                           |
| 7        | 35.1 t          |                |                                 |           |                              |                                            |                                                                         |
| 8        | 35.0 s          | 1.77 $\alpha$  | overlap                         | 1H        | 8, 9, 12, 13, 15, 16, 17, 2' | H-17 $\alpha$ , H-17 $\beta$               | H-9 $\alpha$ , H-12 $\alpha$ , H-17 $\alpha$                            |
|          |                 | 1.14 $\beta$   | s                               | 3H        | 7, 8, 9, 14                  |                                            | H <sub>3</sub> -16 $\beta$ , H-17 $\beta$                               |
|          |                 | 1.72 $\beta$   | s                               | 3H        | 12, 13, 14                   |                                            | H <sub>3</sub> -15 $\beta$ , H-17 $\beta$                               |
| 9        | 56.4 d          | 2.83 $\alpha$  | dd ( $J = 16.2, 4.9$ Hz)        | 1H        | 8, 13, 14, 1', 2'            | H-14 $\alpha$ , H-17 $\beta$               | H-7 $\alpha$ , H-14 $\alpha$ , H-17 $\beta$                             |
|          |                 | 2.53 $\beta$   | dd ( $J = 16.2, 12.8$ Hz)       | 1H        | 13, 14, 1', 2', 3'           | H-14 $\alpha$ , H-17 $\alpha$              | H <sub>3</sub> -15 $\beta$ , H <sub>3</sub> -16 $\beta$ , H-17 $\alpha$ |
|          |                 | 1.61 $\beta$   | s                               | 3H        | 3, 4, 5, 19                  |                                            | H-6 $\beta$ , H-7 $\beta$                                               |
| 10       | 47.7 s          |                |                                 |           |                              |                                            |                                                                         |
| 11       | 78.8d           |                |                                 |           |                              |                                            |                                                                         |
| 12       | 76.1 d          |                |                                 |           |                              |                                            |                                                                         |
| 13       | 88.7 s          |                |                                 |           |                              |                                            |                                                                         |
| 14       | 47.3 d          |                |                                 |           |                              |                                            |                                                                         |
| 15       | 16.6 q          |                |                                 |           |                              |                                            |                                                                         |
| 16       | 19.9q           |                |                                 |           |                              |                                            |                                                                         |
| 17       | 16.4 t          | 1.20 $\alpha$  | s                               | 3H        | 3, 4, 5, 18                  |                                            | H-5 $\alpha$ , H-6 $\alpha$                                             |
|          |                 | 21.4q          |                                 |           |                              |                                            |                                                                         |
|          |                 | 27.2 q         |                                 |           |                              |                                            |                                                                         |
| 18       | 21.4q           |                |                                 |           |                              |                                            |                                                                         |
| 19       | 27.2 q          |                |                                 |           |                              |                                            |                                                                         |
| 20       | 177.8 s         |                |                                 |           |                              |                                            |                                                                         |
| 1'       | 163.1 s         |                |                                 |           |                              |                                            |                                                                         |
| 2'       | 99.3 s          |                |                                 |           |                              |                                            |                                                                         |
| 3'       | 180.1 s         |                |                                 |           |                              |                                            |                                                                         |
| 4'       | 112.8 d         | 6.23           | s                               | 1H        | 2', 3', 5', 6'               |                                            | H <sub>3</sub> -6'                                                      |
| 5'       | 161.4 s         |                |                                 |           |                              |                                            |                                                                         |
| 6'       | 19.3 q          | 2.07           | s                               | 3H        | 4', 5'                       |                                            | H-4'                                                                    |

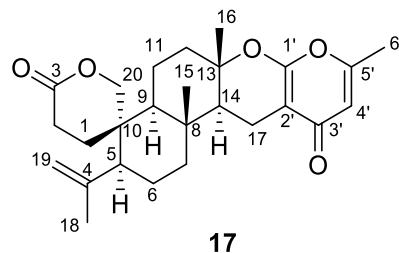

Table S12. NMR data for **17** ( $^1\text{H}$  NMR:600 MHz,  $^{13}\text{C}$  NMR: 150 MHz,  $\delta$  in ppm, recorded in  $\text{CDCl}_3$ ).

| position | $^{13}\text{C}$ |                | Multiplicity                    | intensity | HMBC correlation           | COSY correlation                                            | NOESY correlation                                                               |
|----------|-----------------|----------------|---------------------------------|-----------|----------------------------|-------------------------------------------------------------|---------------------------------------------------------------------------------|
|          | $\delta$ (ppm)  | $\delta$ (ppm) |                                 |           |                            |                                                             |                                                                                 |
| 1        | 30.0 t          | 1.67 $\beta$   | m                               | 1H        | 2, 3, 5, 9, 10, 20         | H-1 $\alpha$ , H-2 $\alpha$                                 | H-1 $\alpha$ , H $_3$ -15 $\beta$                                               |
|          |                 | 2.32 $\alpha$  | ddd ( $J = 14.3, 11.6, 6.1$ Hz) | 1H        | 2, 3, 5, 9, 10, 20         | H-1 $\beta$ , H $_2$ -2                                     | H-6 $\alpha$                                                                    |
| 2        | 30.1 t          | 2.45           | m                               | 2H        | 1, 3, 10, 11               | H $_2$ -1                                                   | H-1 $\beta$                                                                     |
| 3        | 173.6 s         |                |                                 |           |                            |                                                             |                                                                                 |
| 4        | 145.7 s         |                |                                 |           |                            |                                                             |                                                                                 |
| 5        | 55.5 d          | 1.96 $\alpha$  | dd ( $J = 13.0, 2.8$ Hz)        | 1H        | 1, 4, 6, 9, 10, 18, 19, 20 | H-6 $\alpha$ , H-6 $\beta$                                  | H-3 $\alpha$ , H-6 $\alpha$ , H-7 $\alpha$ , H-9 $\alpha$ , H $_3$ -19 $\alpha$ |
| 6        | 23.6 t          | 1.88 $\beta$   | overlap                         | 1H        | 4, 5                       | H-5 $\alpha$ , H-6 $\alpha$ , H-7 $\alpha$ , H-7 $\beta$    | H-1 $\alpha$ , H-6 $\beta$ , H-7 $\beta$                                        |
|          |                 | 1.57 $\alpha$  | overlap                         | 1H        | 4, 5, 8, 9                 | H-5 $\alpha$ , H-6 $\beta$ , H-7 $\alpha$ , H-7 $\beta$     | H-5 $\alpha$ , H-6 $\alpha$                                                     |
| 7        | 39.2 t          | 1.14 $\alpha$  | td ( $J = 13.0, 3.5$ Hz)        | 1H        | 5, 6, 8, 9, 14, 15         | H-6 $\alpha$ , H-6 $\beta$ , H-7 $\beta$                    | H-6 $\alpha$ , H-7 $\beta$ , H $_3$ -15 $\beta$ , H-17 $\alpha$                 |
|          |                 | 1.92 $\beta$   | m                               | 1H        | 5, 6, 8, 9, 11, 15         | H-6 $\alpha$ , H-6 $\beta$ , H-7 $\alpha$                   | H-6 $\alpha$ , H-7 $\alpha$                                                     |
| 8        | 37.8 s          |                |                                 |           |                            |                                                             |                                                                                 |
| 9        | 59.2 d          | 1.29 $\alpha$  | dd ( $J = 12.3, 1.8$ Hz)        | 1H        | 10, 11, 12, 14, 15, 20     | H-11 $\beta$                                                | H-5 $\alpha$ , H-7 $\alpha$ , H-11 $\alpha$ , H-12 $\alpha$ , H-14 $\alpha$     |
| 10       | 40.6 s          |                |                                 |           |                            |                                                             |                                                                                 |
| 11       | 21.3 t          | 1.64 $\beta$   | overlap                         | 1H        | 9, 12, 13, 14              | H-9 $\alpha$ , H-11 $\alpha$ , H-12 $\alpha$ , H-12 $\beta$ | H-11 $\alpha$ , H $_3$ -15 $\beta$                                              |
|          |                 | 1.86 $\alpha$  | m                               | 1H        | 10, 13                     | H-11 $\beta$ , H-12 $\beta$                                 | H-1 $\alpha$ , H-9 $\alpha$ , H-11 $\beta$ , H-12 $\alpha$                      |
| 12       | 40.4 t          | 2.20 $\alpha$  | m                               | 1H        | 9, 11, 13, 14, 16          | H-11 $\beta$ , H-12 $\beta$                                 | H-9 $\alpha$ , H-11 $\alpha$ , H-14 $\alpha$                                    |
|          |                 | 1.74 $\beta$   | dd ( $J = 13.0, 3.7$ Hz)        | 1H        | 9, 11, 13, 14, 16          | H-11 $\alpha$ , H-11 $\beta$ , H-12 $\alpha$                | H-11 $\beta$ , H $_3$ -16 $\beta$                                               |
| 13       | 83.6 s          |                |                                 |           |                            |                                                             |                                                                                 |
| 14       | 52.1 d          | 1.54 $\alpha$  | overlap                         | 1H        | 8, 9, 13, 16, 17, 2'       | H-17 $\alpha$ , H-17 $\beta$                                | H-9 $\alpha$ , H-12 $\alpha$ , H-17 $\alpha$                                    |
| 15       | 15.3 q          | 0.91 $\beta$   | s                               | 3H        | 7, 8, 9, 14, 16, 20        |                                                             | H-1 $\alpha$ , H-1 $\beta$ , H-7 $\beta$ , H $_3$ -16 $\beta$ , H-17 $\beta$    |
| 16       | 20.6 q          | 1.32 $\beta$   | s                               | 3H        | 10, 13, 14                 |                                                             | H-11 $\beta$ , H-12 $\beta$ , H $_3$ -15 $\beta$ , H-17 $\beta$                 |
| 17       | 15.7 t          | 2.15 $\beta$   | dd ( $J = 16.3, 12.7$ Hz)       | 1H        | 8, 13, 14, 1', 2', 3'      | H-14 $\alpha$ , H-17 $\alpha$                               | H-7 $\beta$ , H $_3$ -15 $\beta$ , H $_3$ -16 $\beta$ , H-17 $\alpha$           |
|          |                 | 2.59 $\alpha$  | dd ( $J = 16.3, 4.9$ Hz)        | 1H        | 8, 13, 14, 1', 2', 3'      | H-14 $\alpha$ , H-17 $\beta$                                | H-14 $\alpha$ , H-17 $\beta$                                                    |
| 18       | 21.0 q          | 1.78           | s                               | 3H        | 4, 5, 6, 10, 19            |                                                             | H-2 $\beta$ , H-5 $\alpha$                                                      |
| 19       | 116.6 t         | 4.93 $\alpha$  | s                               | 1H        | 4, 5, 18                   |                                                             | H $_3$ -18 $\beta$                                                              |
|          |                 | 4.74 $\beta$   | s                               | 1H        | 4, 5, 18                   |                                                             |                                                                                 |
| 20       | 67.9 t          | 4.44 $\alpha$  | d ( $J = 12.4$ Hz)              | 1H        | 1, 3, 5, 9, 10             |                                                             | H $_3$ -15 $\beta$                                                              |
|          |                 | 4.15 $\beta$   | d ( $J = 12.4$ Hz)              | 1H        | 1, 3, 5, 9, 10             |                                                             | H-11 $\beta$ , H $_3$ -15 $\beta$                                               |
| 1'       | 162.6 s         |                |                                 |           |                            |                                                             |                                                                                 |
| 2'       | 98.5 s          |                |                                 |           |                            |                                                             |                                                                                 |
| 3'       | 180.7 s         |                |                                 |           |                            |                                                             |                                                                                 |
| 4'       | 112.2 d         | 6.00           | s                               | 1H        | 2', 3', 5', 6'             |                                                             | H $_3$ -6'                                                                      |
| 5'       | 160.9 s         |                |                                 |           |                            |                                                             |                                                                                 |
| 6'       | 19.5 q          | 2.21           | s                               | 3H        | 4', 5'                     |                                                             | H-4'                                                                            |

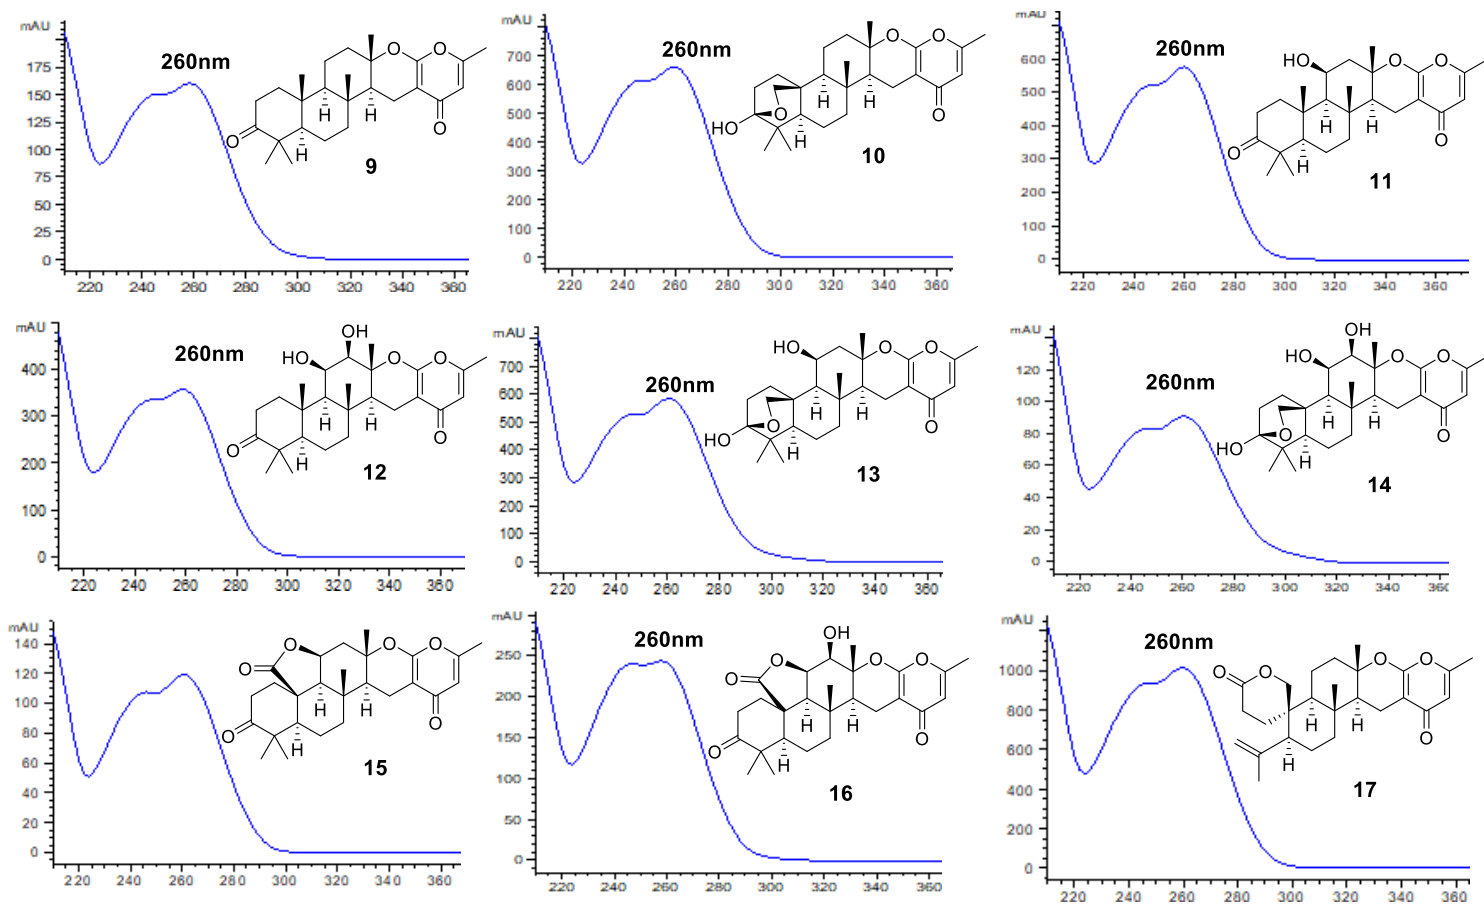

Figure S1. UV spectra of metabolites isolated in this study.



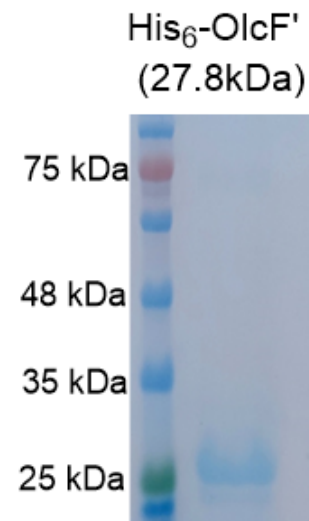

Figure S2. SDS-PAGE analysis of the purified protein OlcF'.

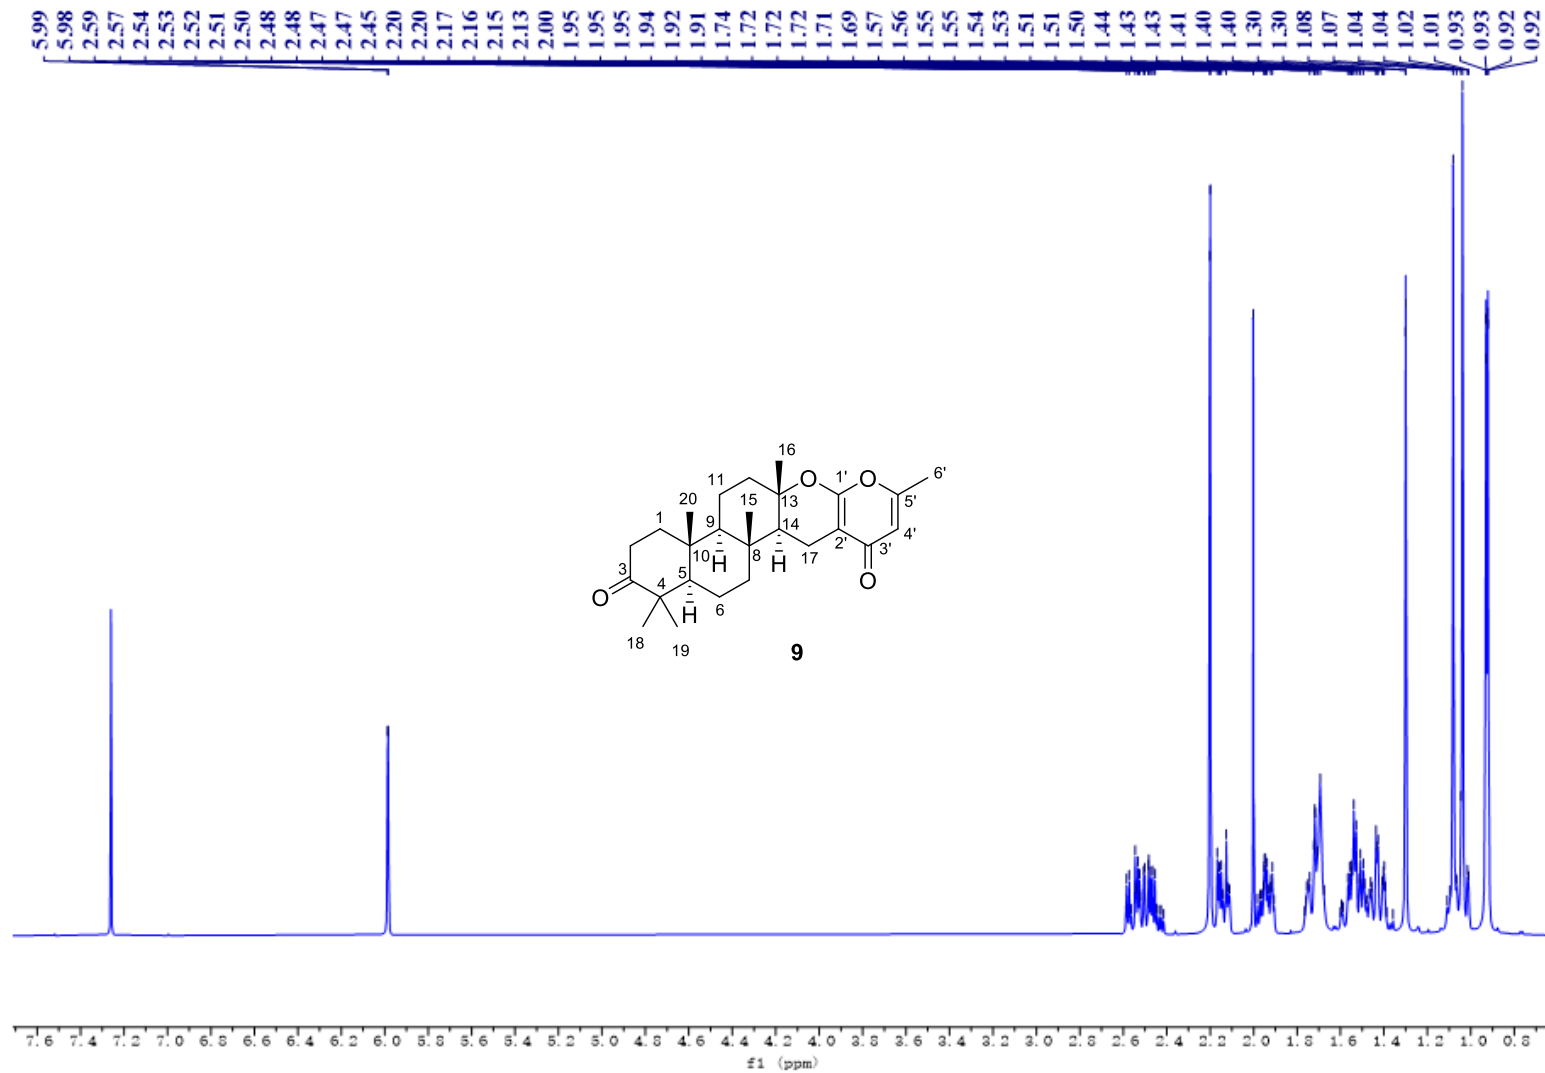

Figure S3. <sup>1</sup>H NMR spectrum of chevalone F (9).

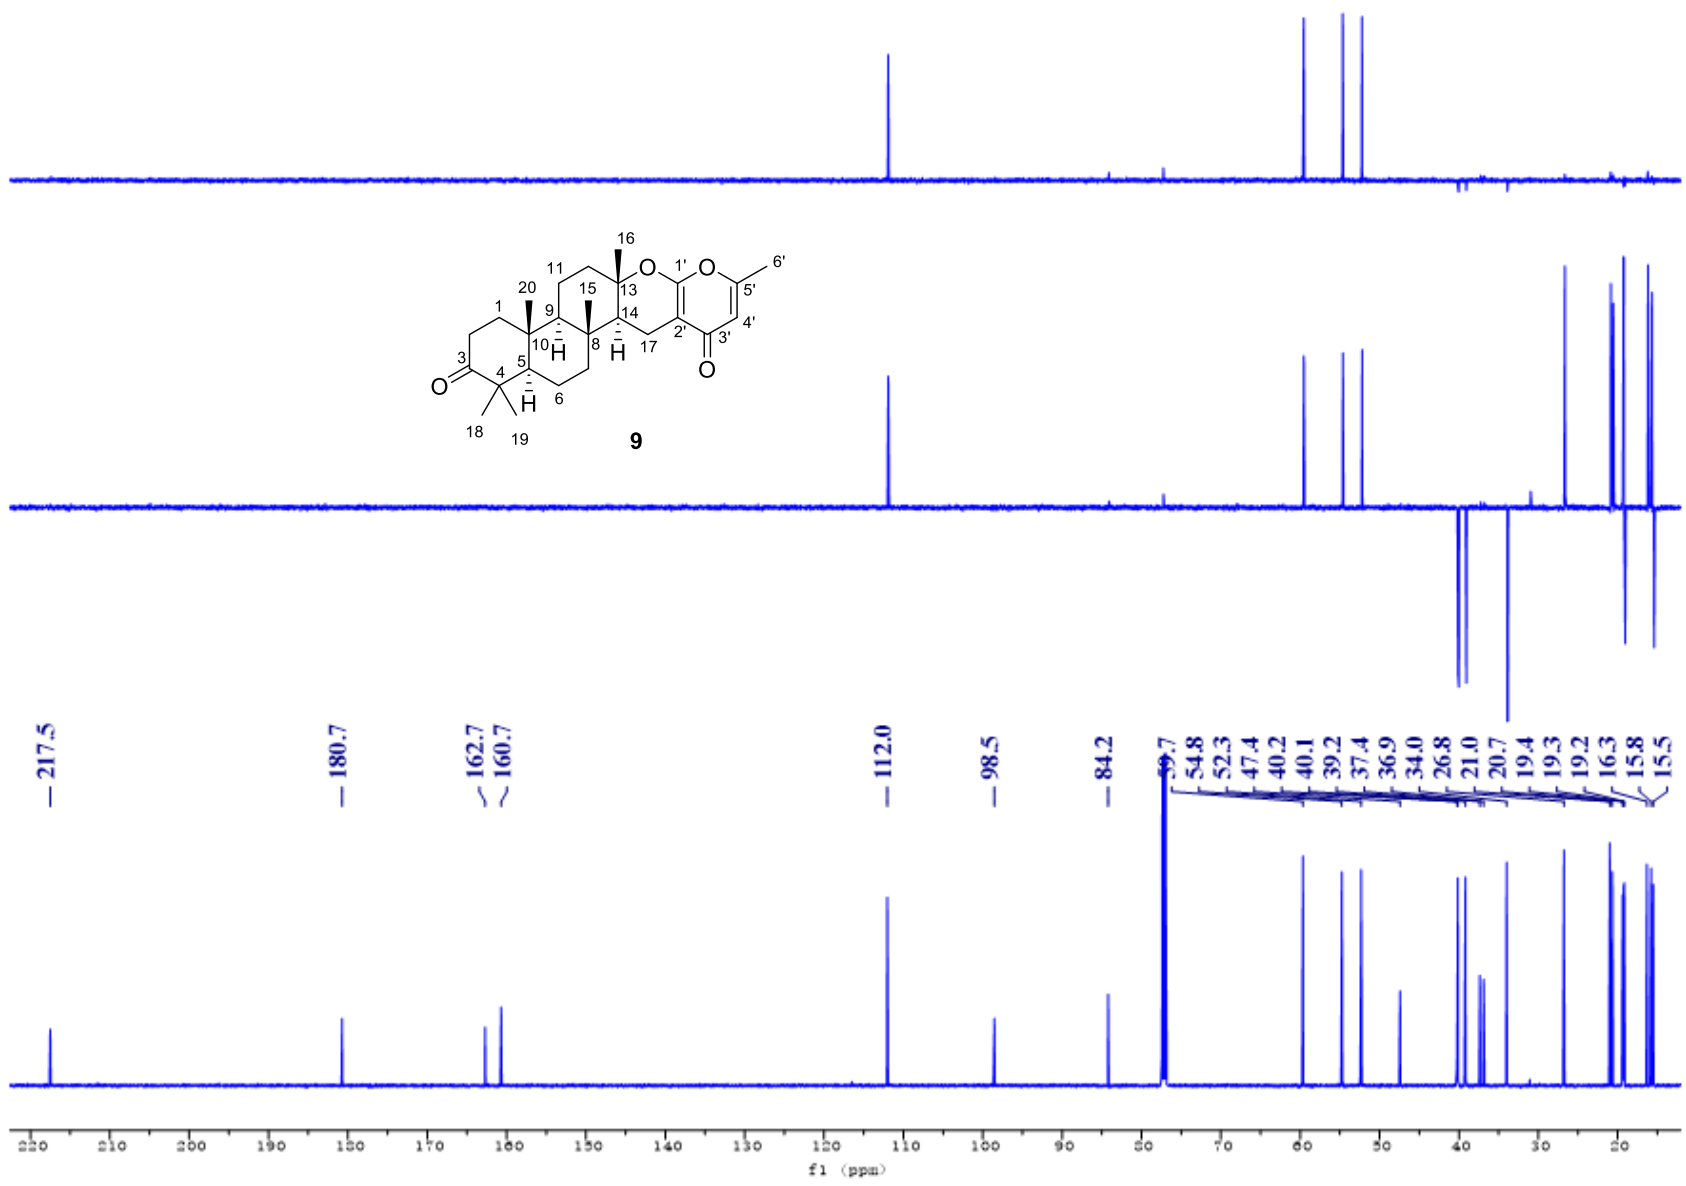

Figure S4. <sup>13</sup>C NMR spectrum of chevalone F (9).

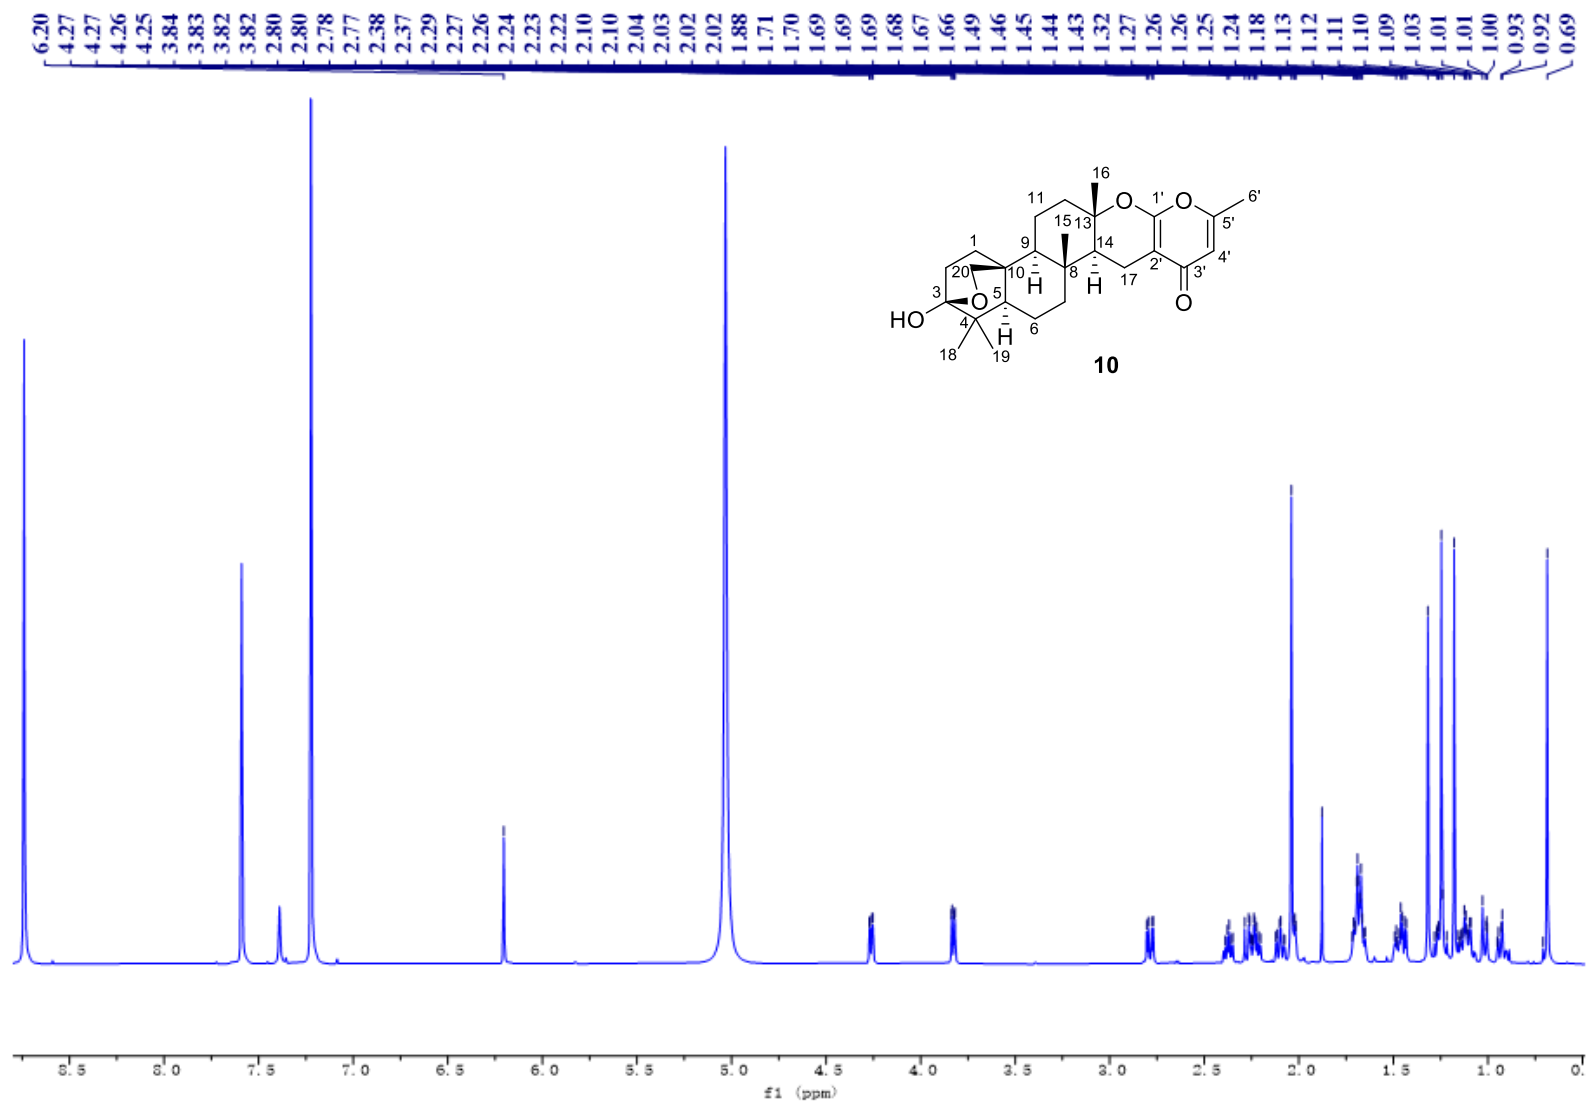

Figure S5. <sup>1</sup>H NMR spectrum of chevalone N (**10**).

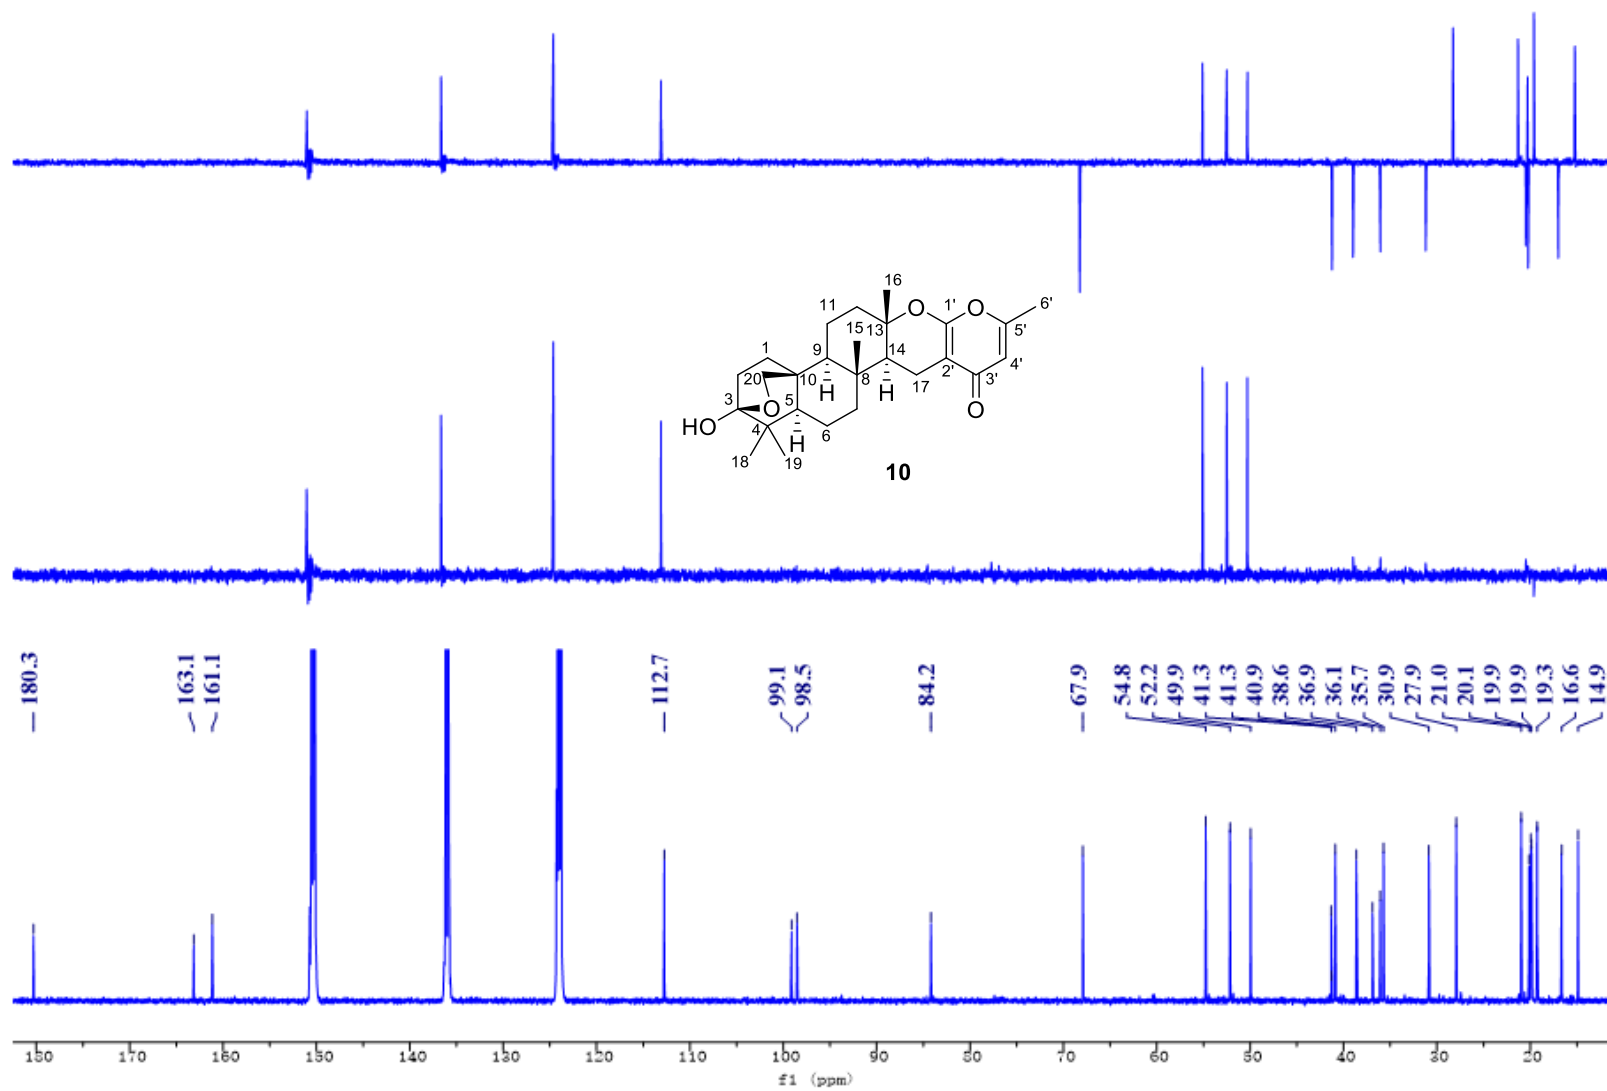

Figure S6. <sup>13</sup>C NMR spectrum of chevalone N (10).

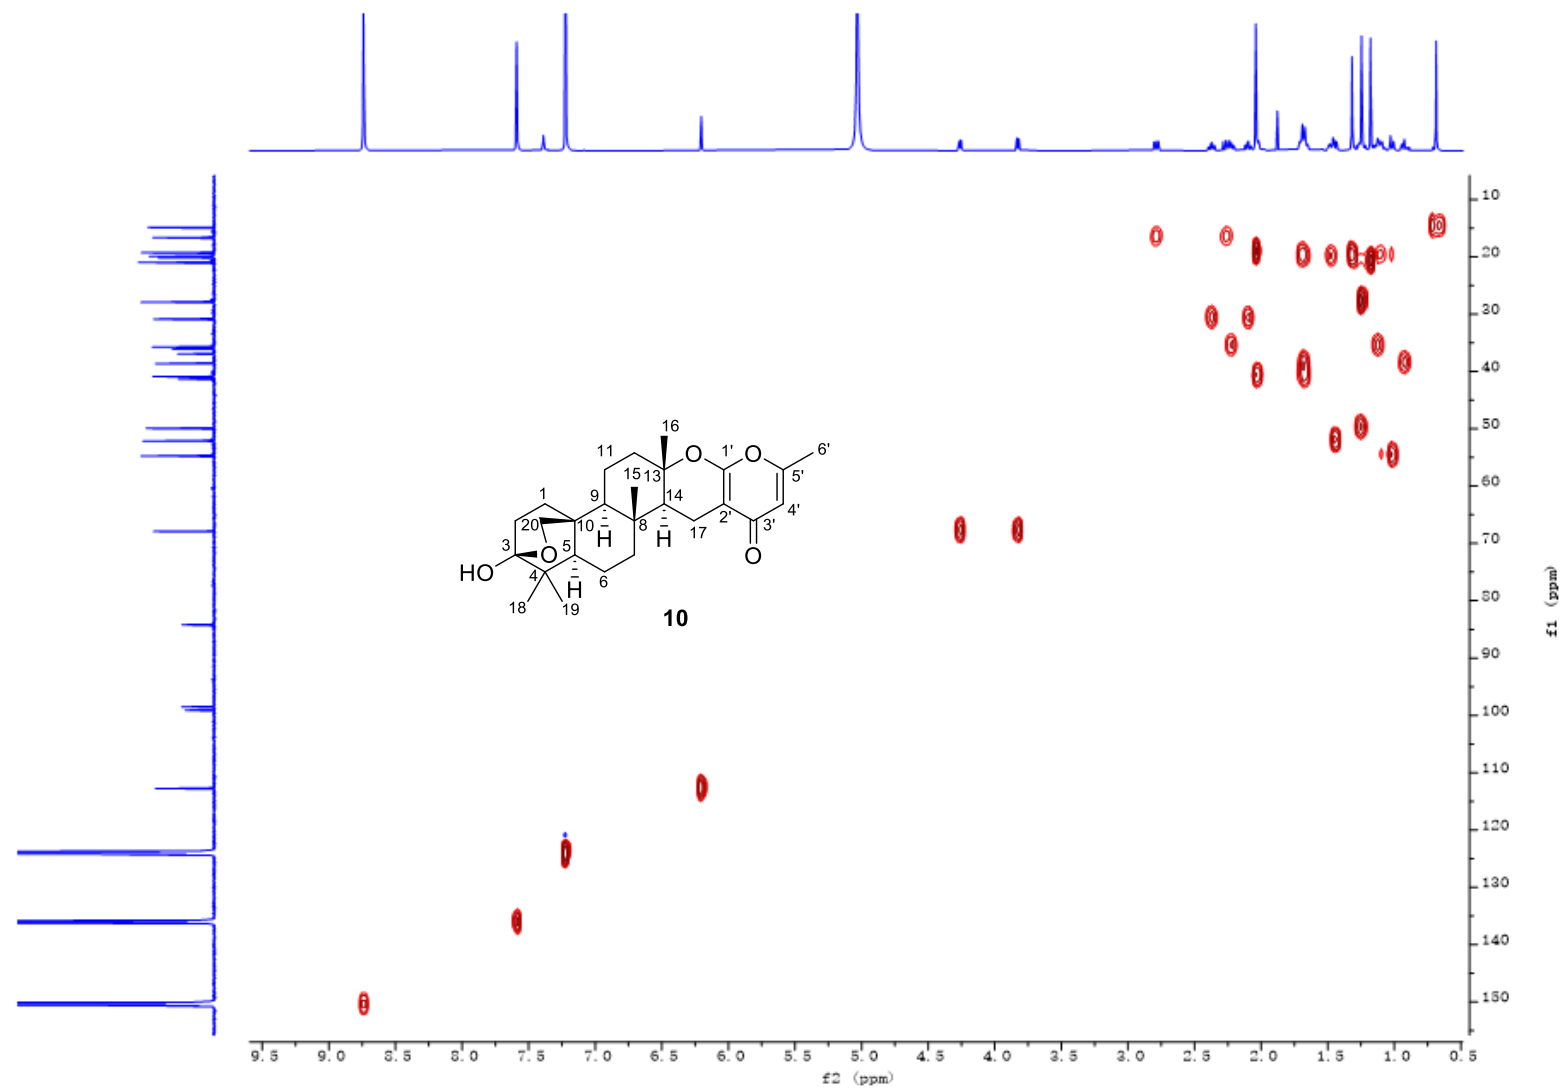

Figure S7. HSQC spectrum of chevalone N (**10**).

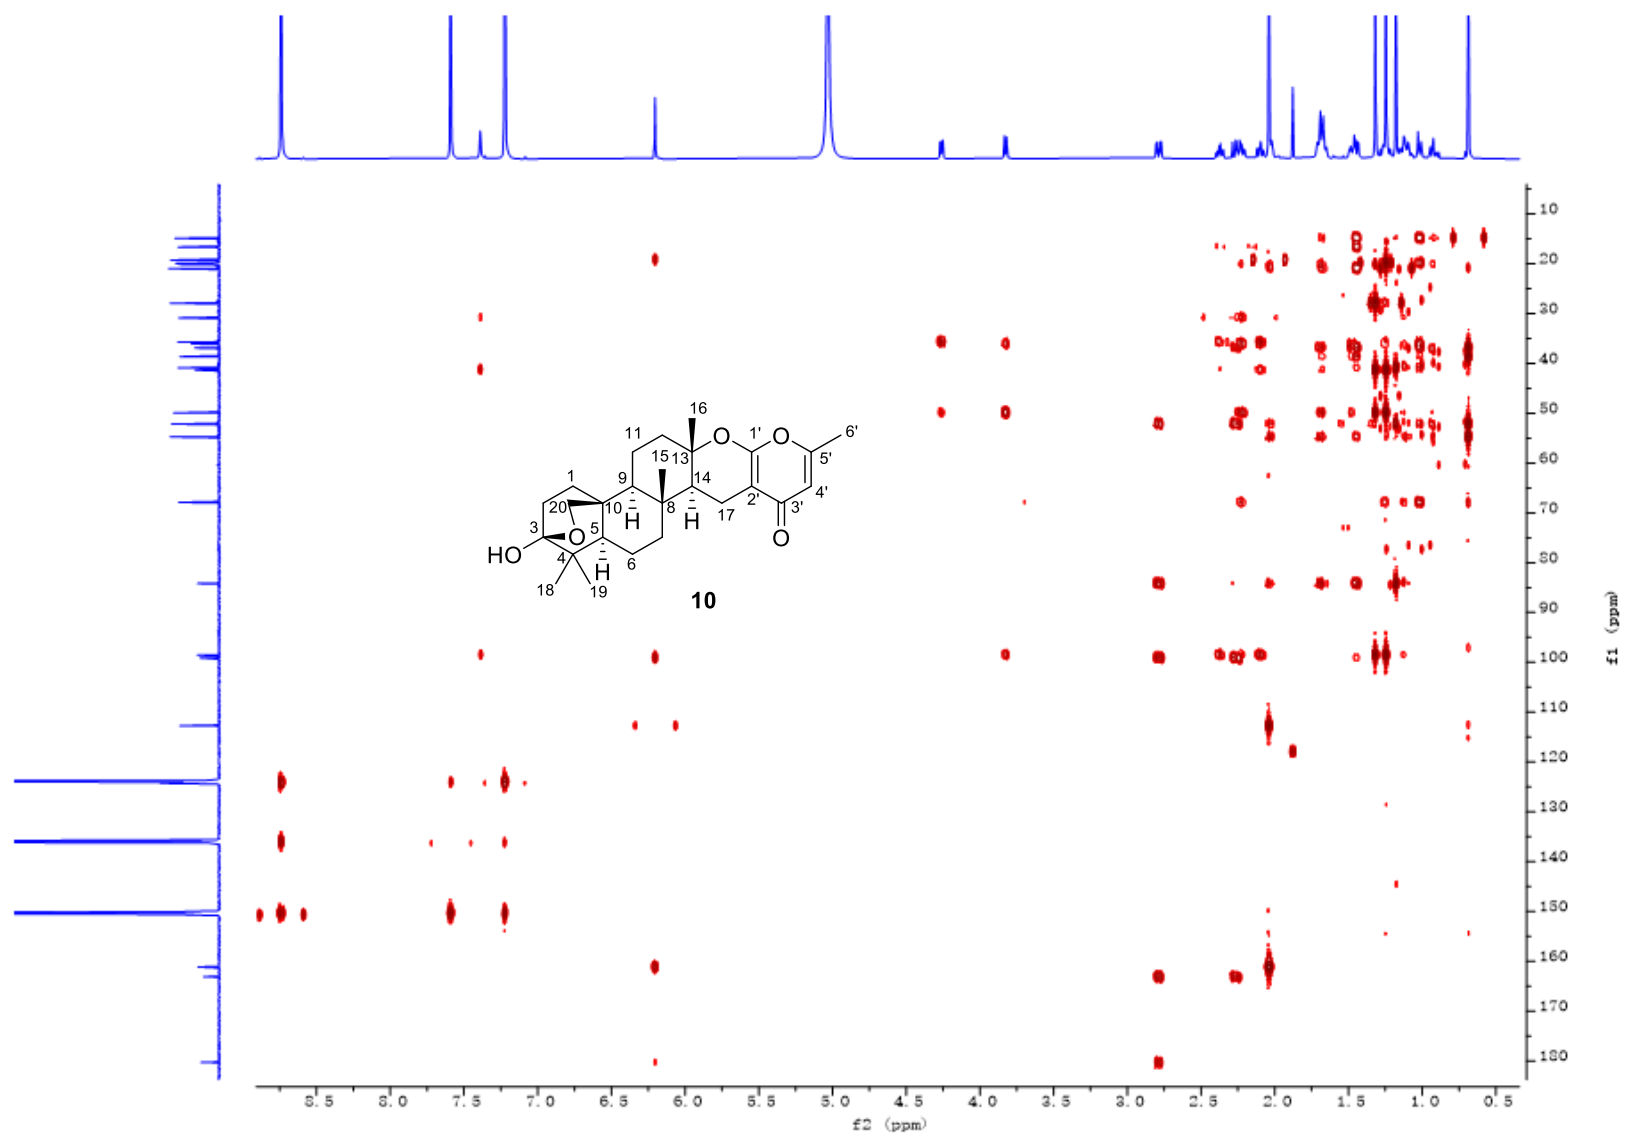

Figure S8. HMBC spectrum of chevalone N (**10**).

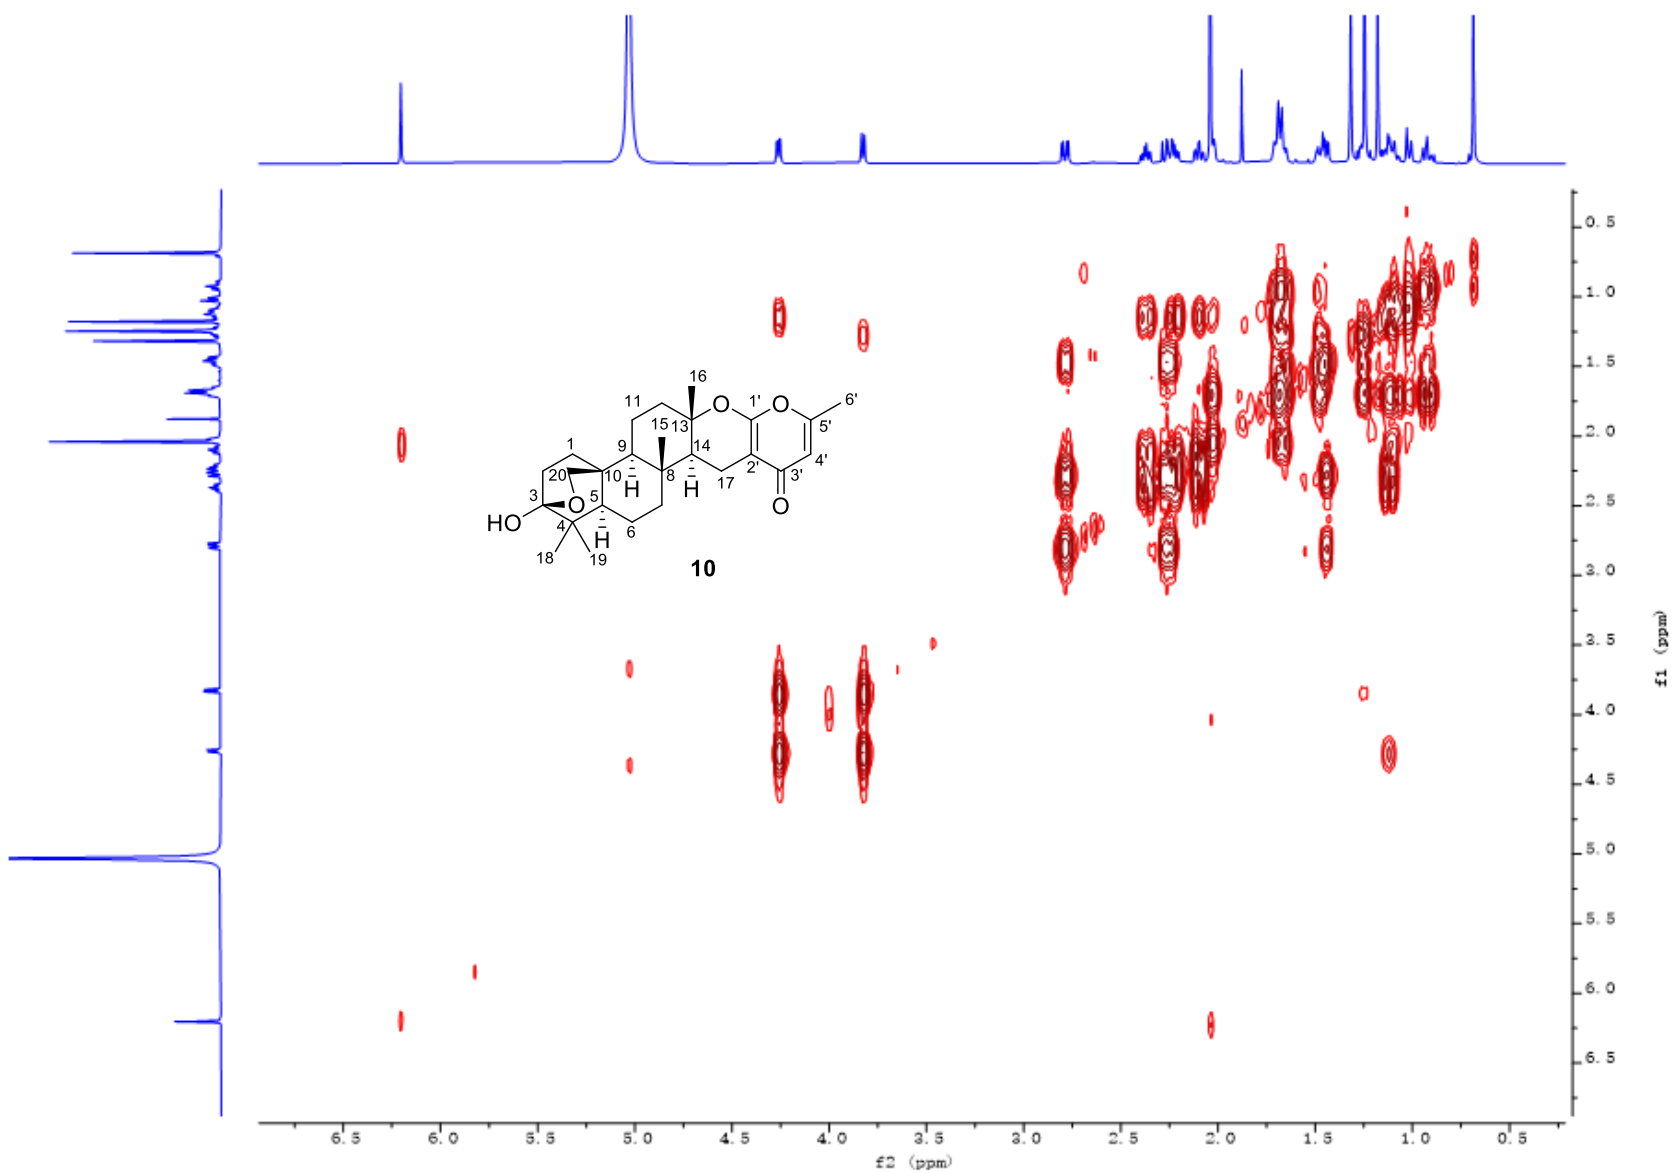

Figure S9.  $^1\text{H}$ - $^1\text{H}$  COSY spectrum of chevalone N (**10**).



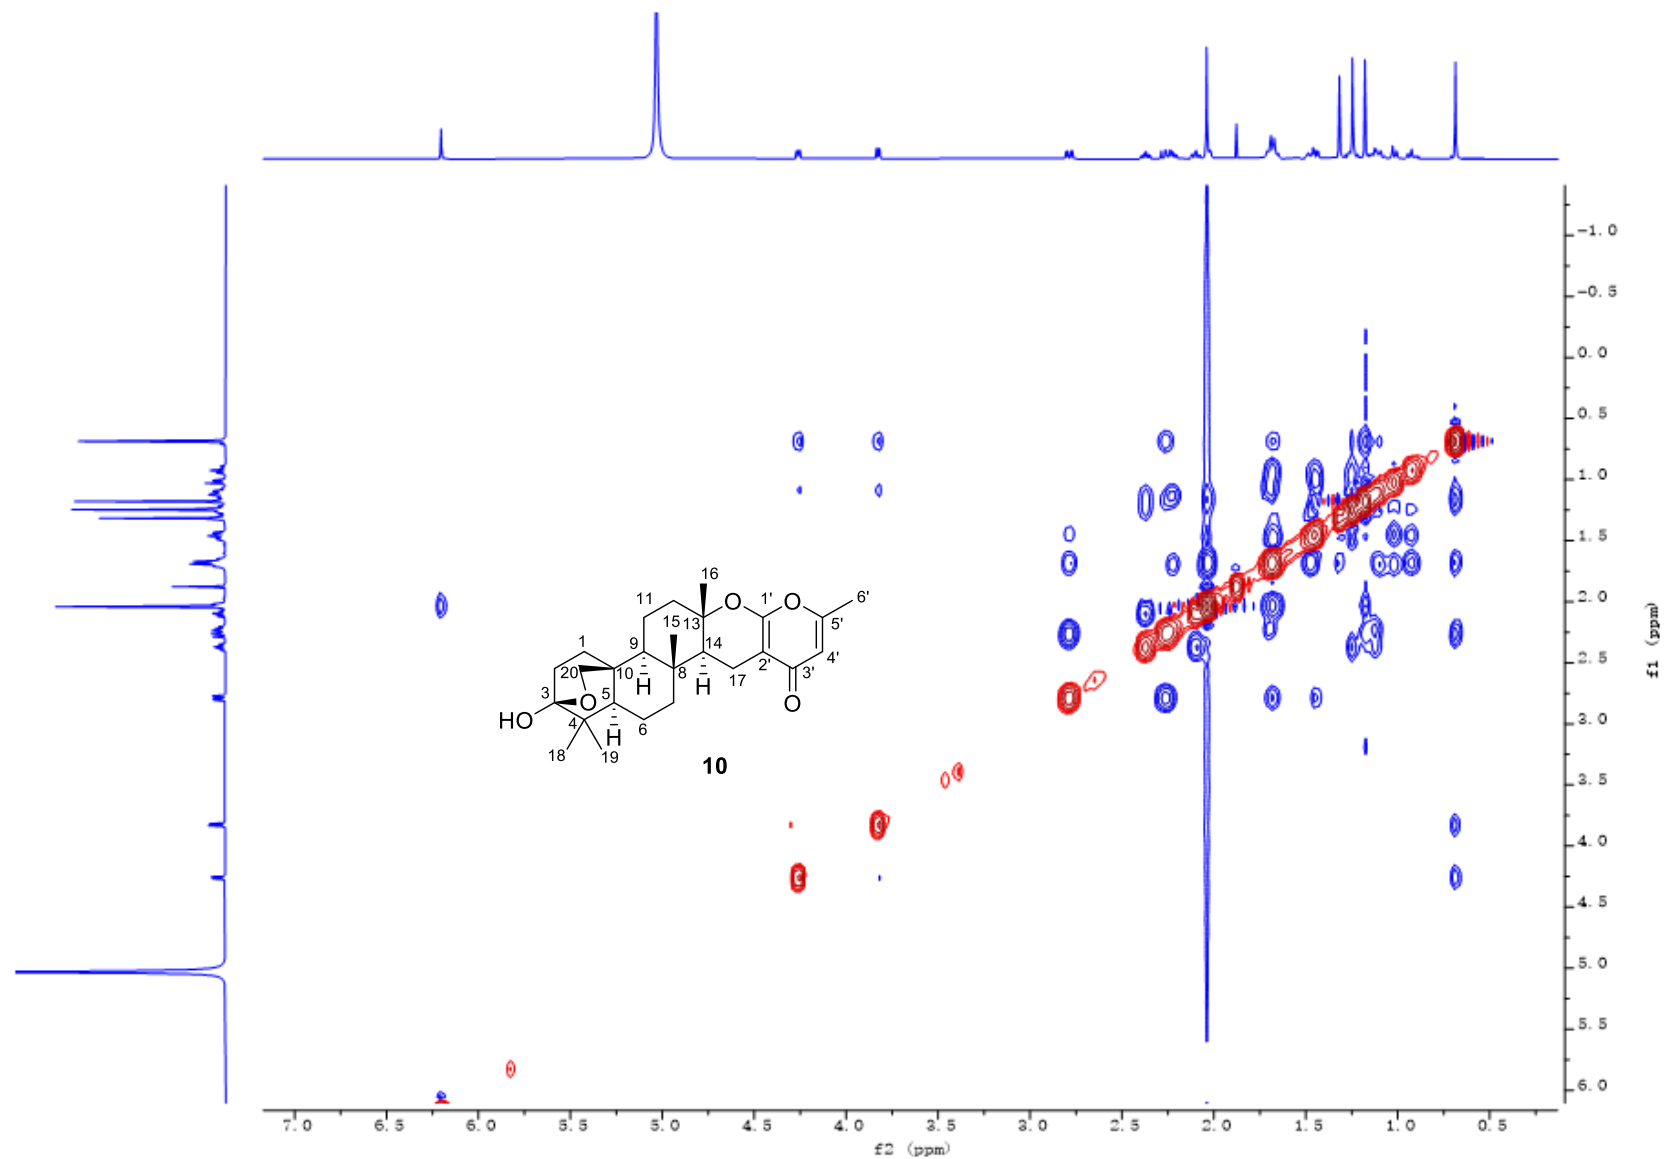

Figure S10. ROESY spectrum of chevalone N (**10**).

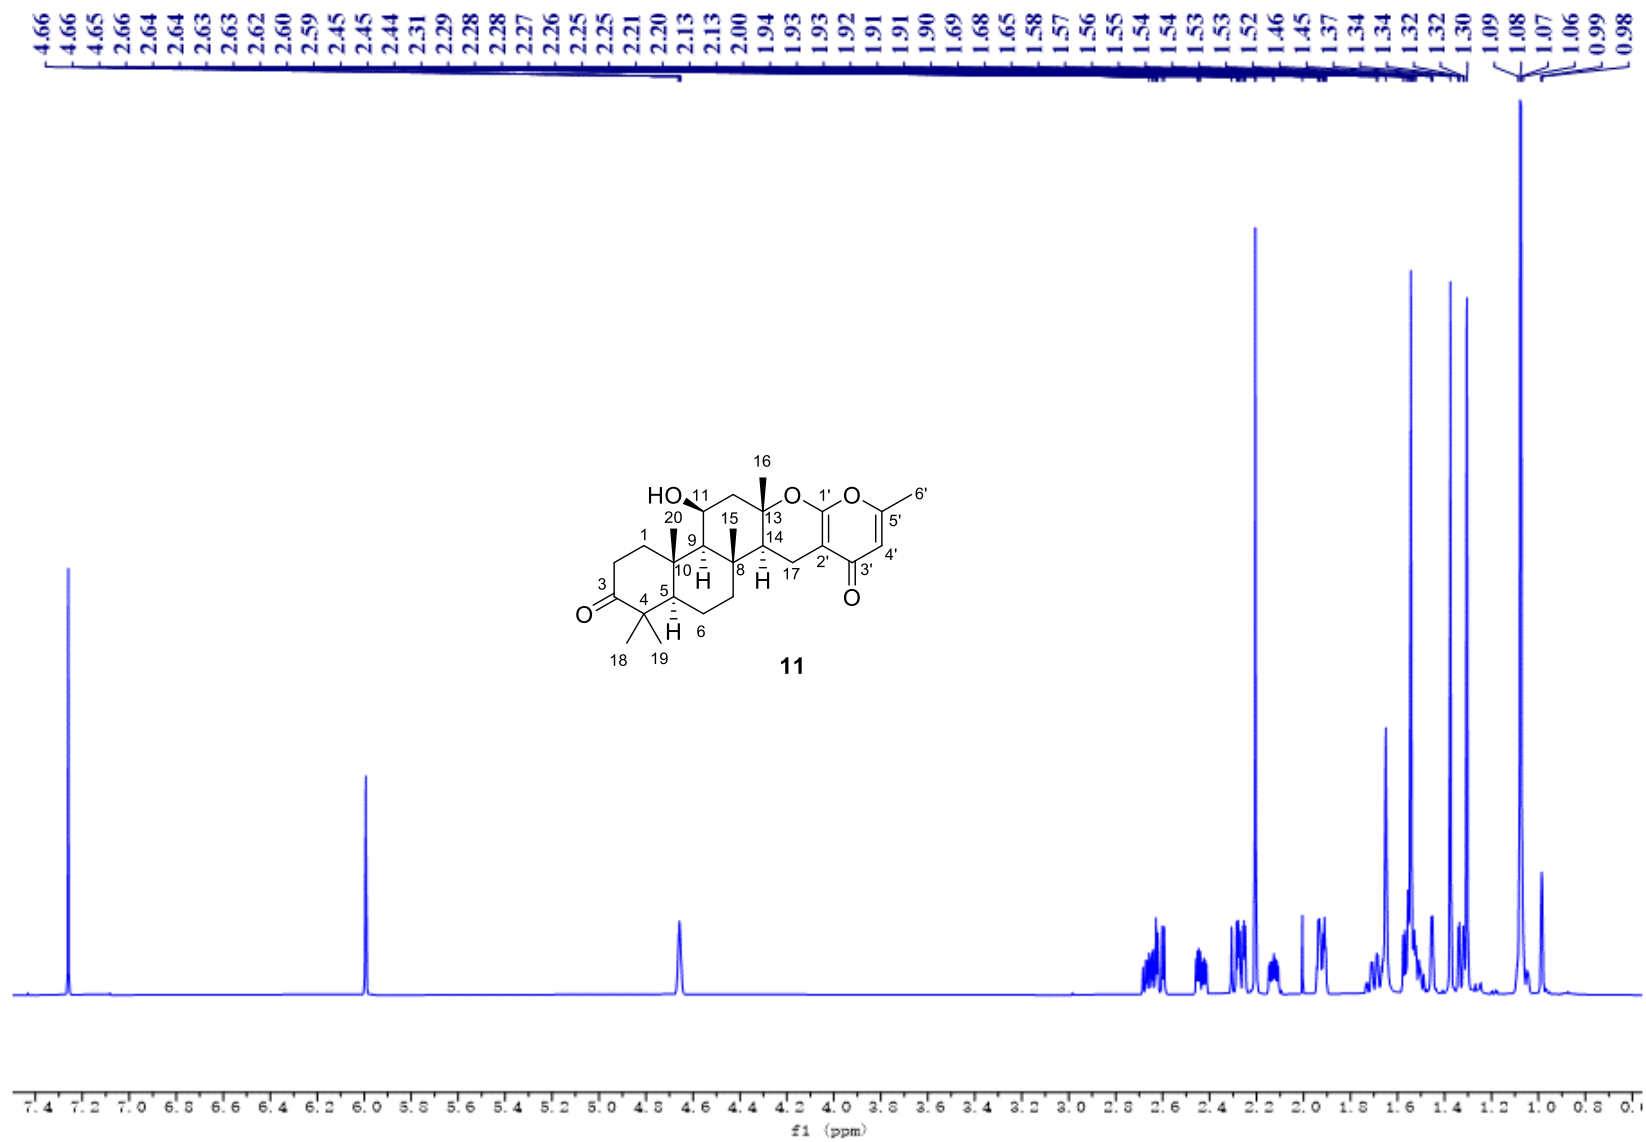

Figure S11. <sup>1</sup>H NMR spectrum of chevalone O (**11**).

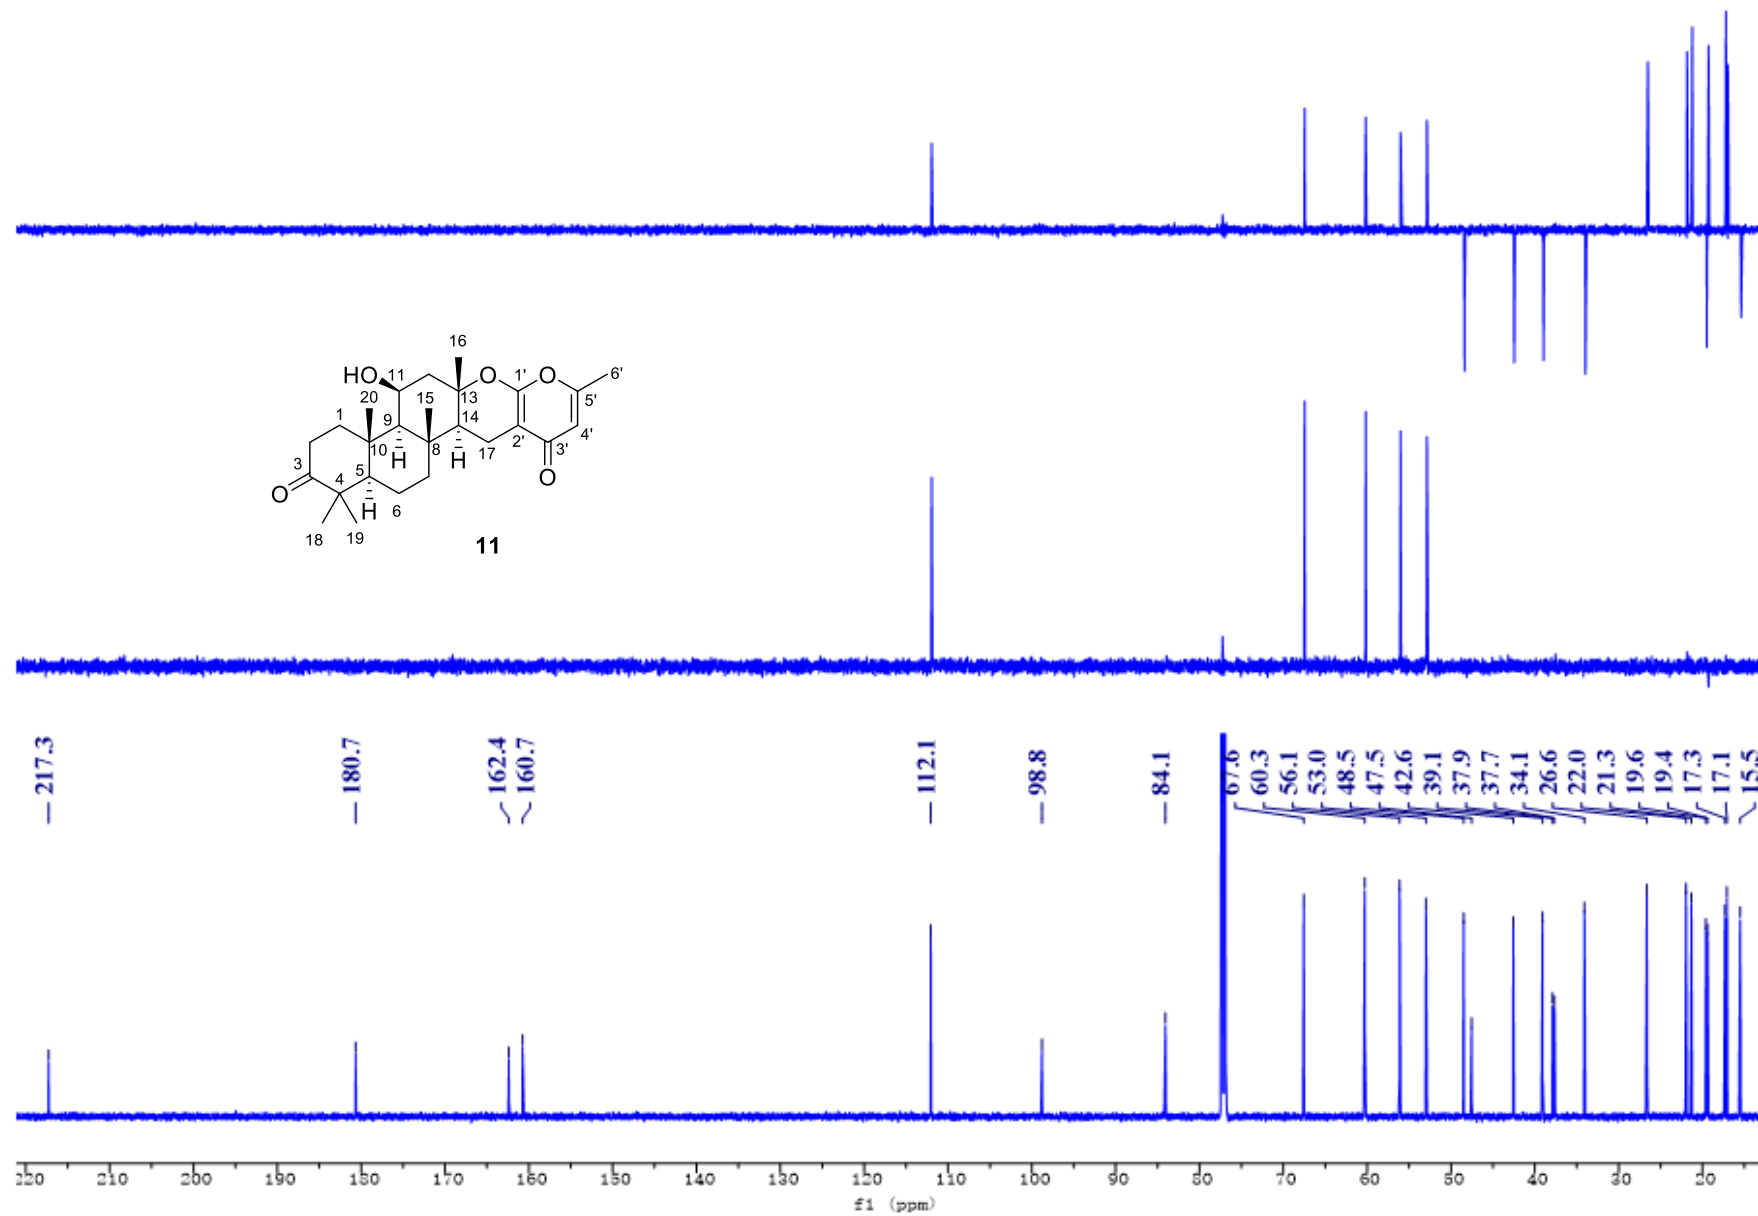

Figure S12. <sup>13</sup>C NMR spectrum of chevalone O (11).

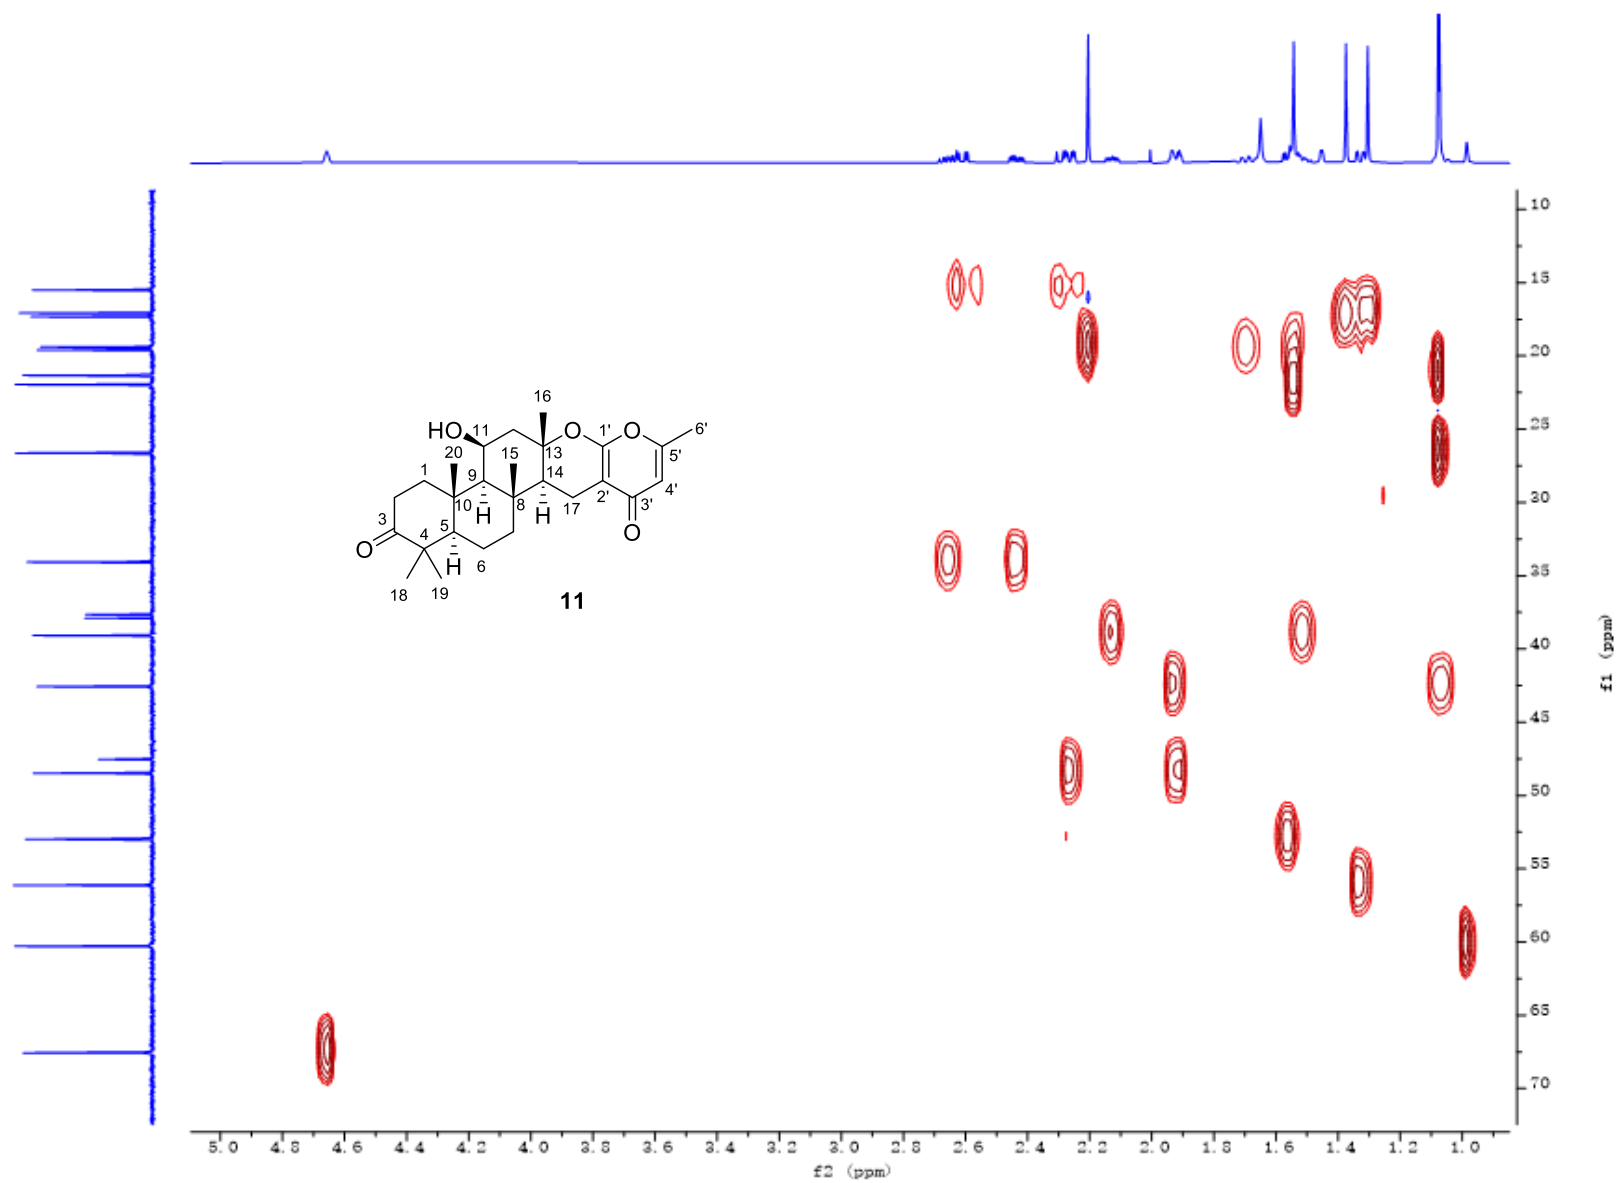

Figure S13. HSQC spectrum of chevalone O (**11**).

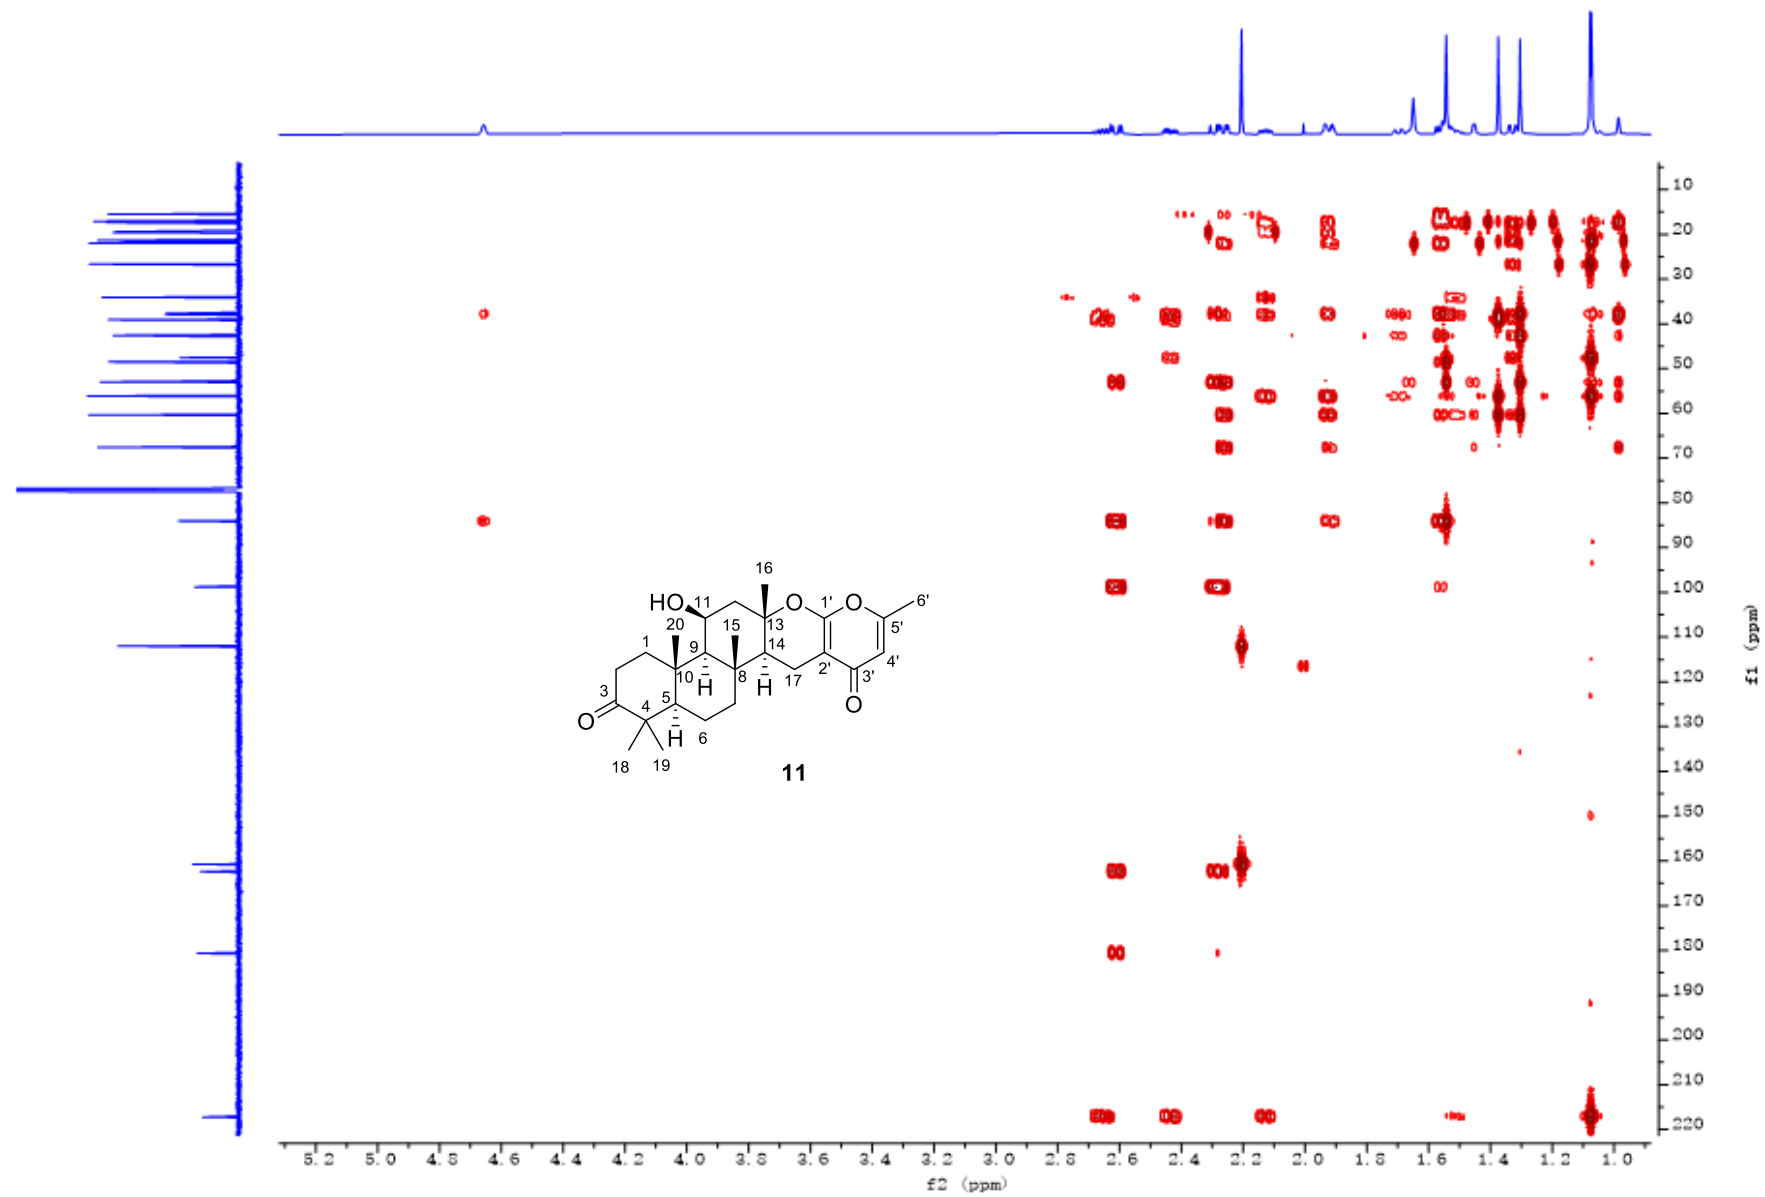

Figure S14. HMBC spectrum of chevalone O (**11**).

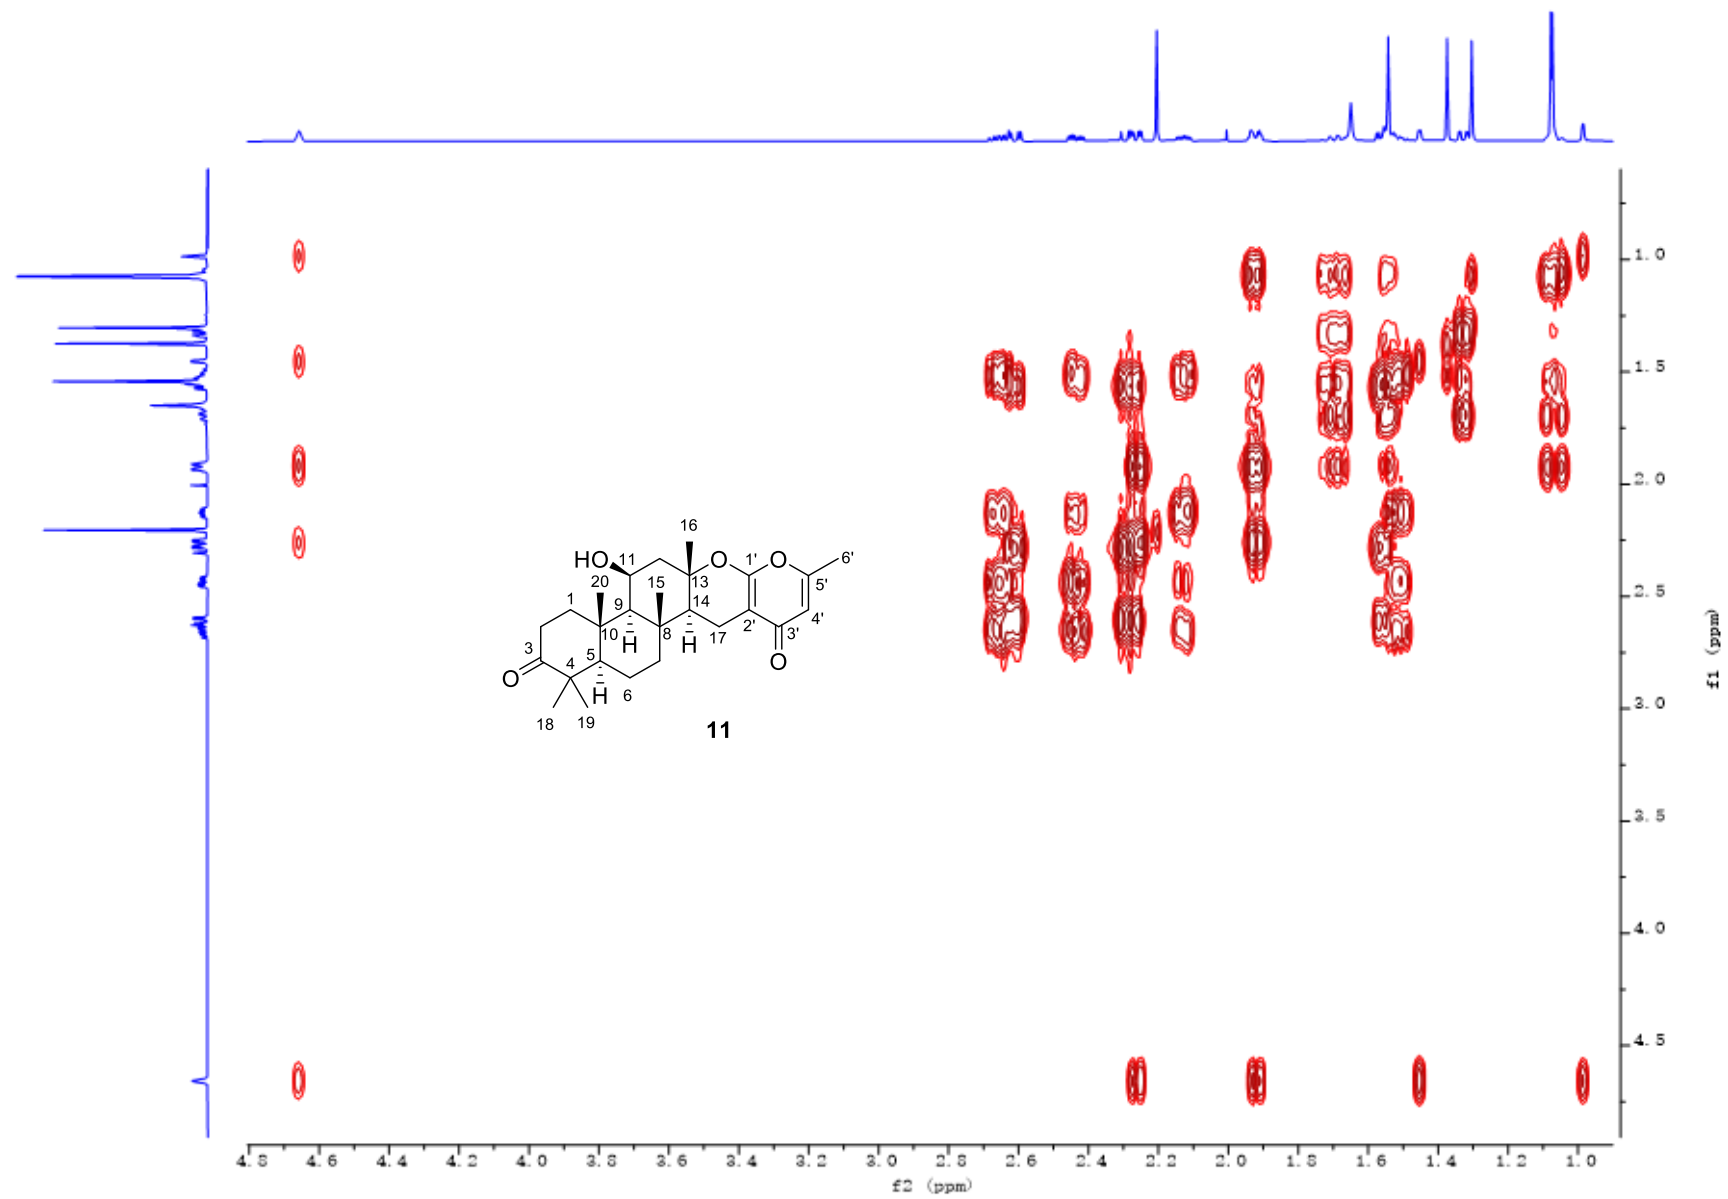

Figure S15.  $^1\text{H}$ - $^1\text{H}$  COSY spectrum of chevalone O (**11**).

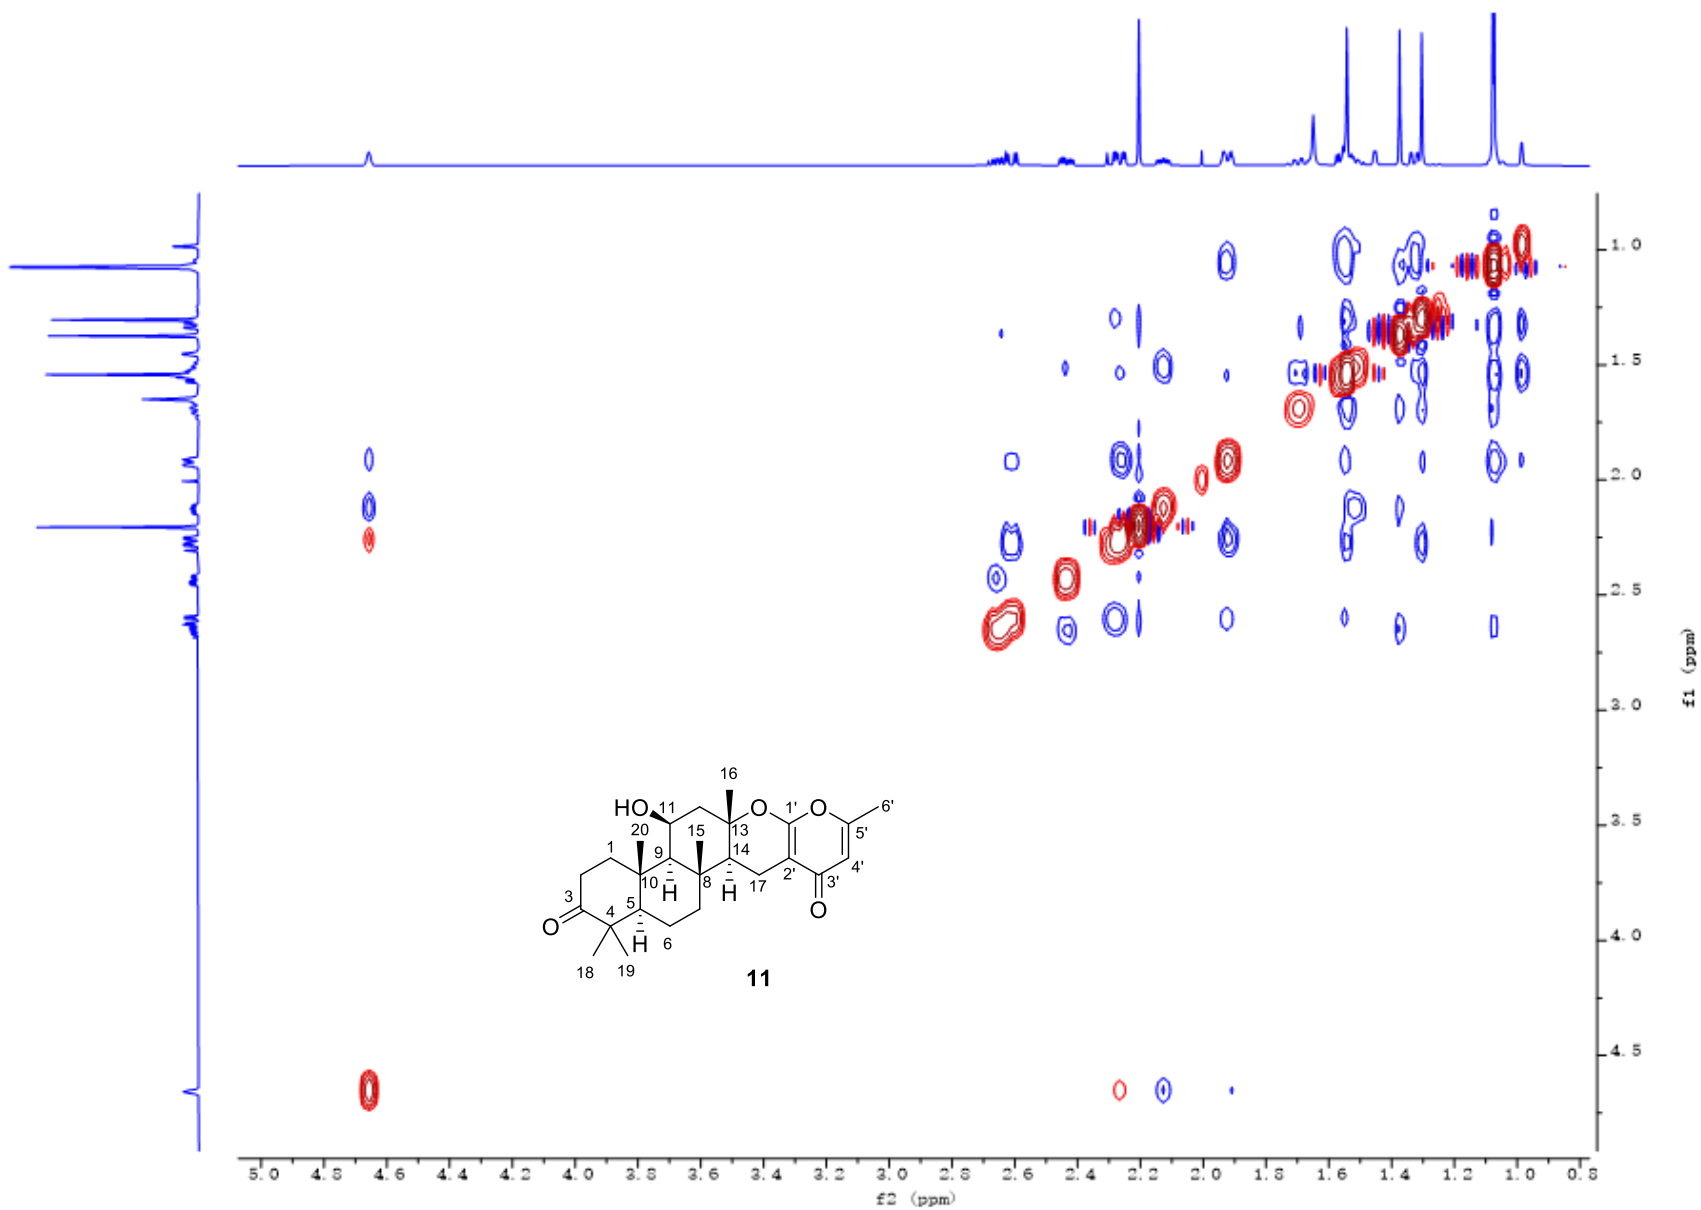

Figure S16. ROESY spectrum of chevalone O (**11**).

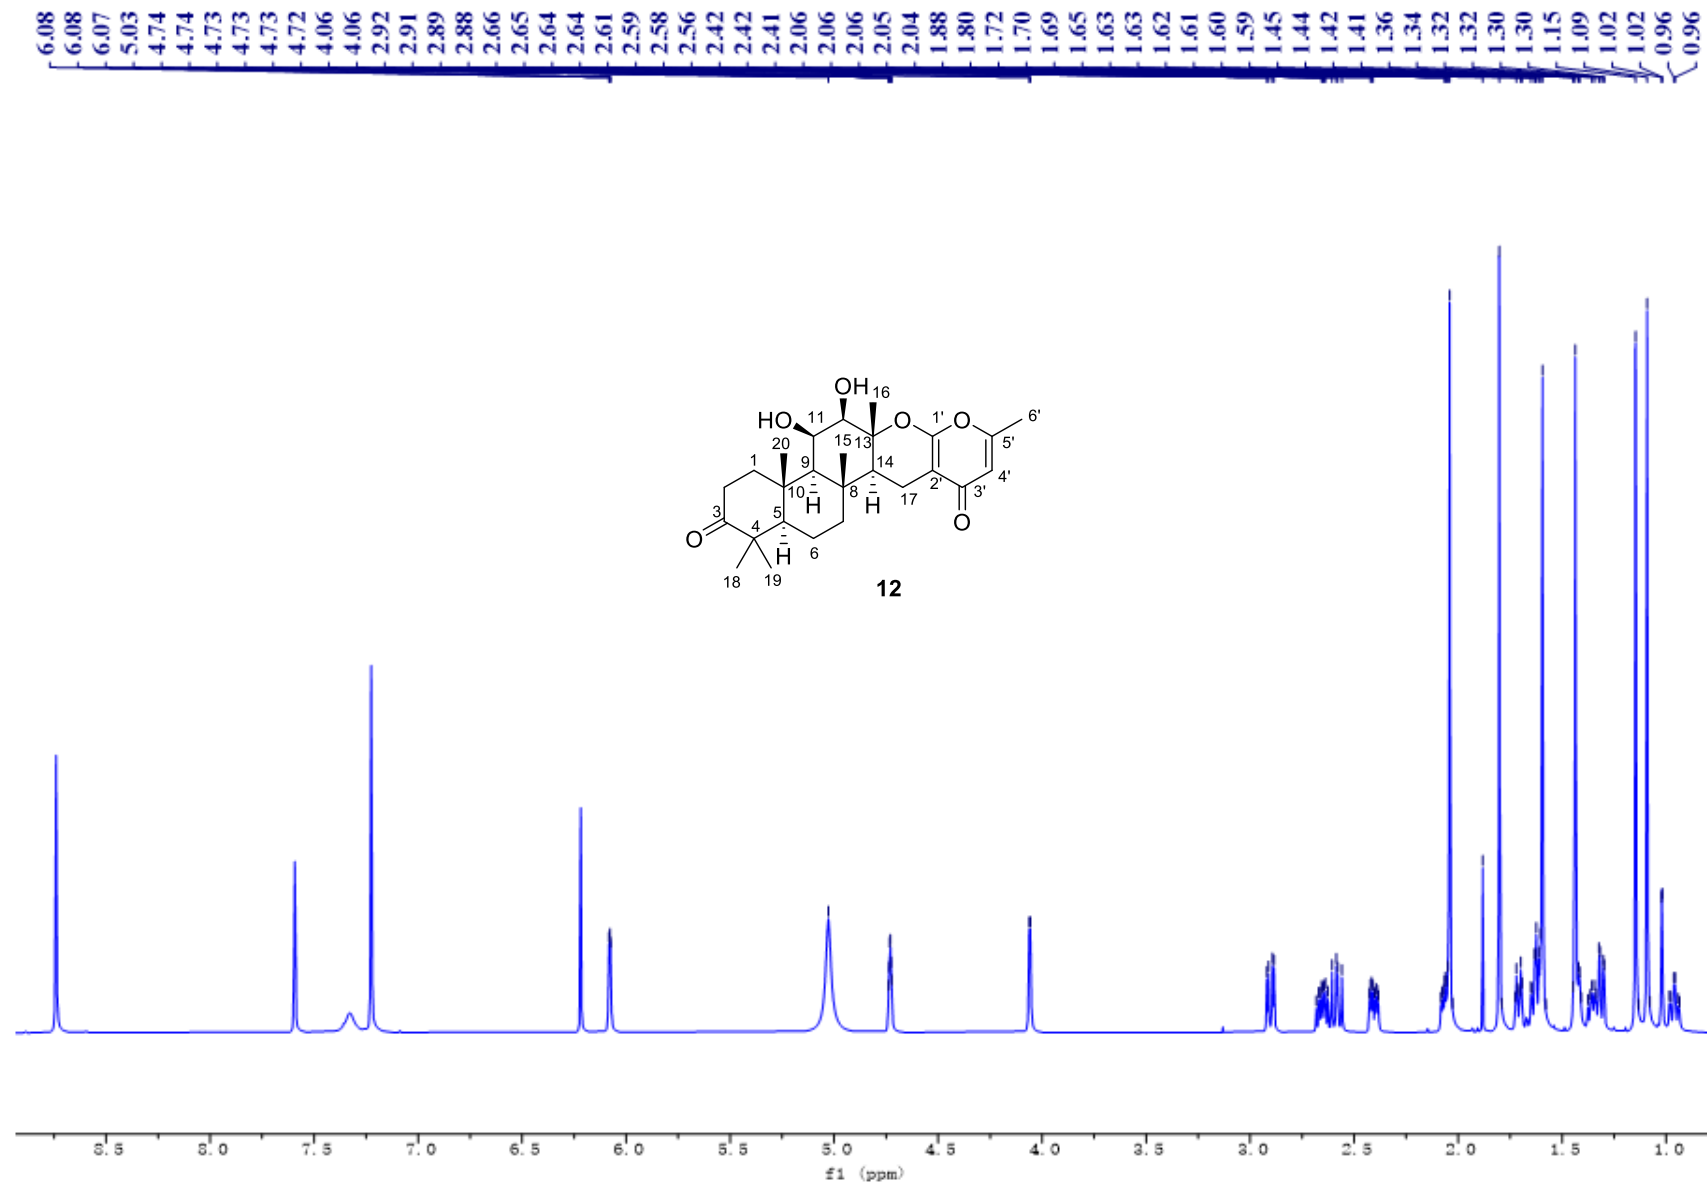

Figure S17. <sup>1</sup>H NMR spectrum of chevalone P (12).



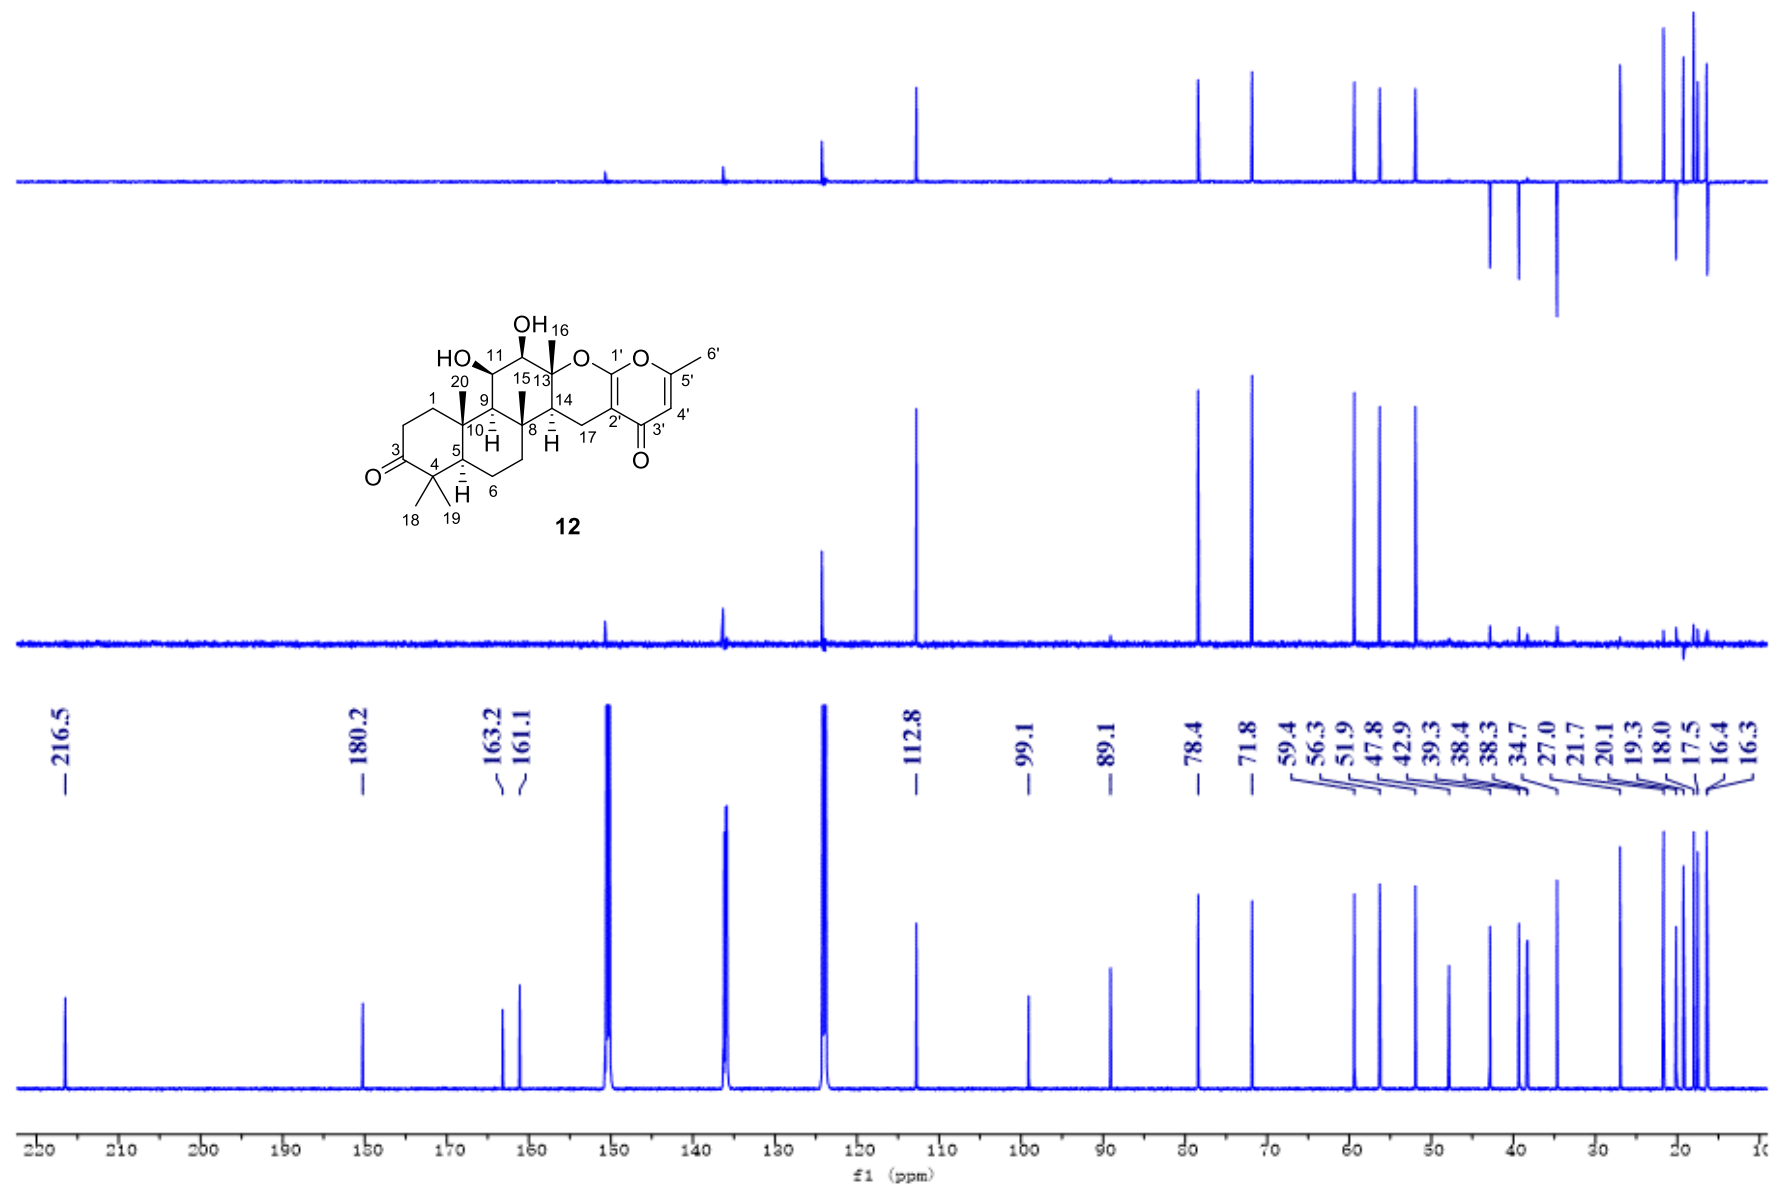

Figure S18. <sup>13</sup>C NMR spectrum of chevalone P (**12**).

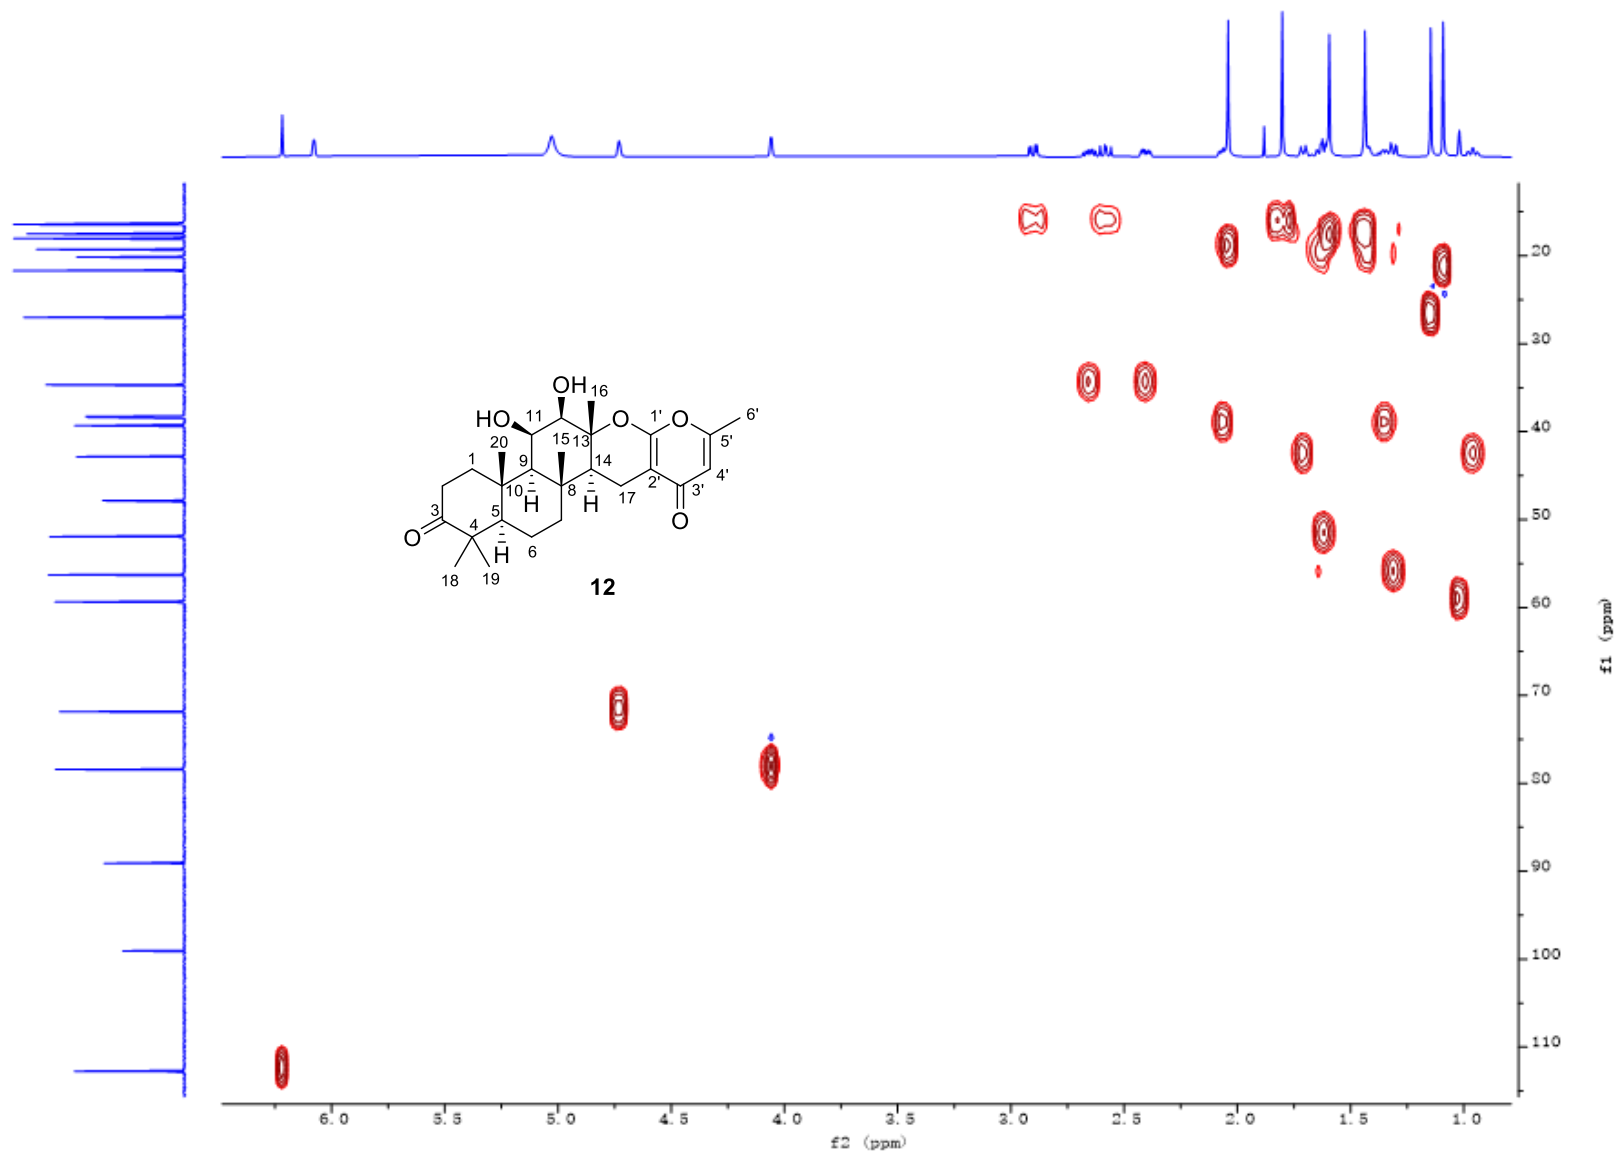

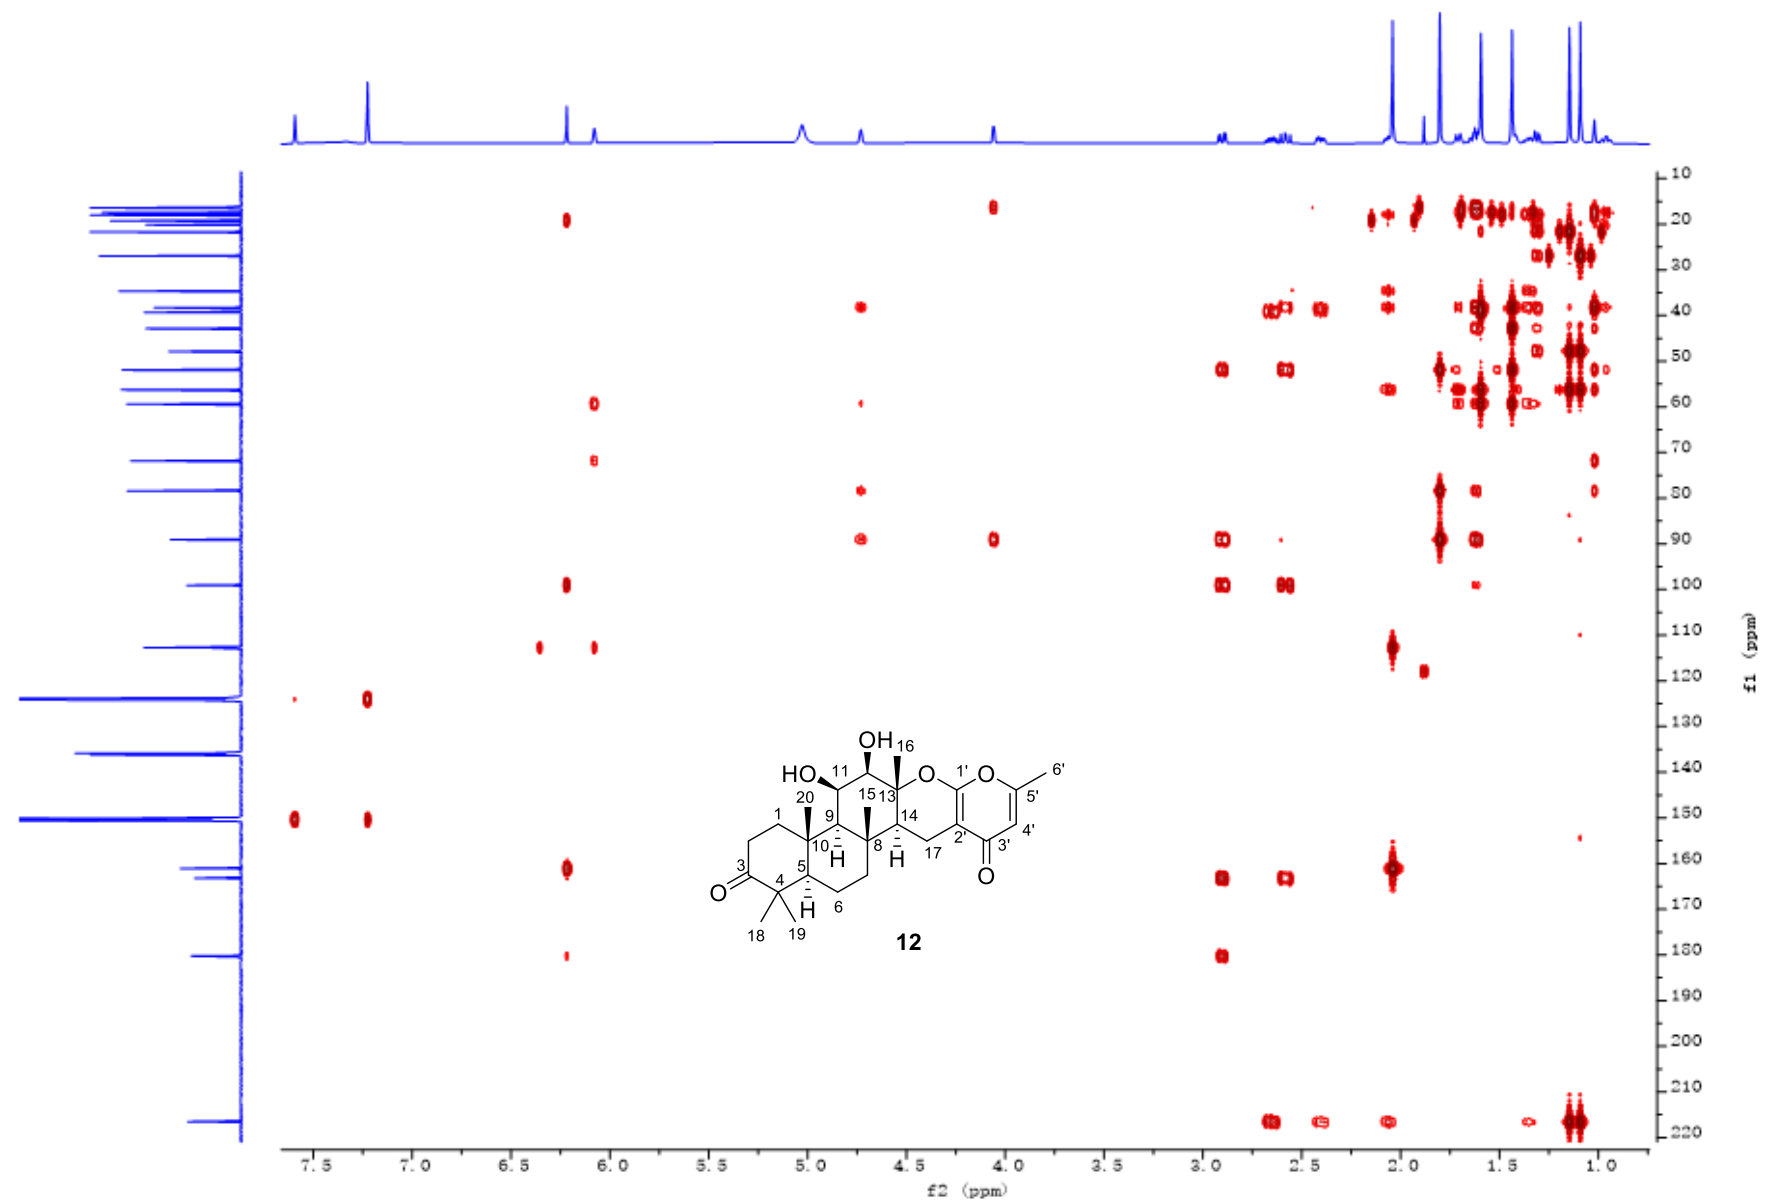

Figure S20. HMBC spectrum of chevalone P (12).

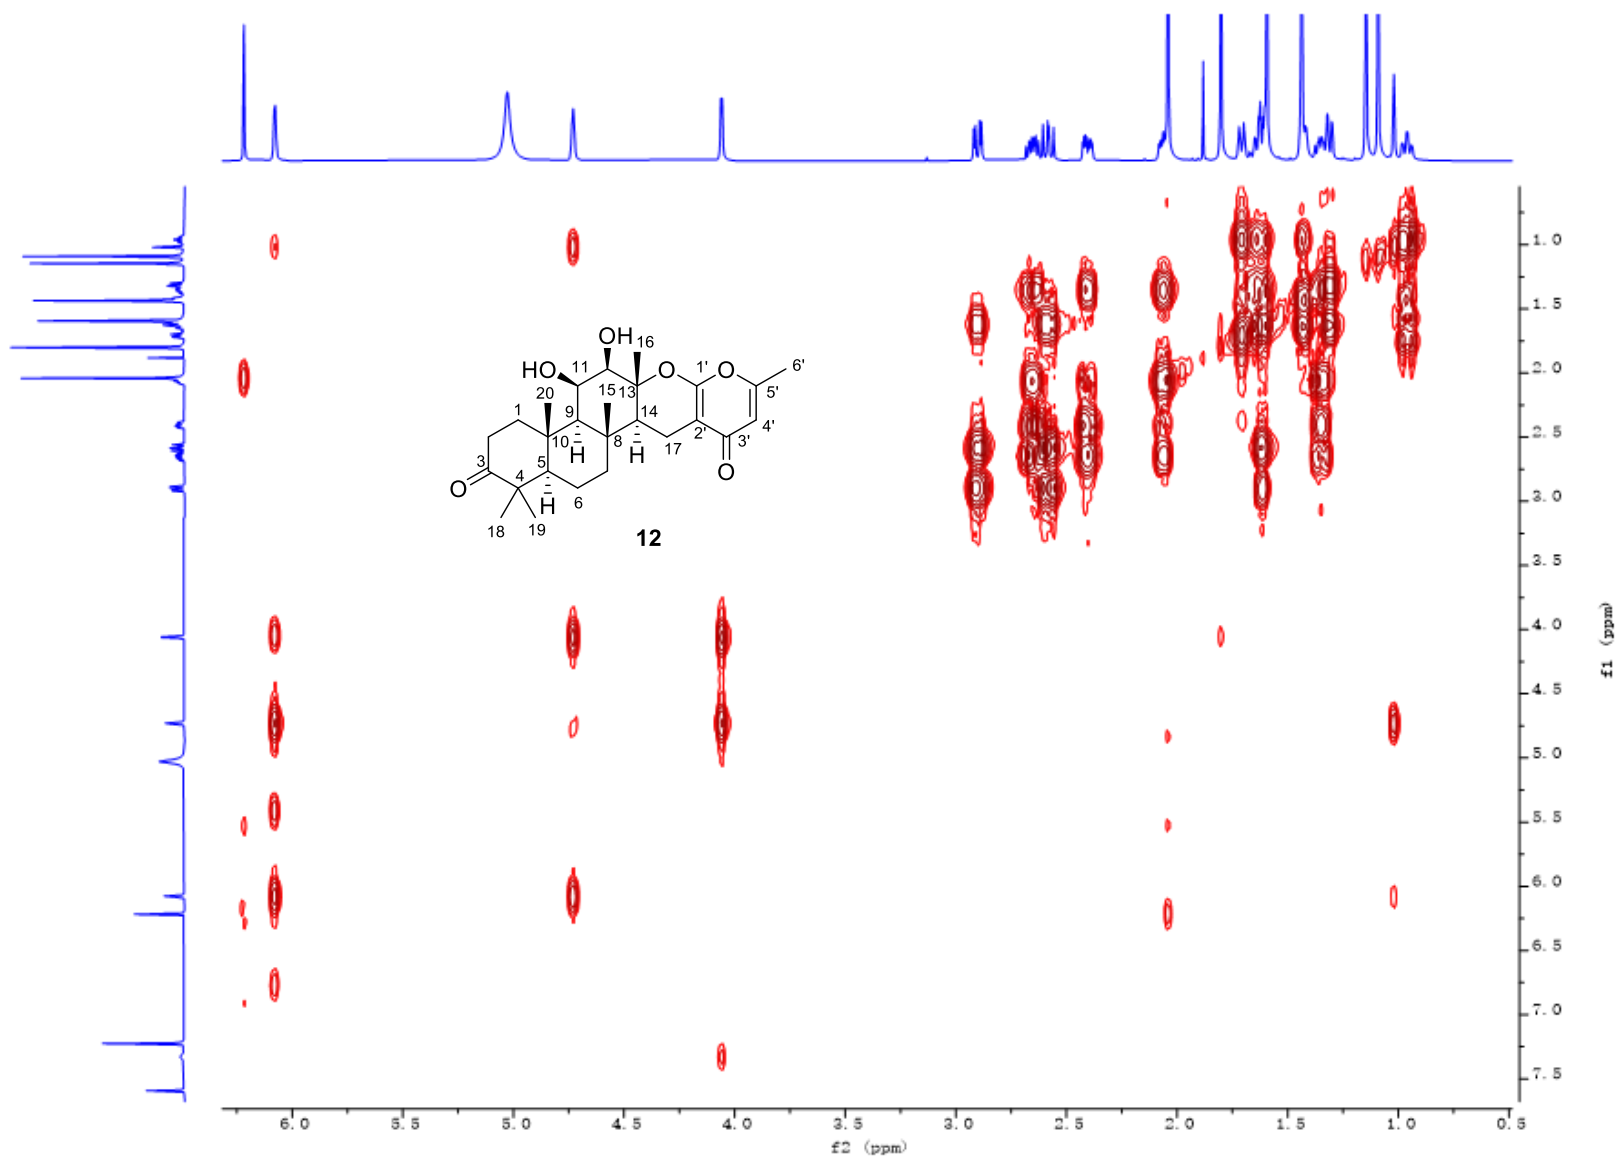

Figure S21.  $^1\text{H}$ - $^1\text{H}$  COSY spectrum of chevalone P (**12**).

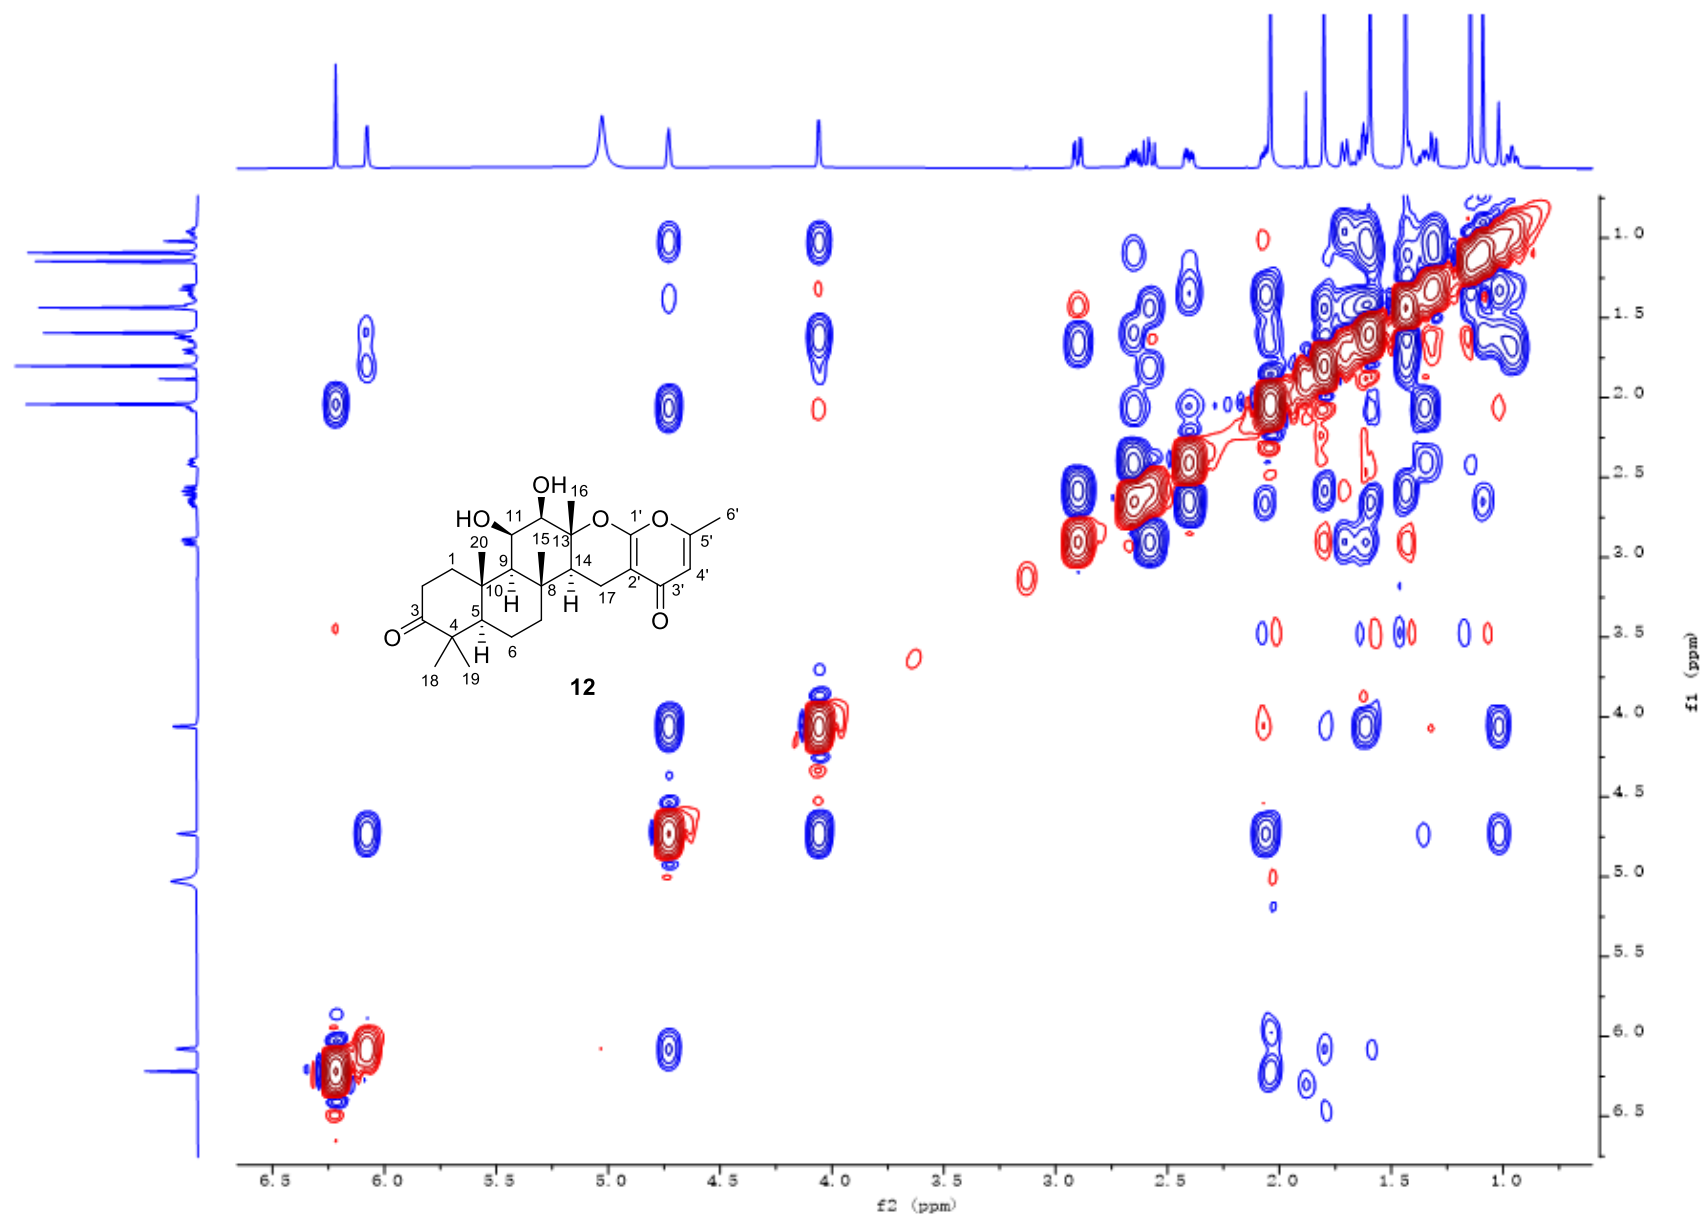

Figure S22. ROESY spectrum of chevalone P (12).

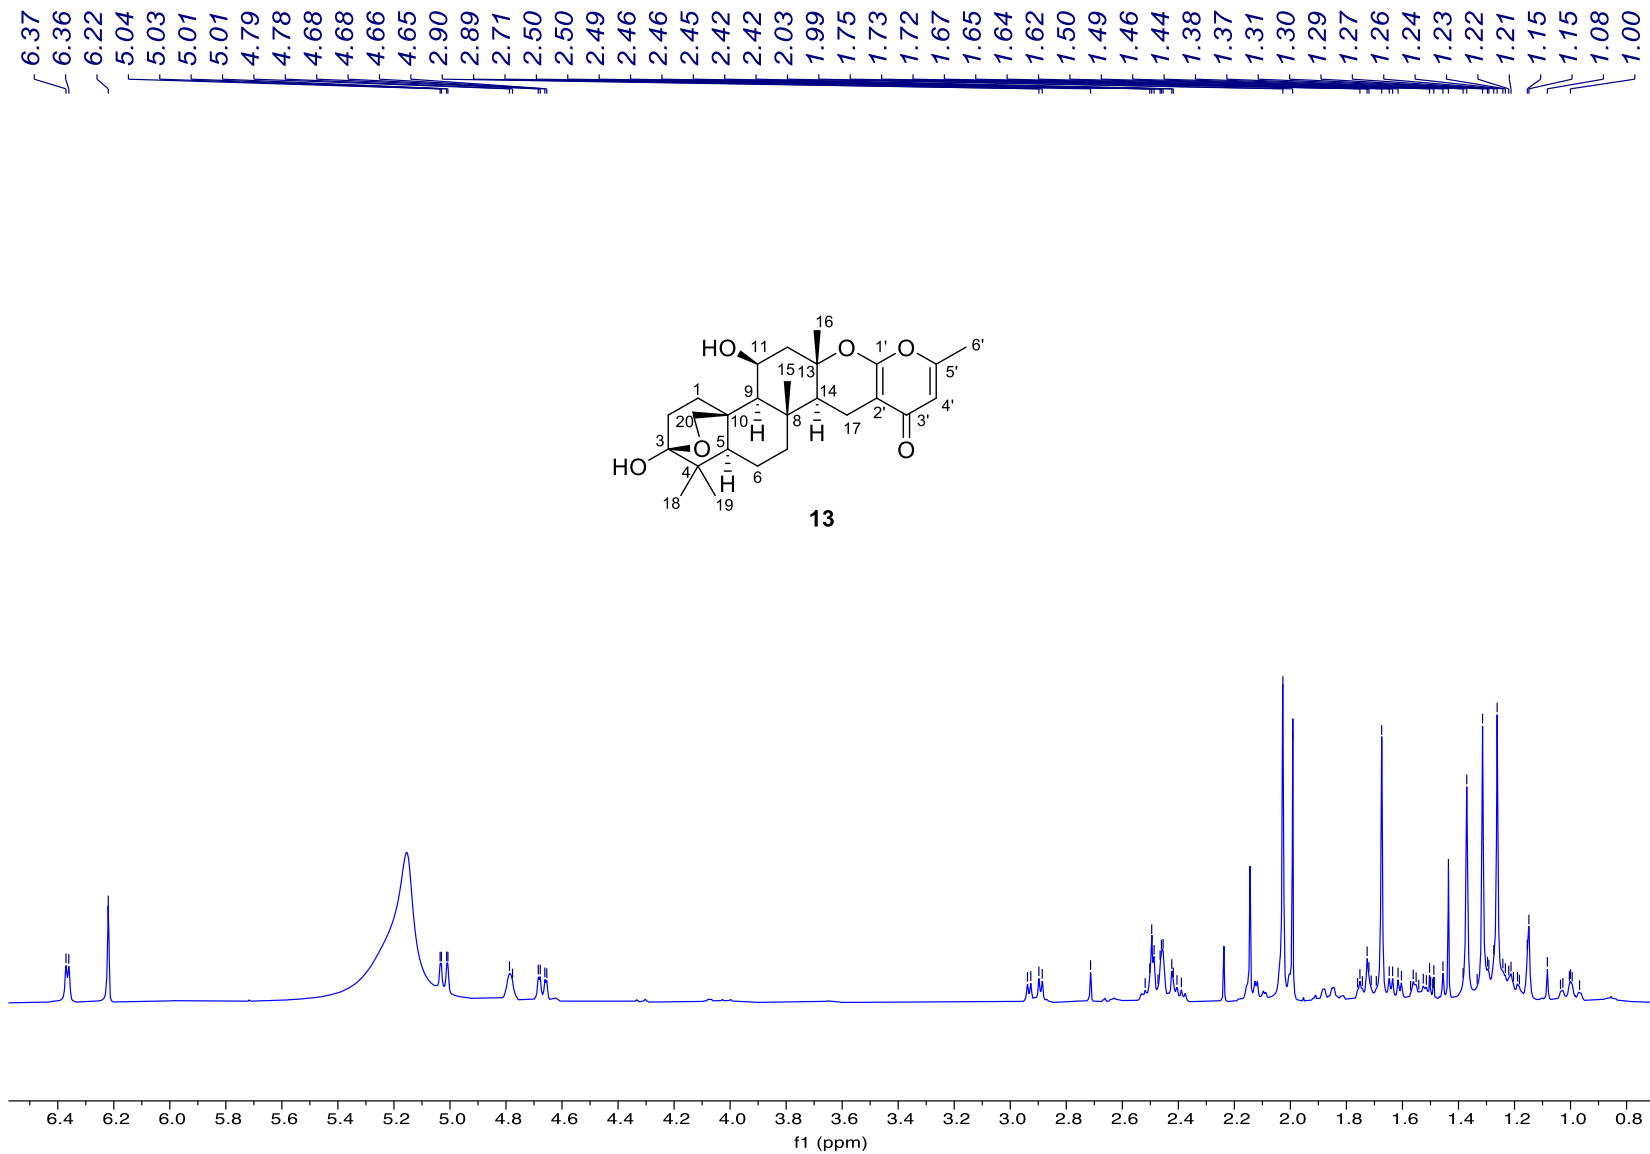

Figure S23. <sup>1</sup>H NMR spectrum of chevalone Q (**13**).

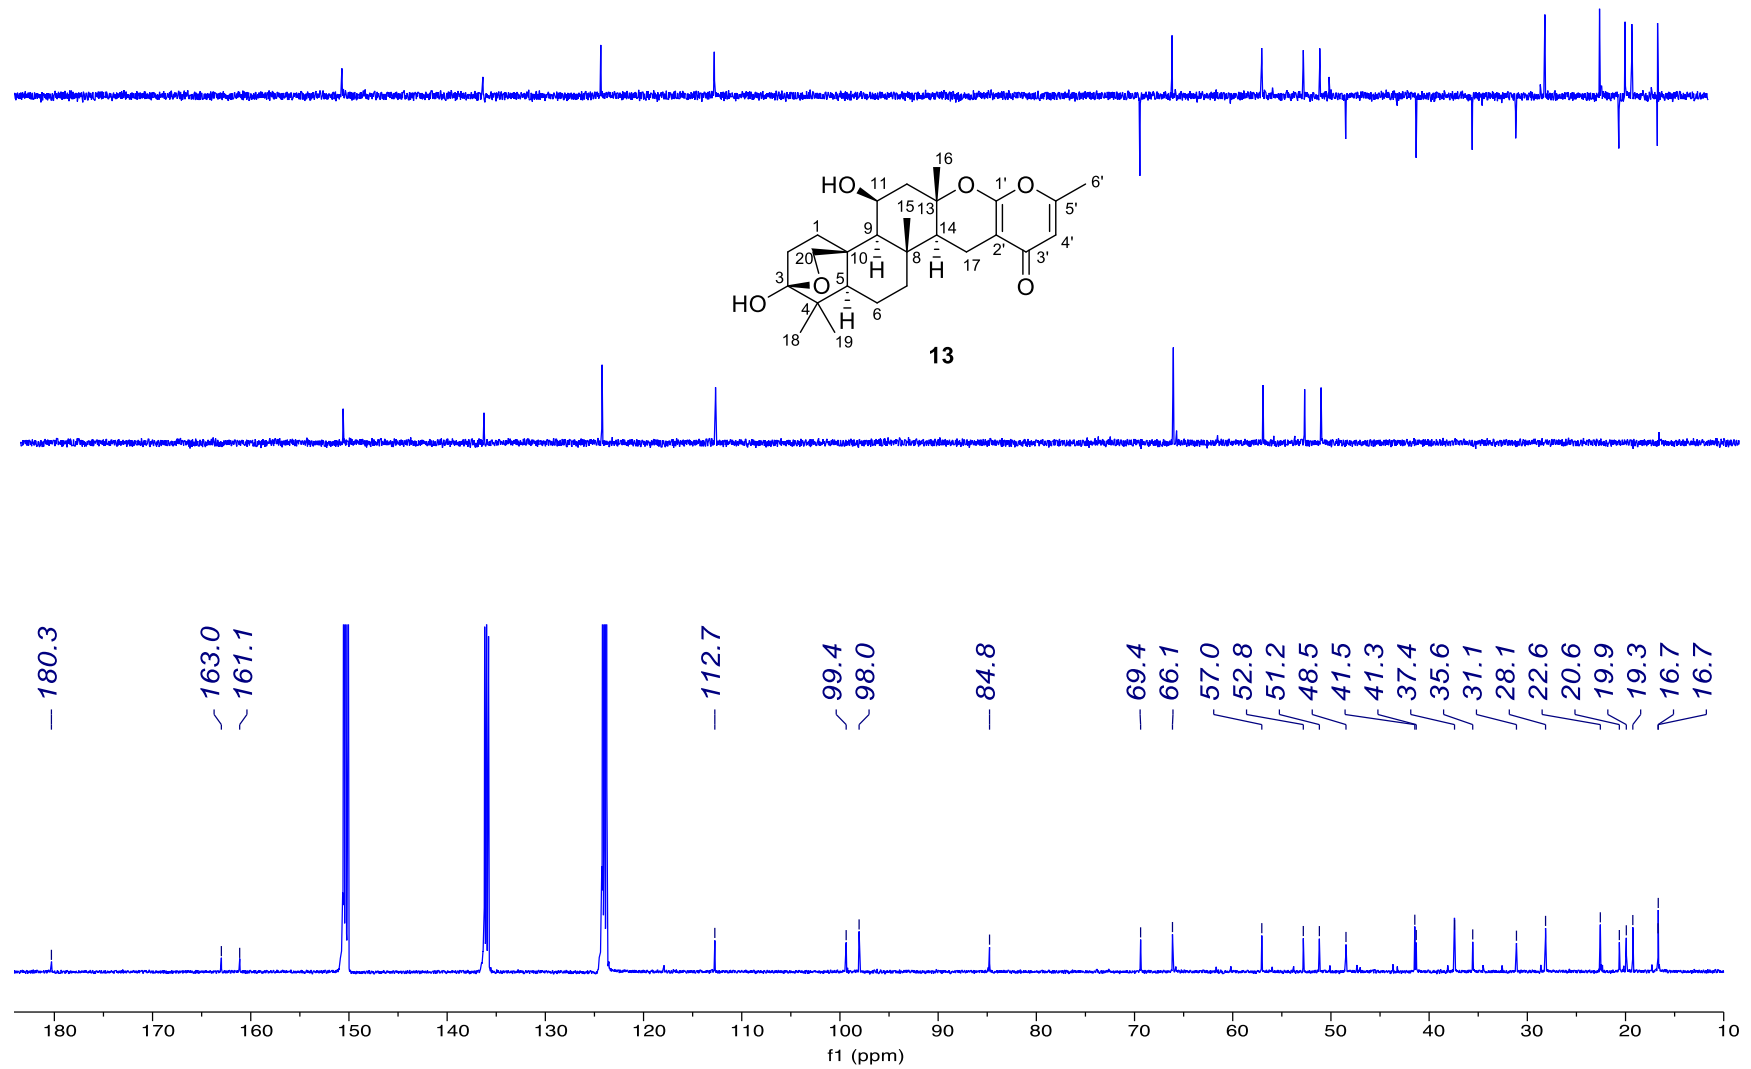

Figure S24. <sup>13</sup>C NMR spectrum of chevalone Q (13).

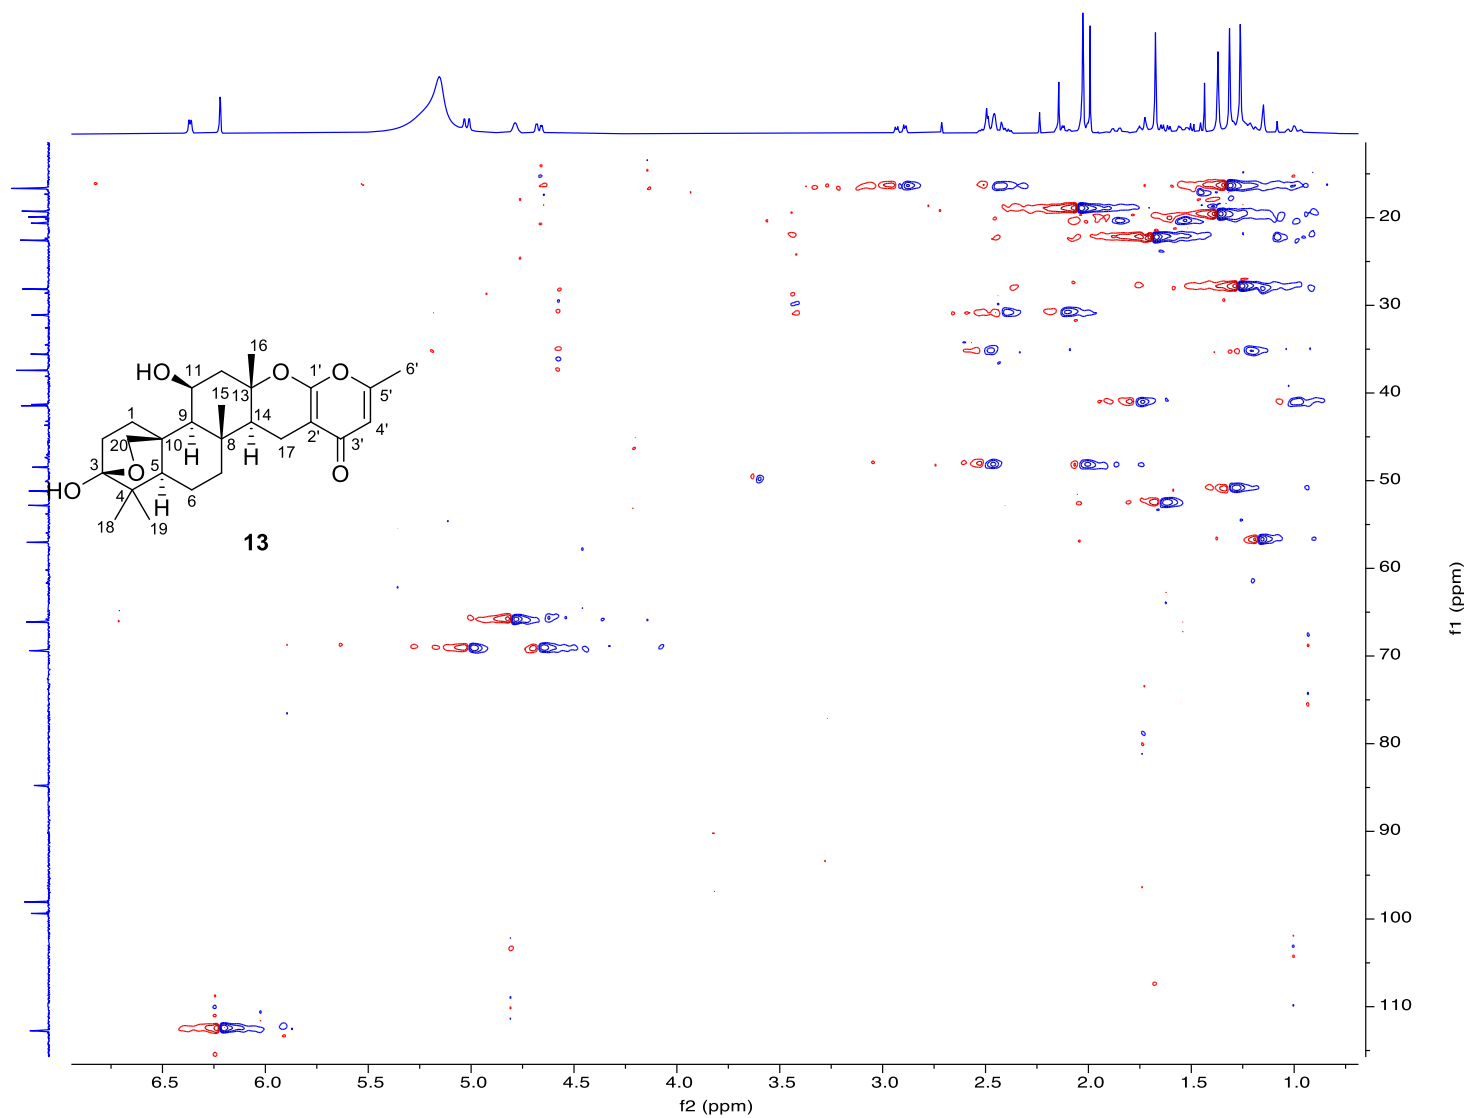

Figure S25. HSQC spectrum of chevalone Q (**13**).



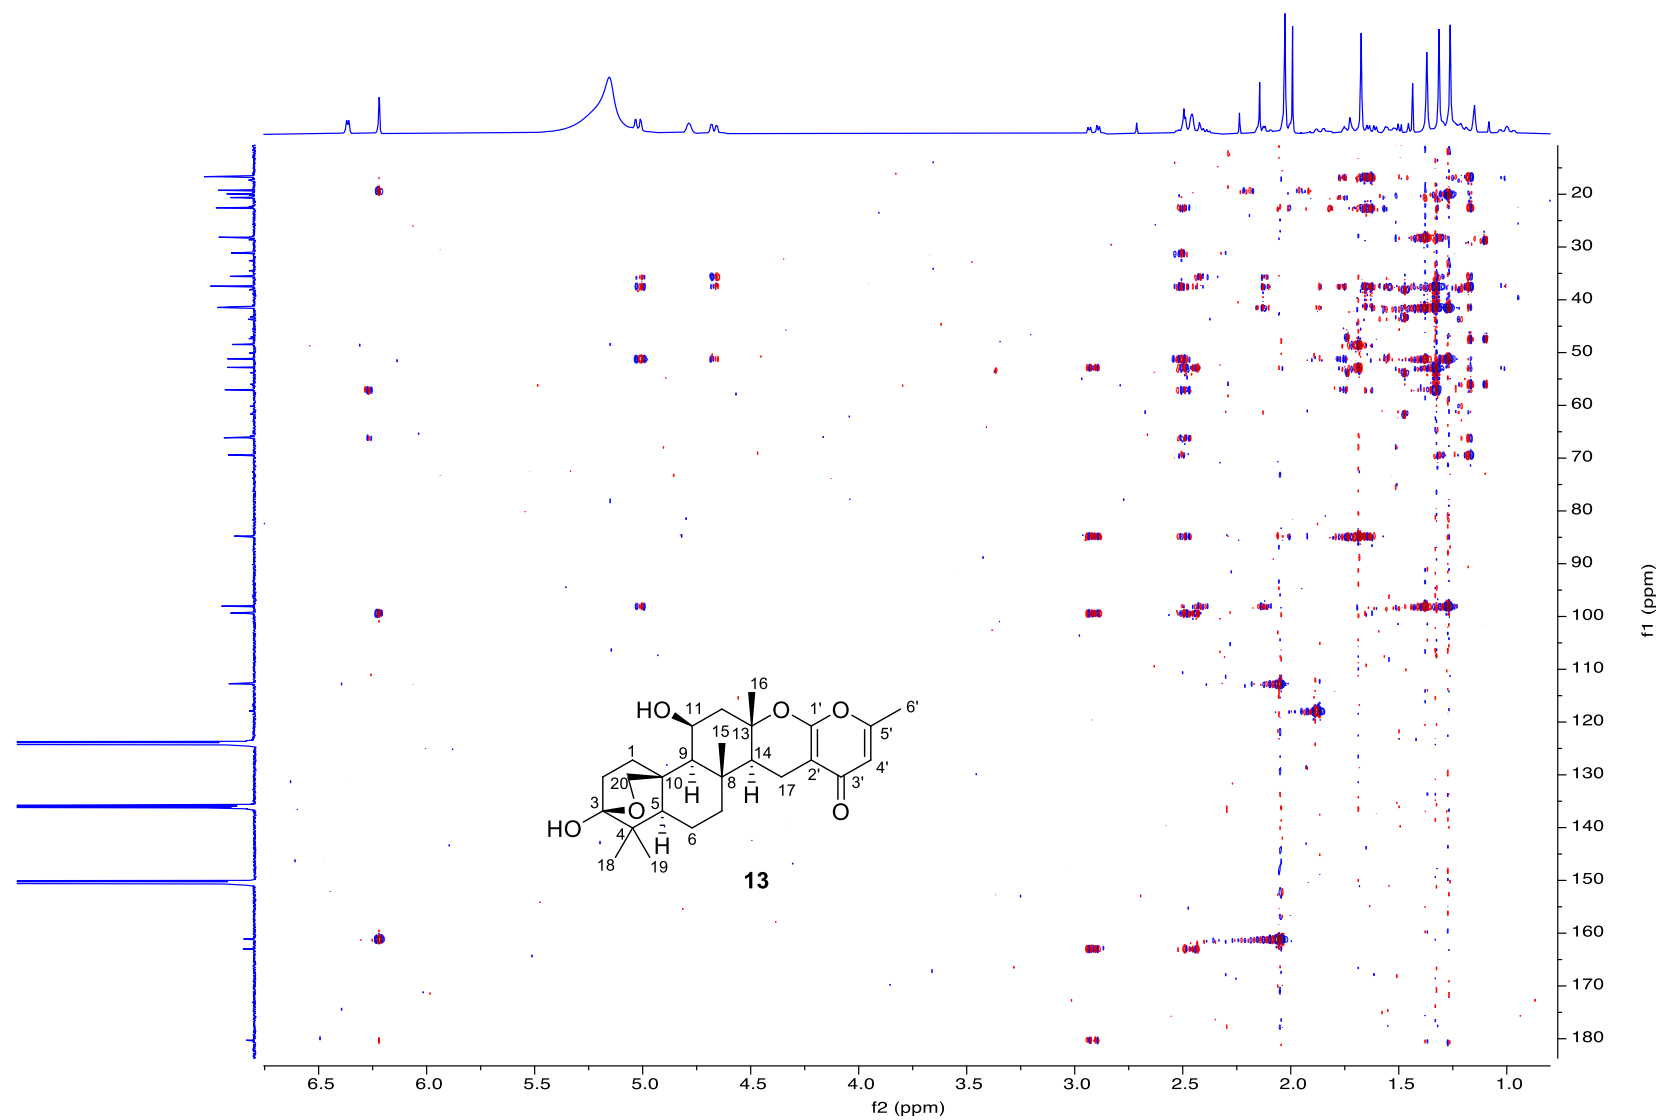

Figure S26. HMBC spectrum of chevalone Q (**13**).

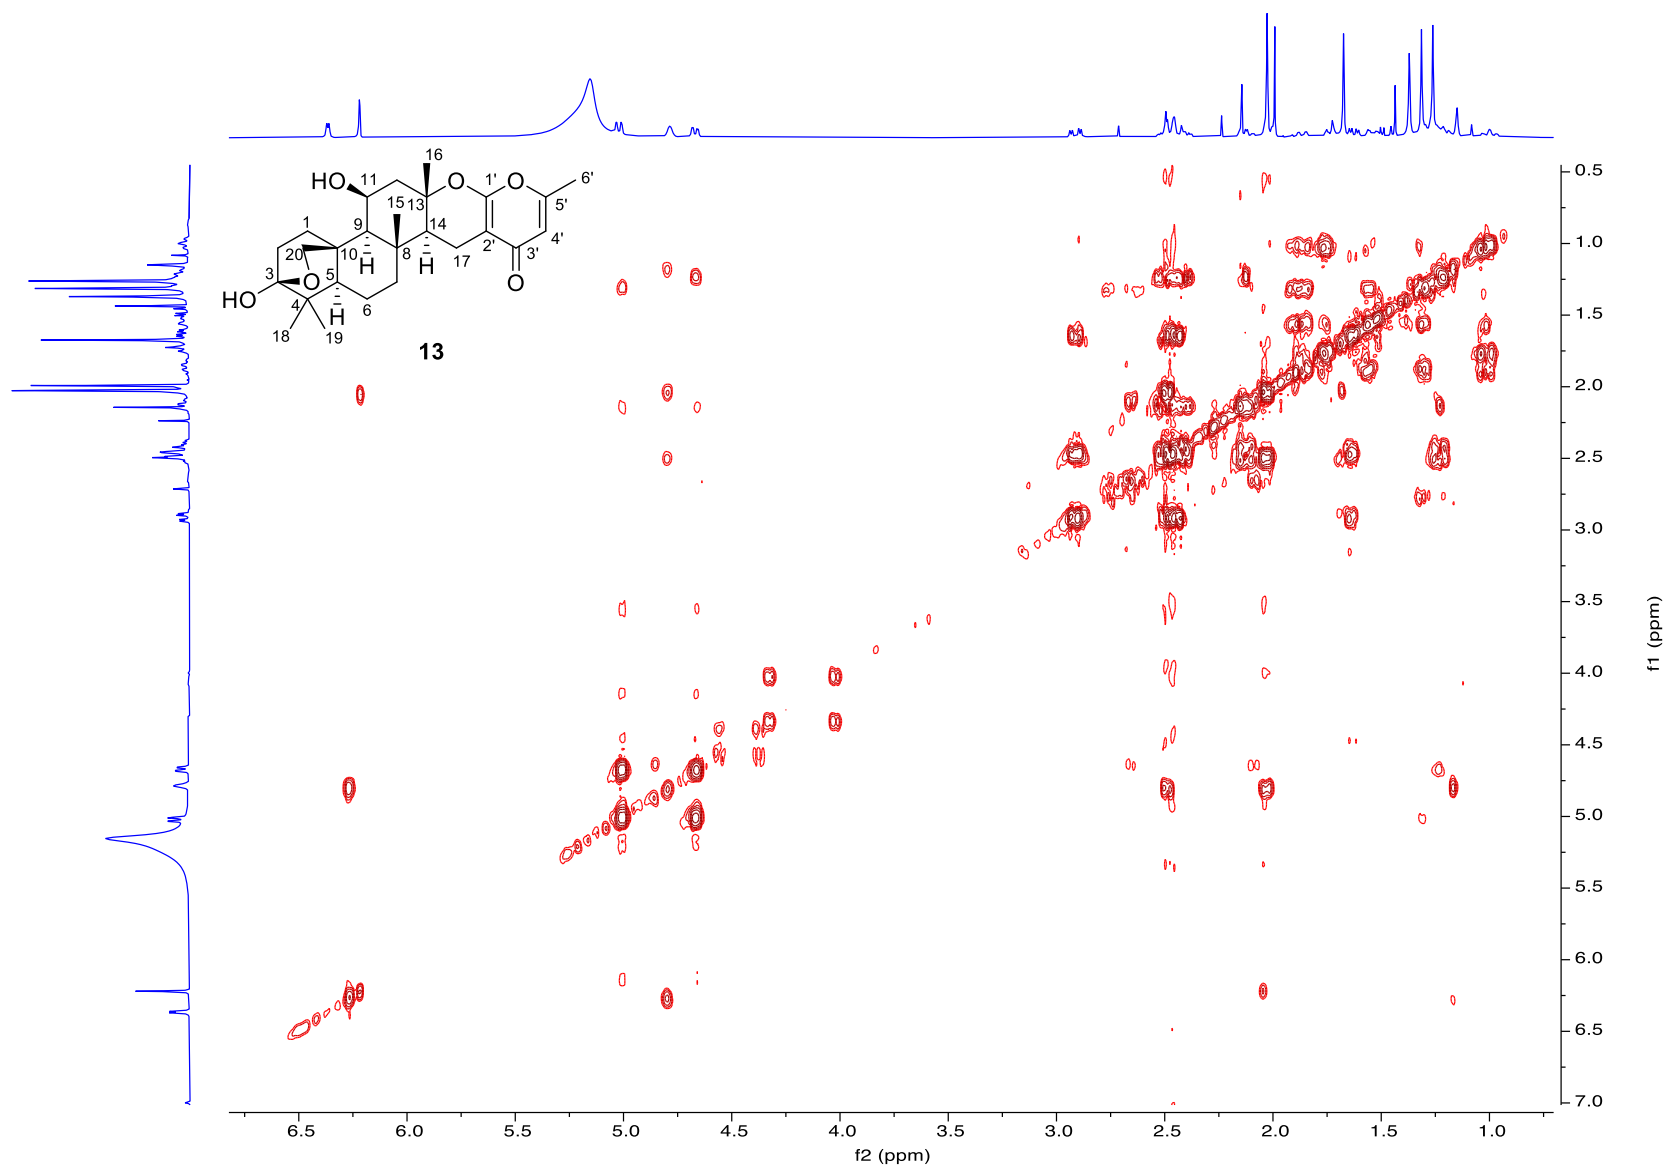

Figure S27.  $^1\text{H}$ - $^1\text{H}$  COSY spectrum of chevalone Q (**13**).

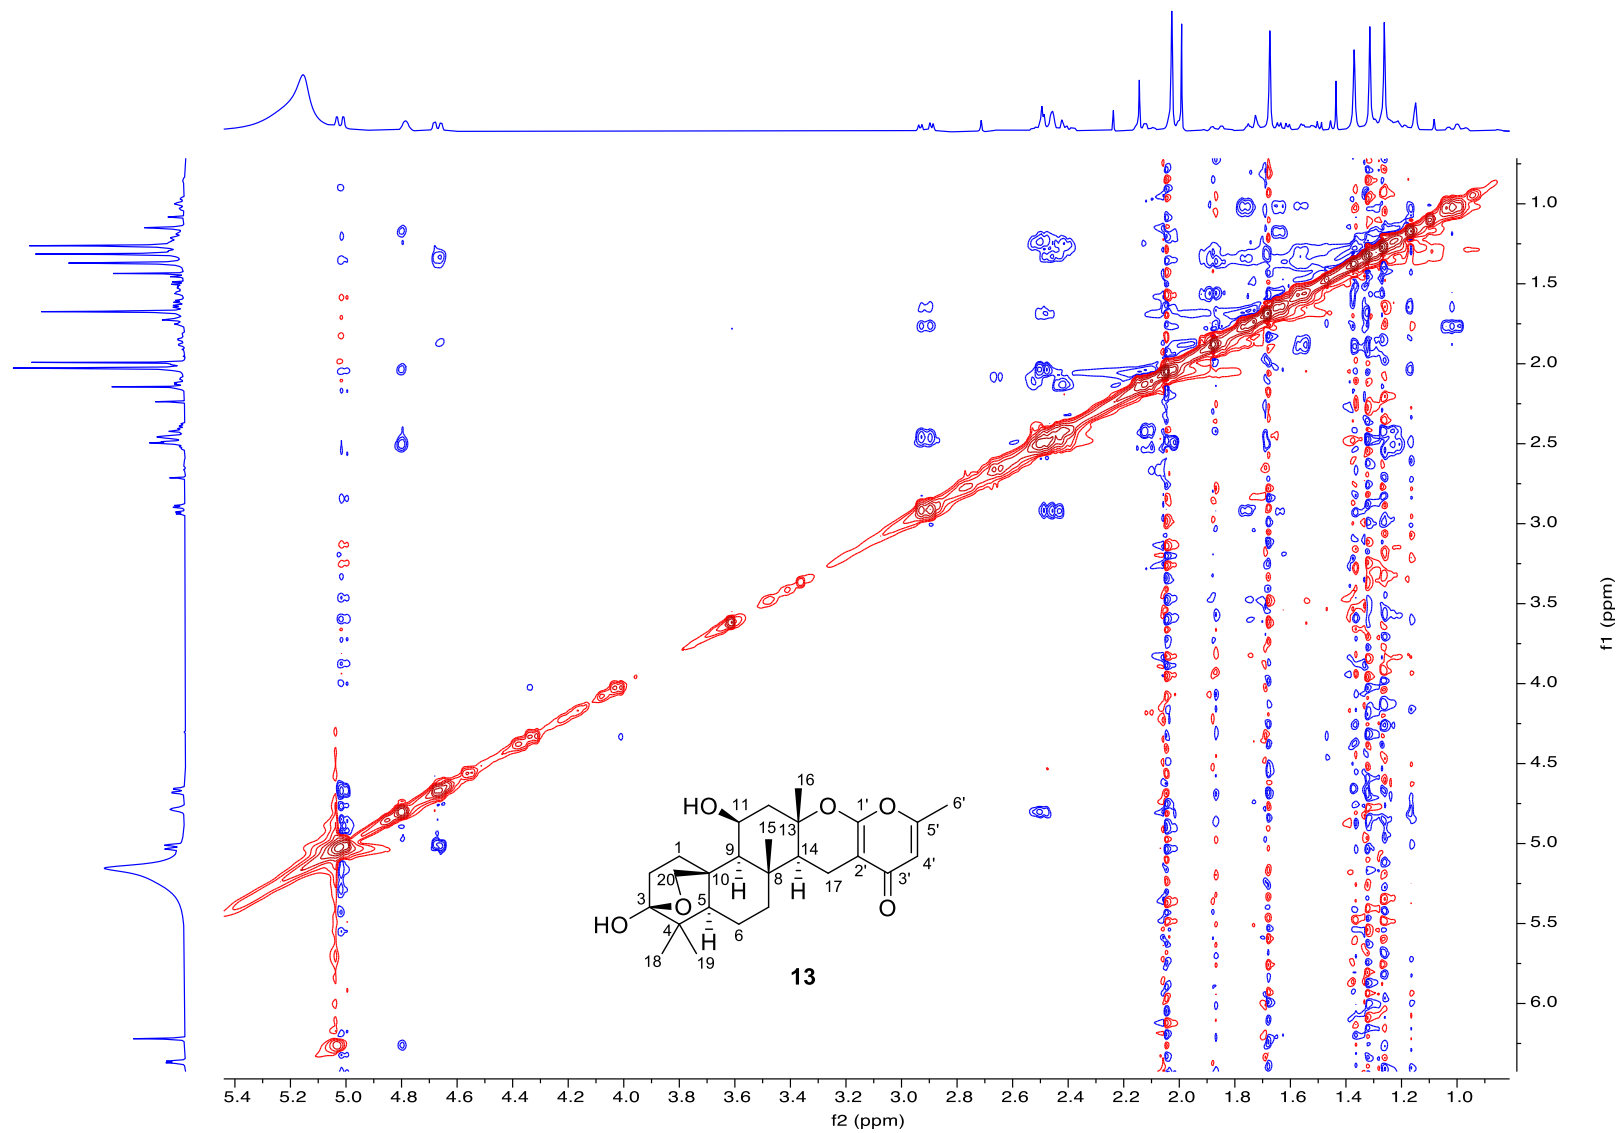

Figure S28. ROESY spectrum of chevalone Q (**13**).

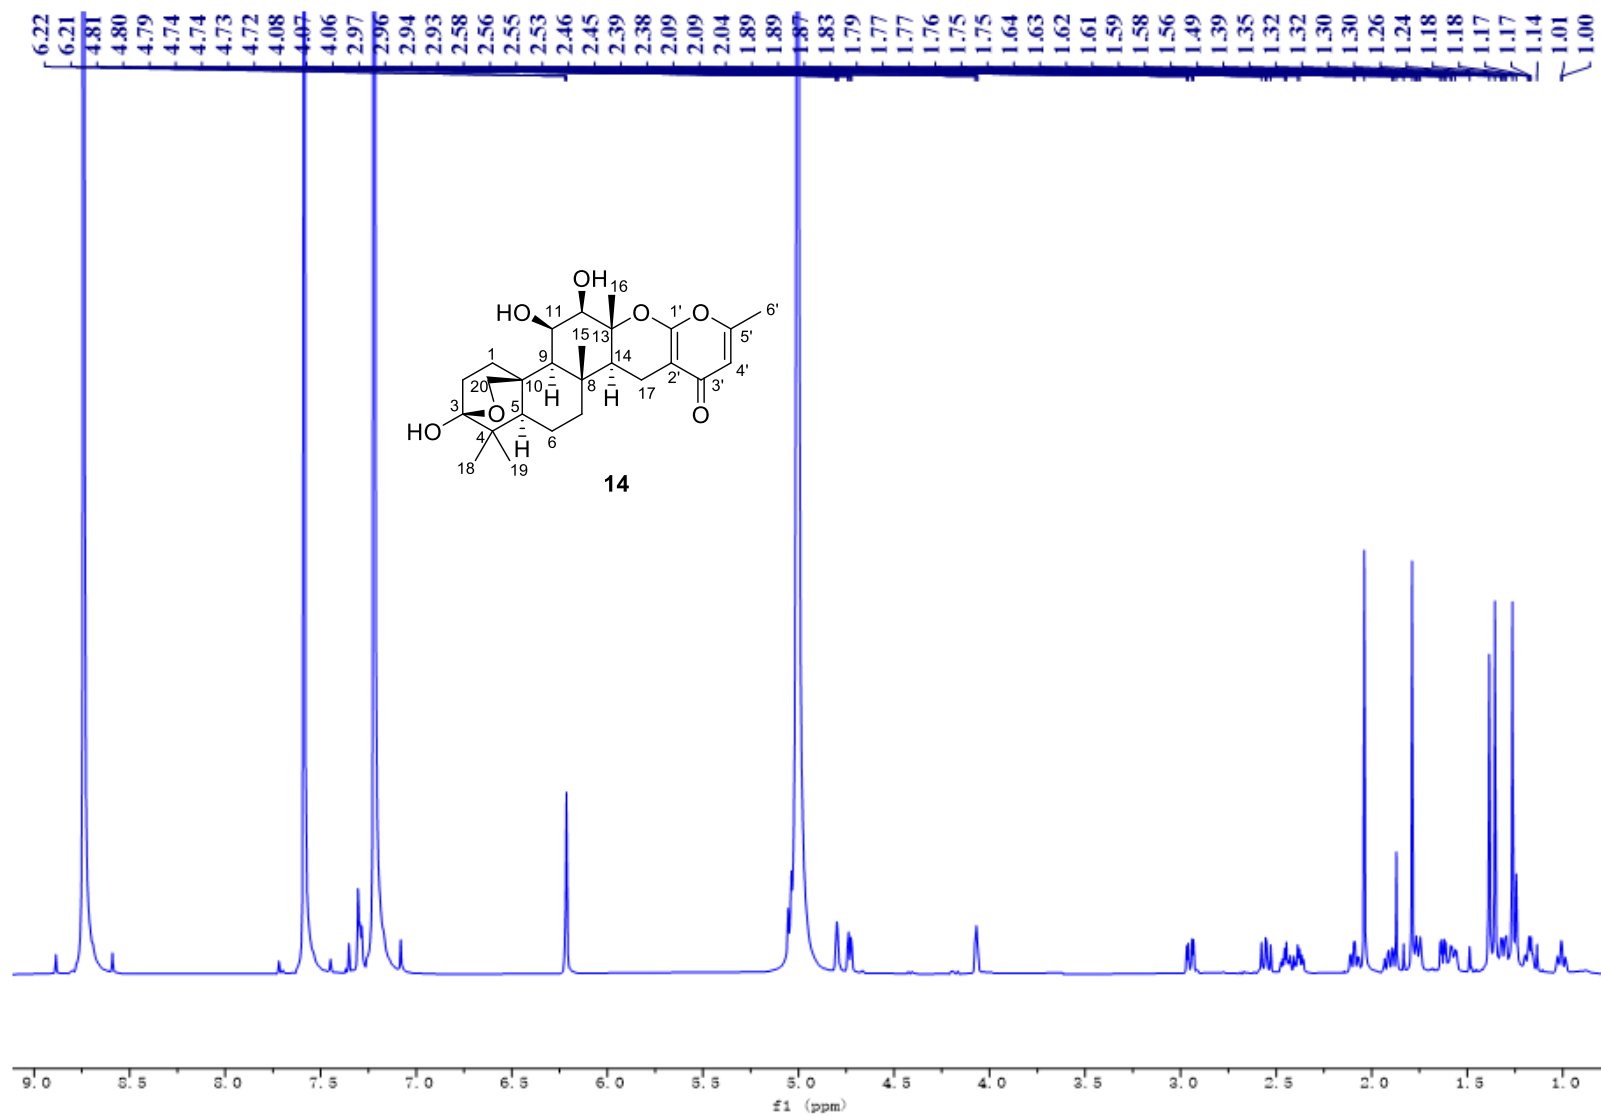

Figure S29. <sup>1</sup>H NMR spectrum of chevalone R (**14**).

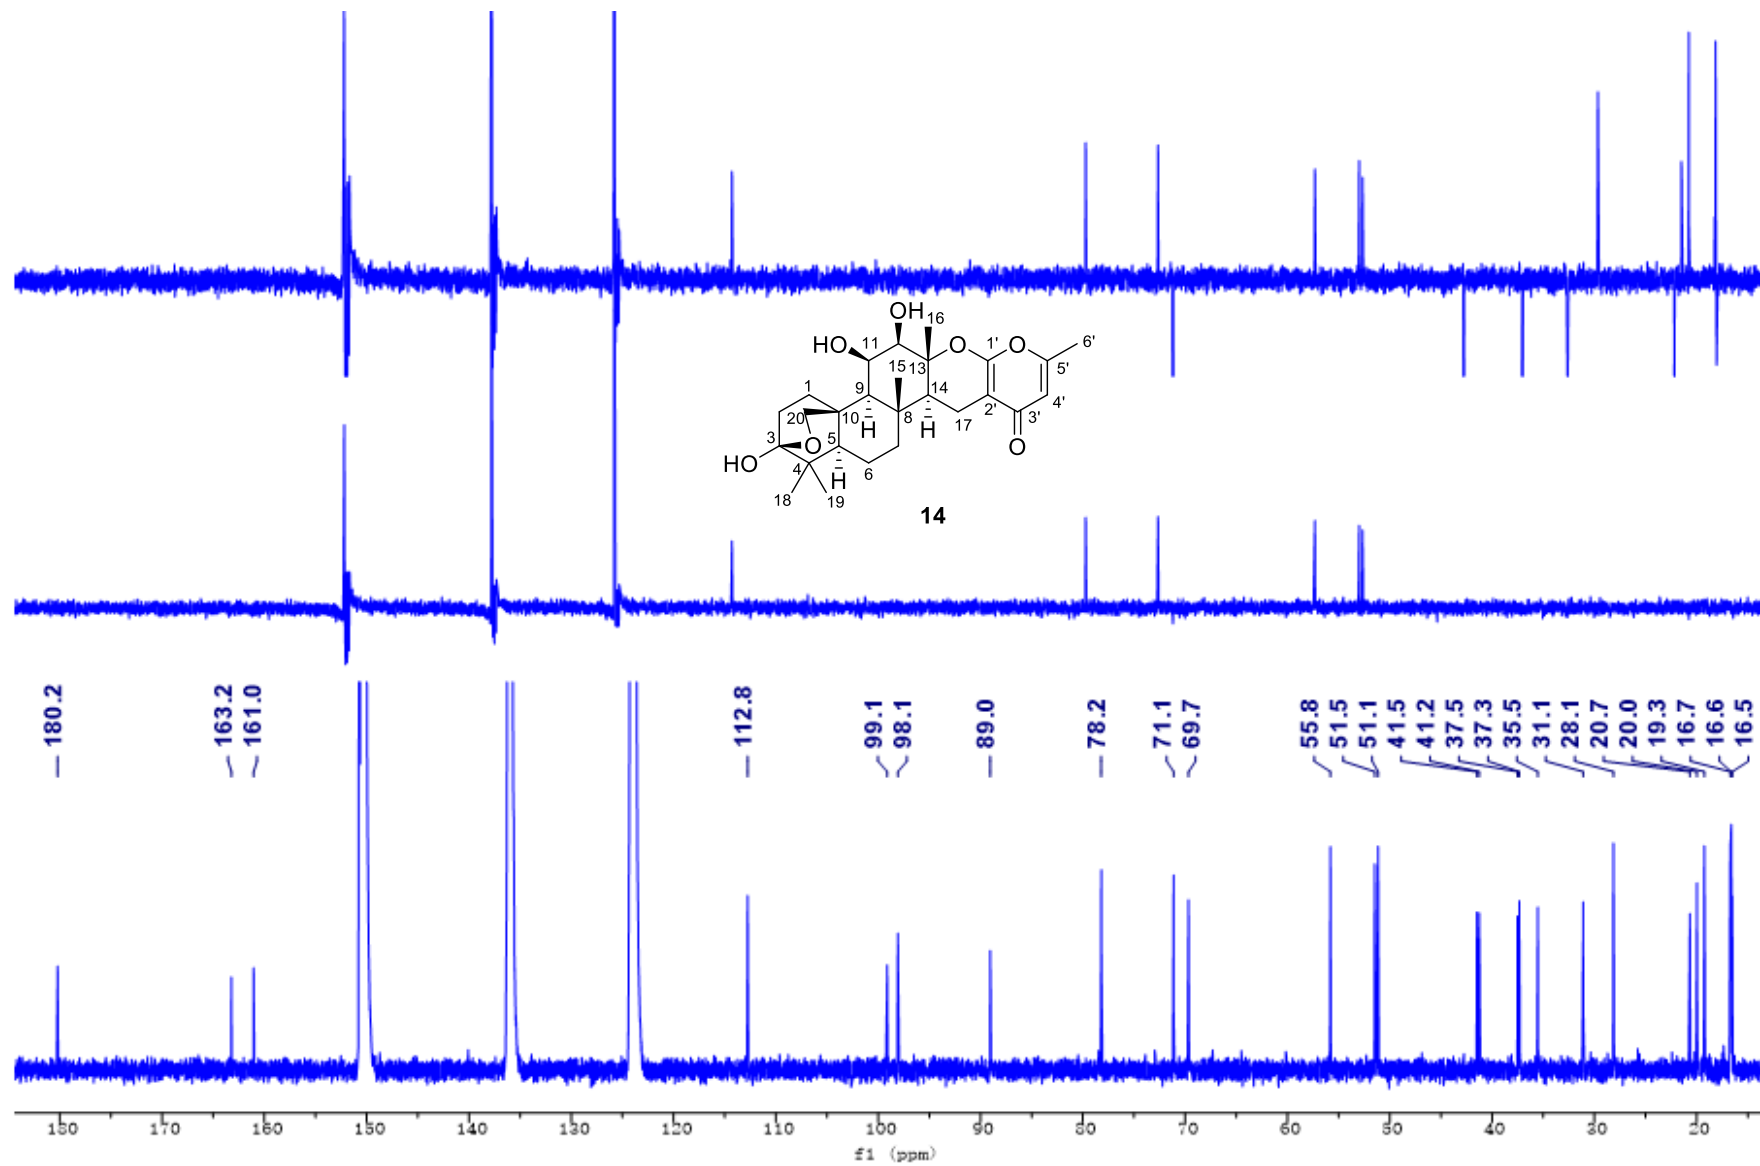

Figure S30. <sup>13</sup>C NMR spectrum of chevalone R (**14**).

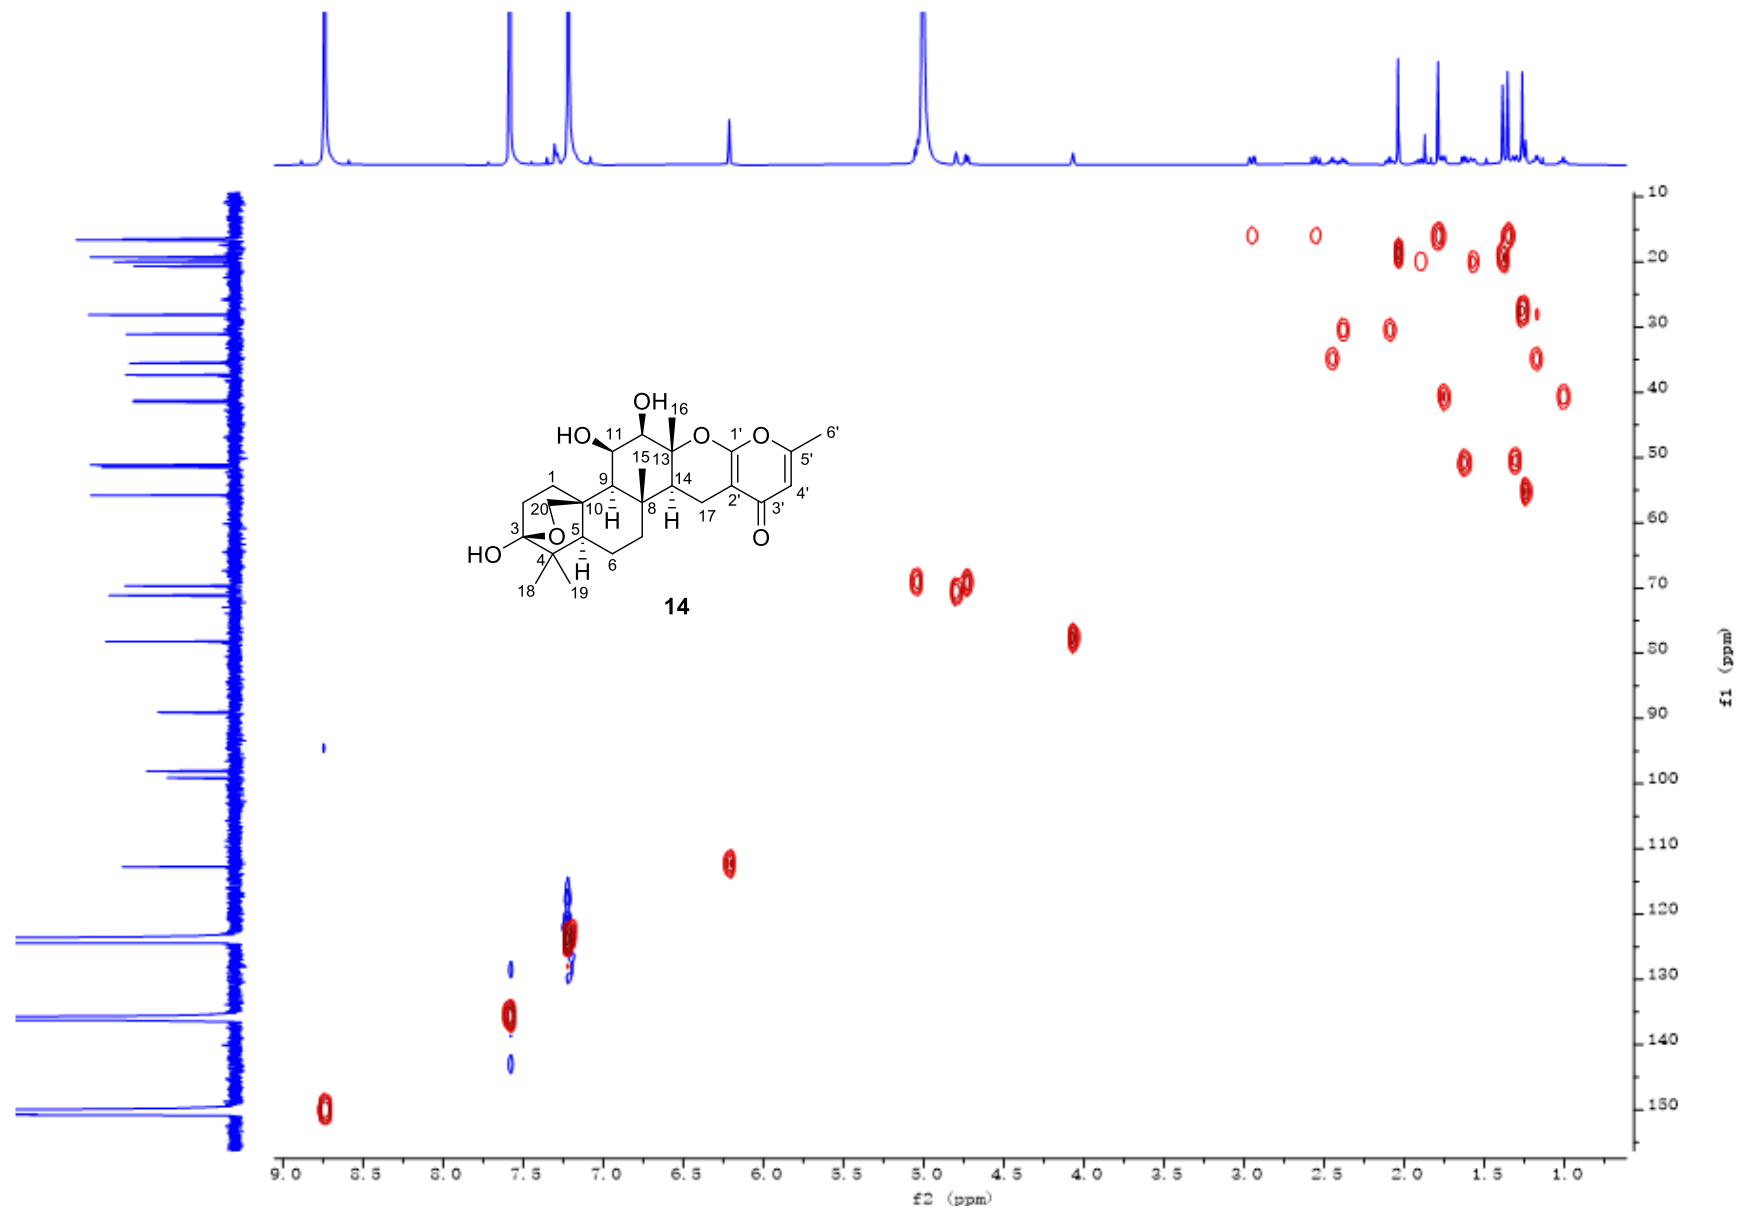

Figure S31. HSQC spectrum of chevalone R (**14**).

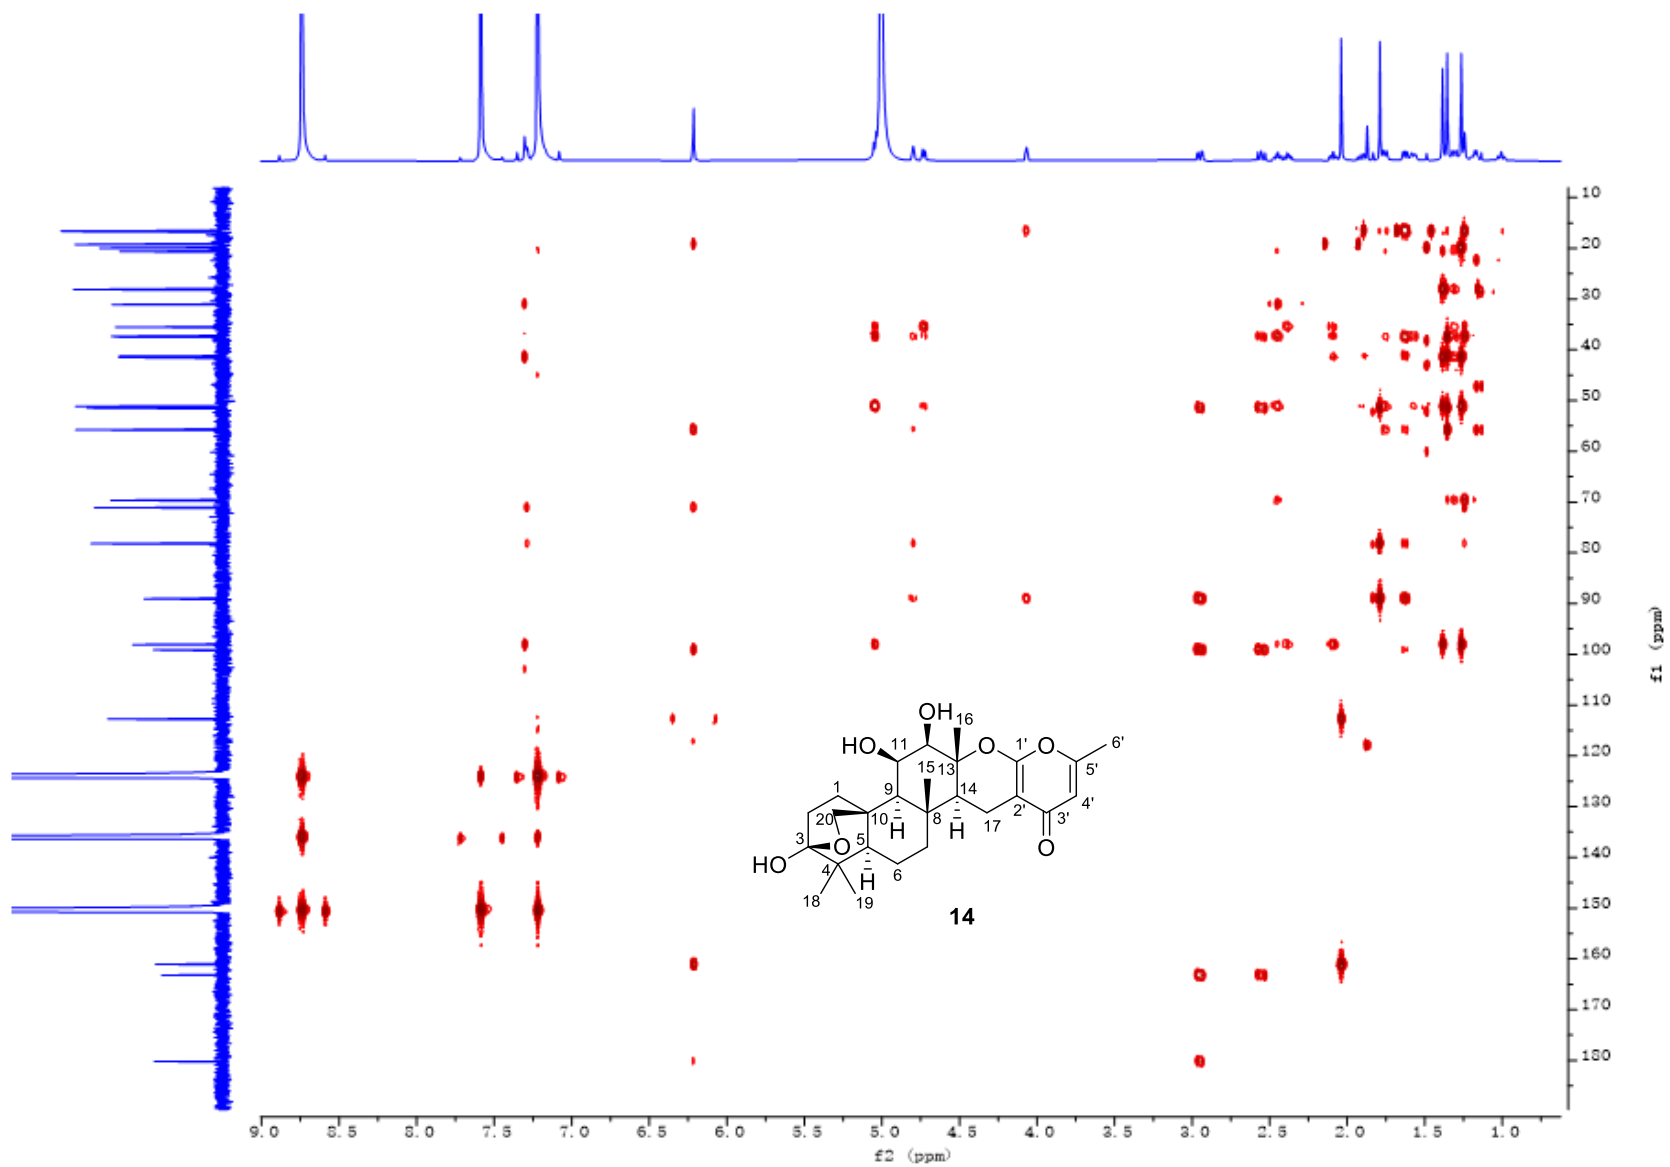

Figure S32. HMBC spectrum of chevalone R (**14**).

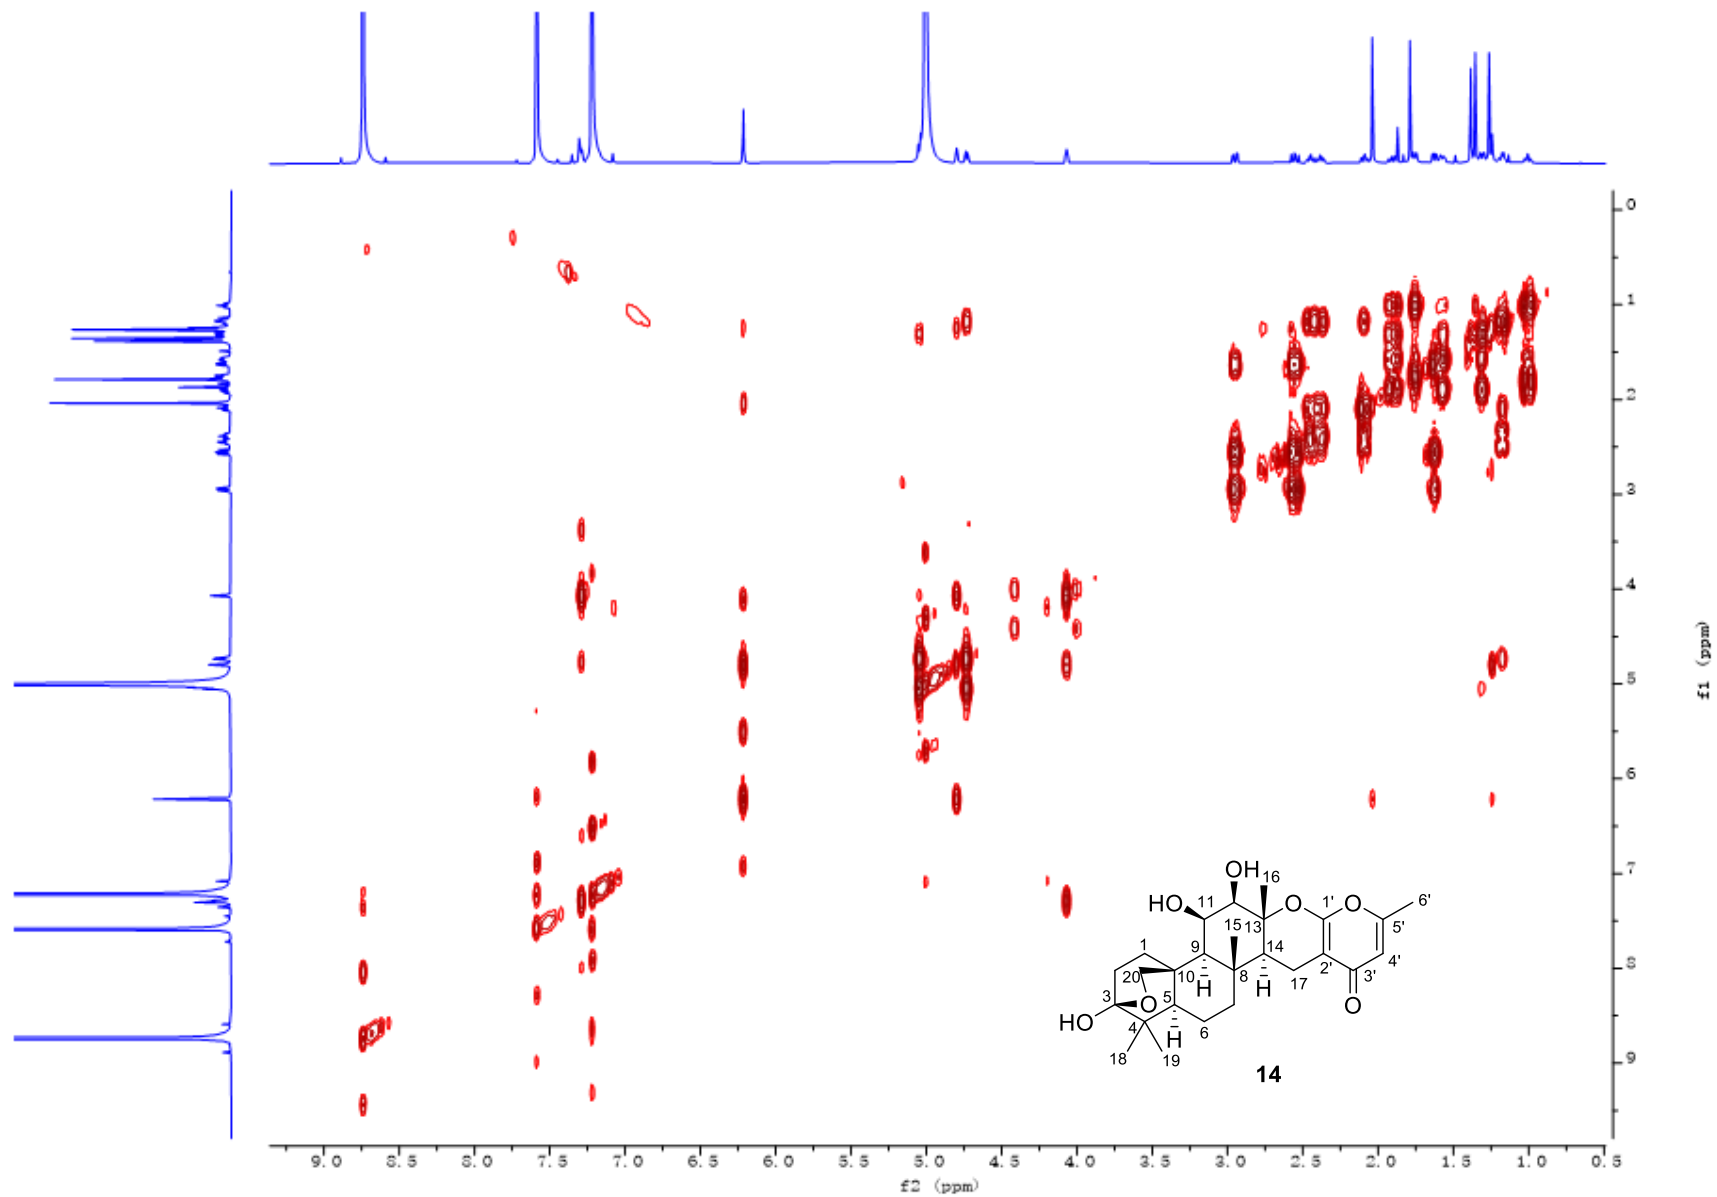

Figure S33.  $^1\text{H}$ - $^1\text{H}$  COSY spectrum of chevalone R (14).



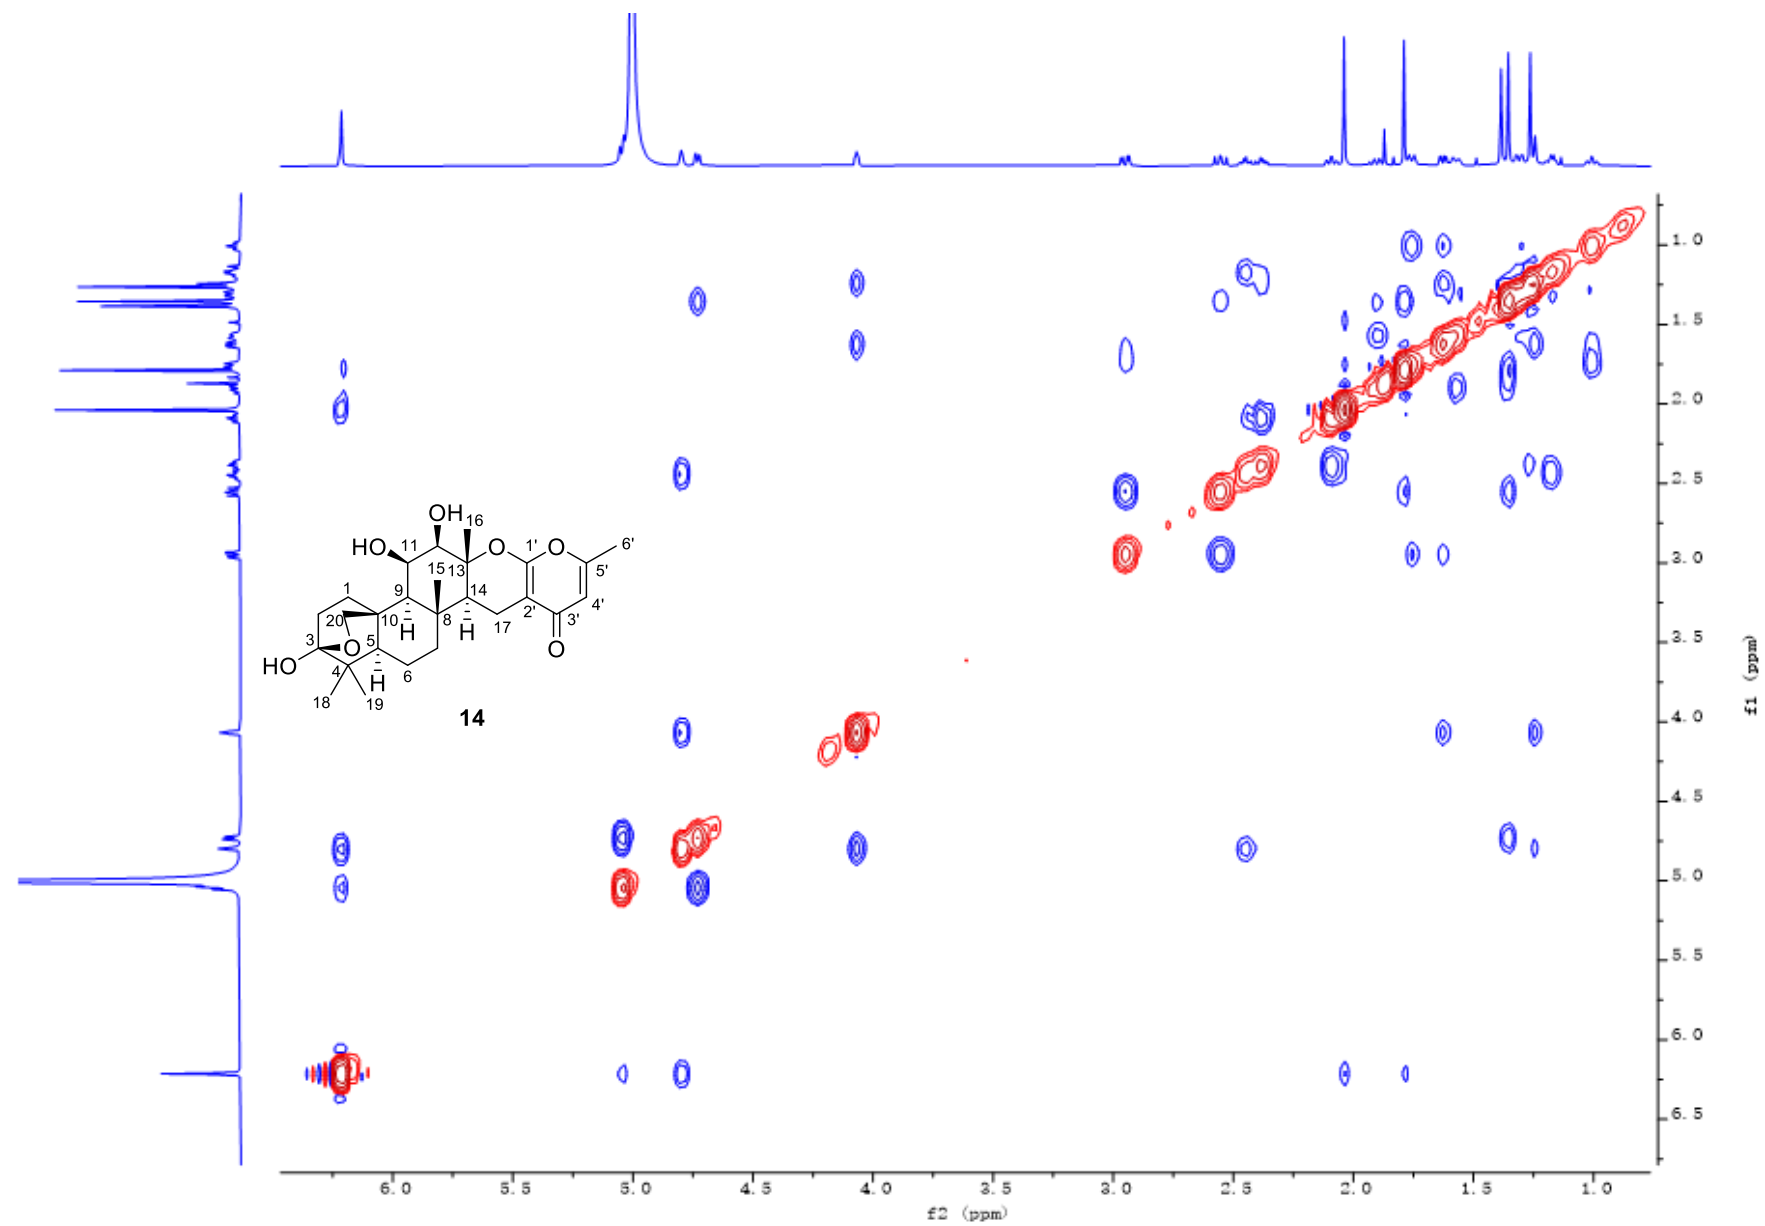

Figure S34. ROESY spectrum of chevalone R (**14**).

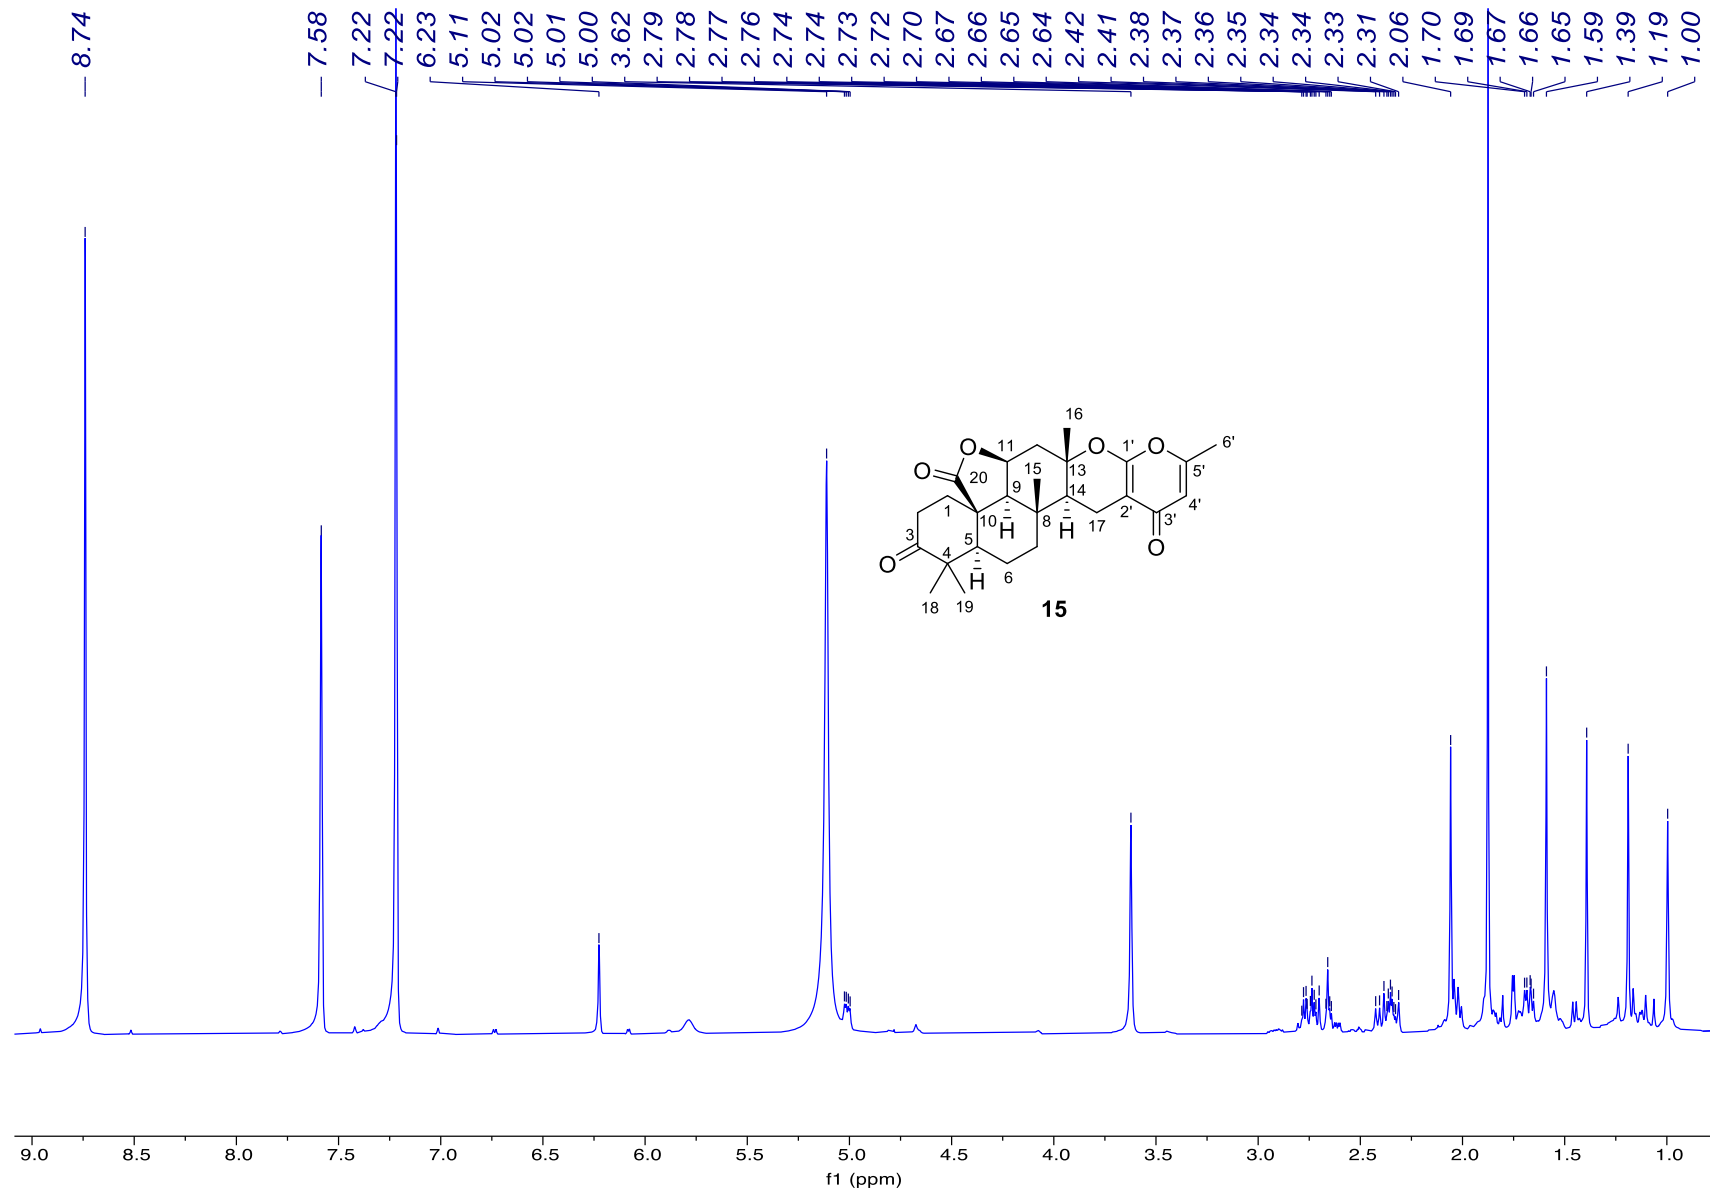

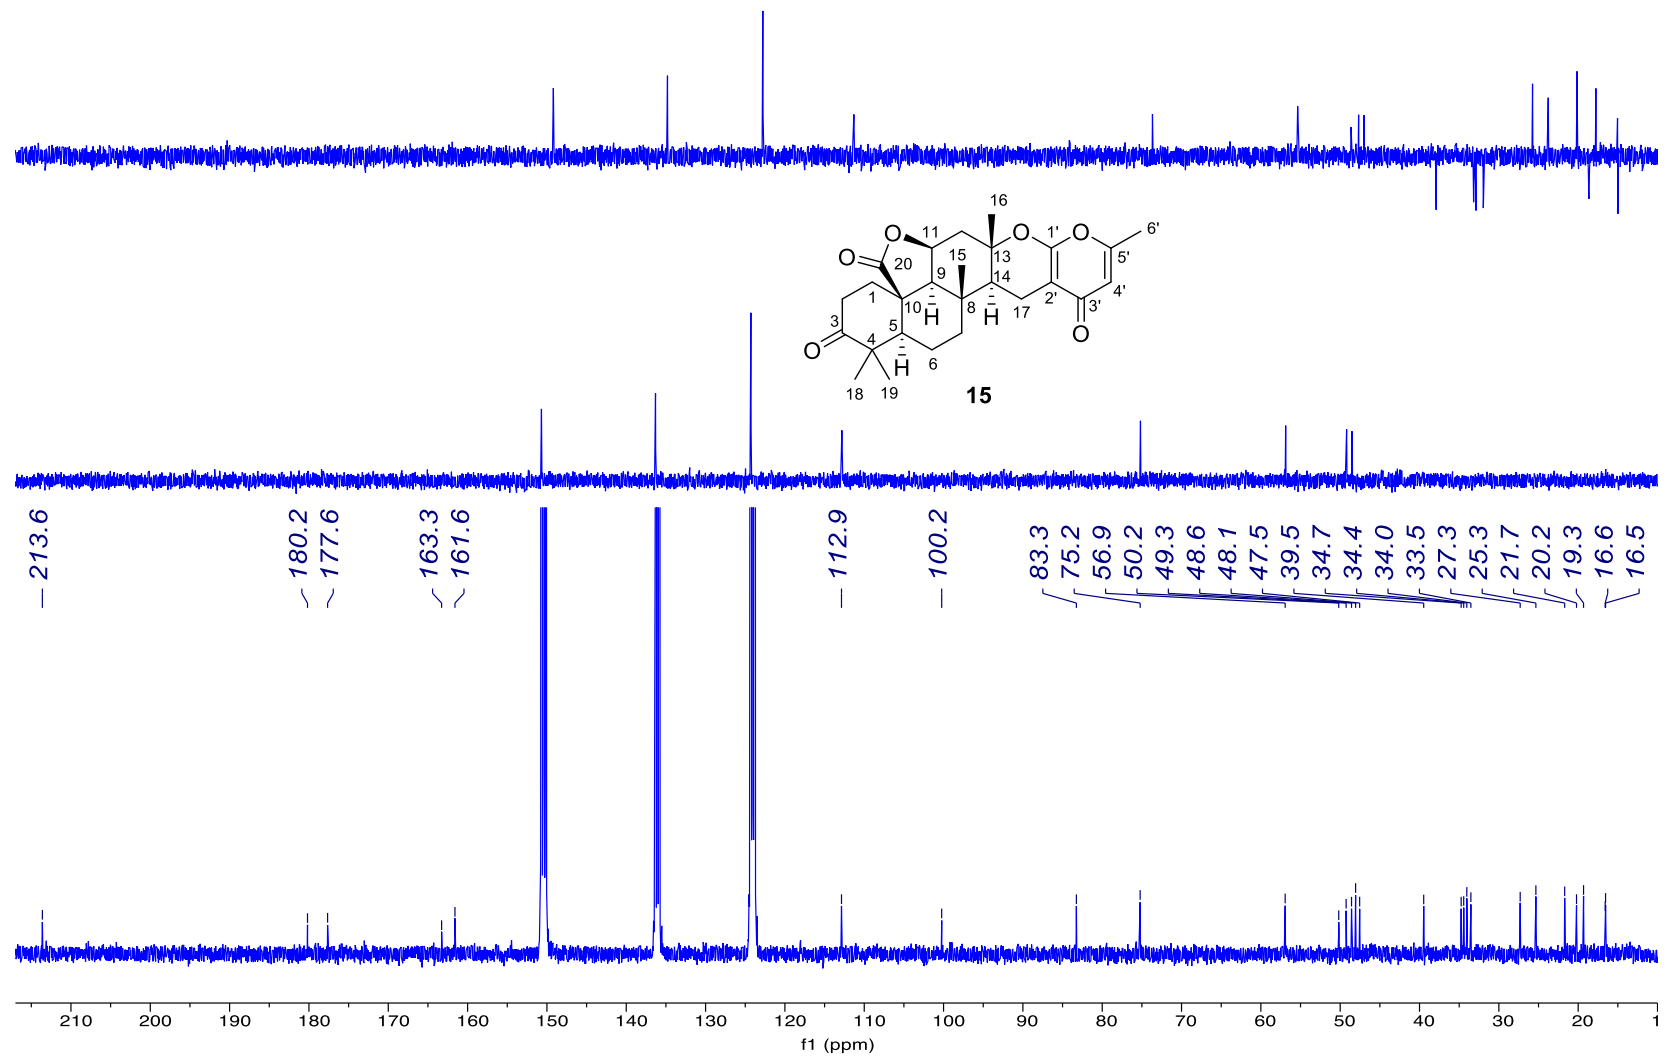

Figure S36. <sup>13</sup>C NMR spectrum of chevalone S (15).

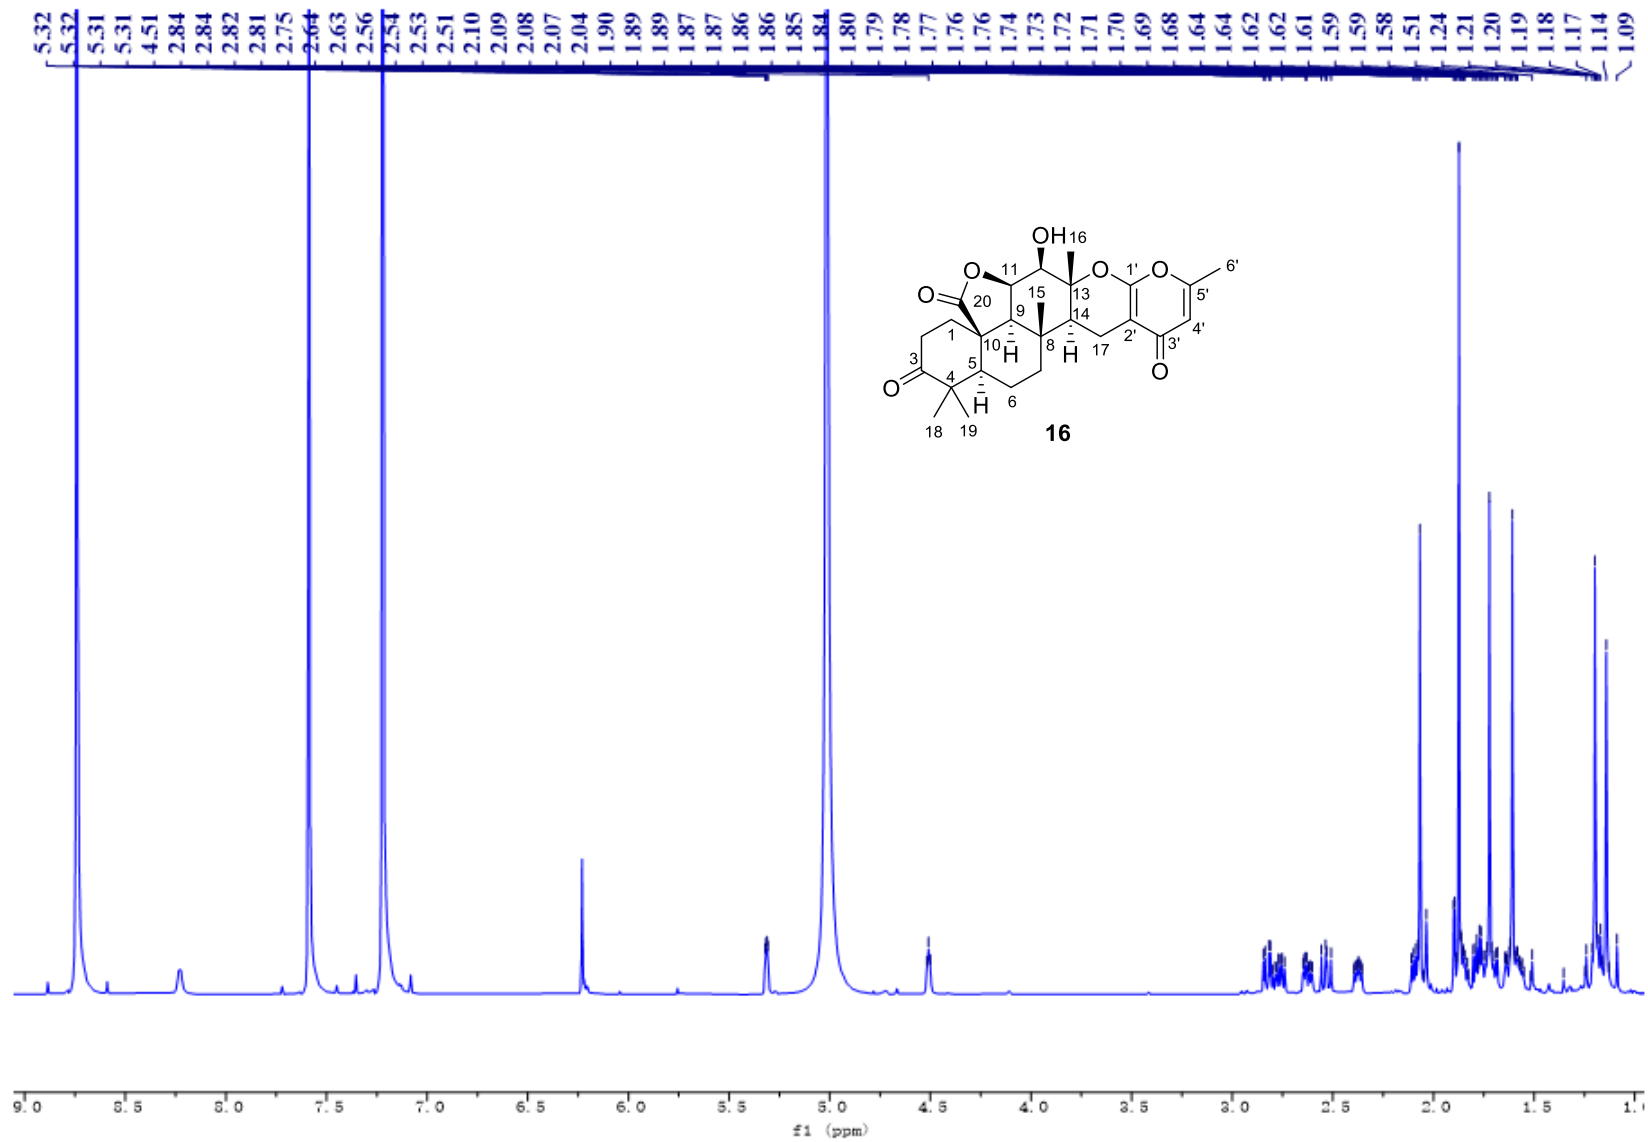

Figure S37. <sup>1</sup>H NMR spectrum of chevalone T (16).

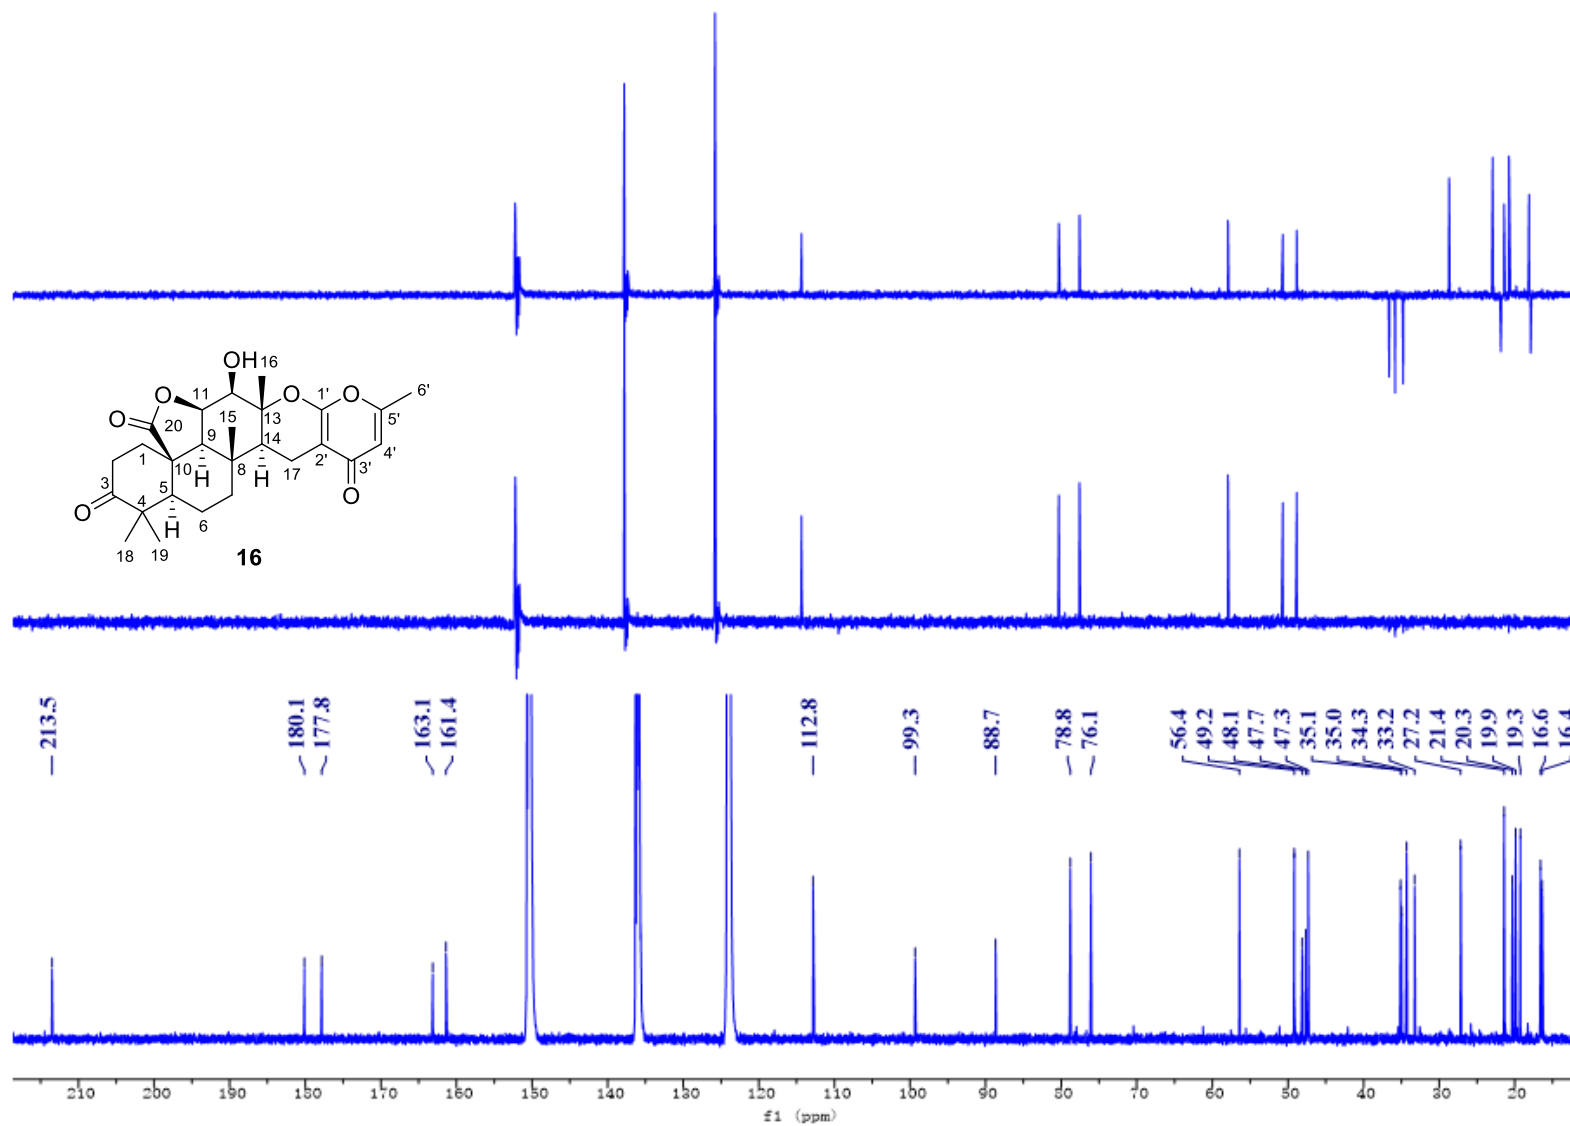

Figure S38. <sup>13</sup>C NMR spectrum of chevalone T (**16**).

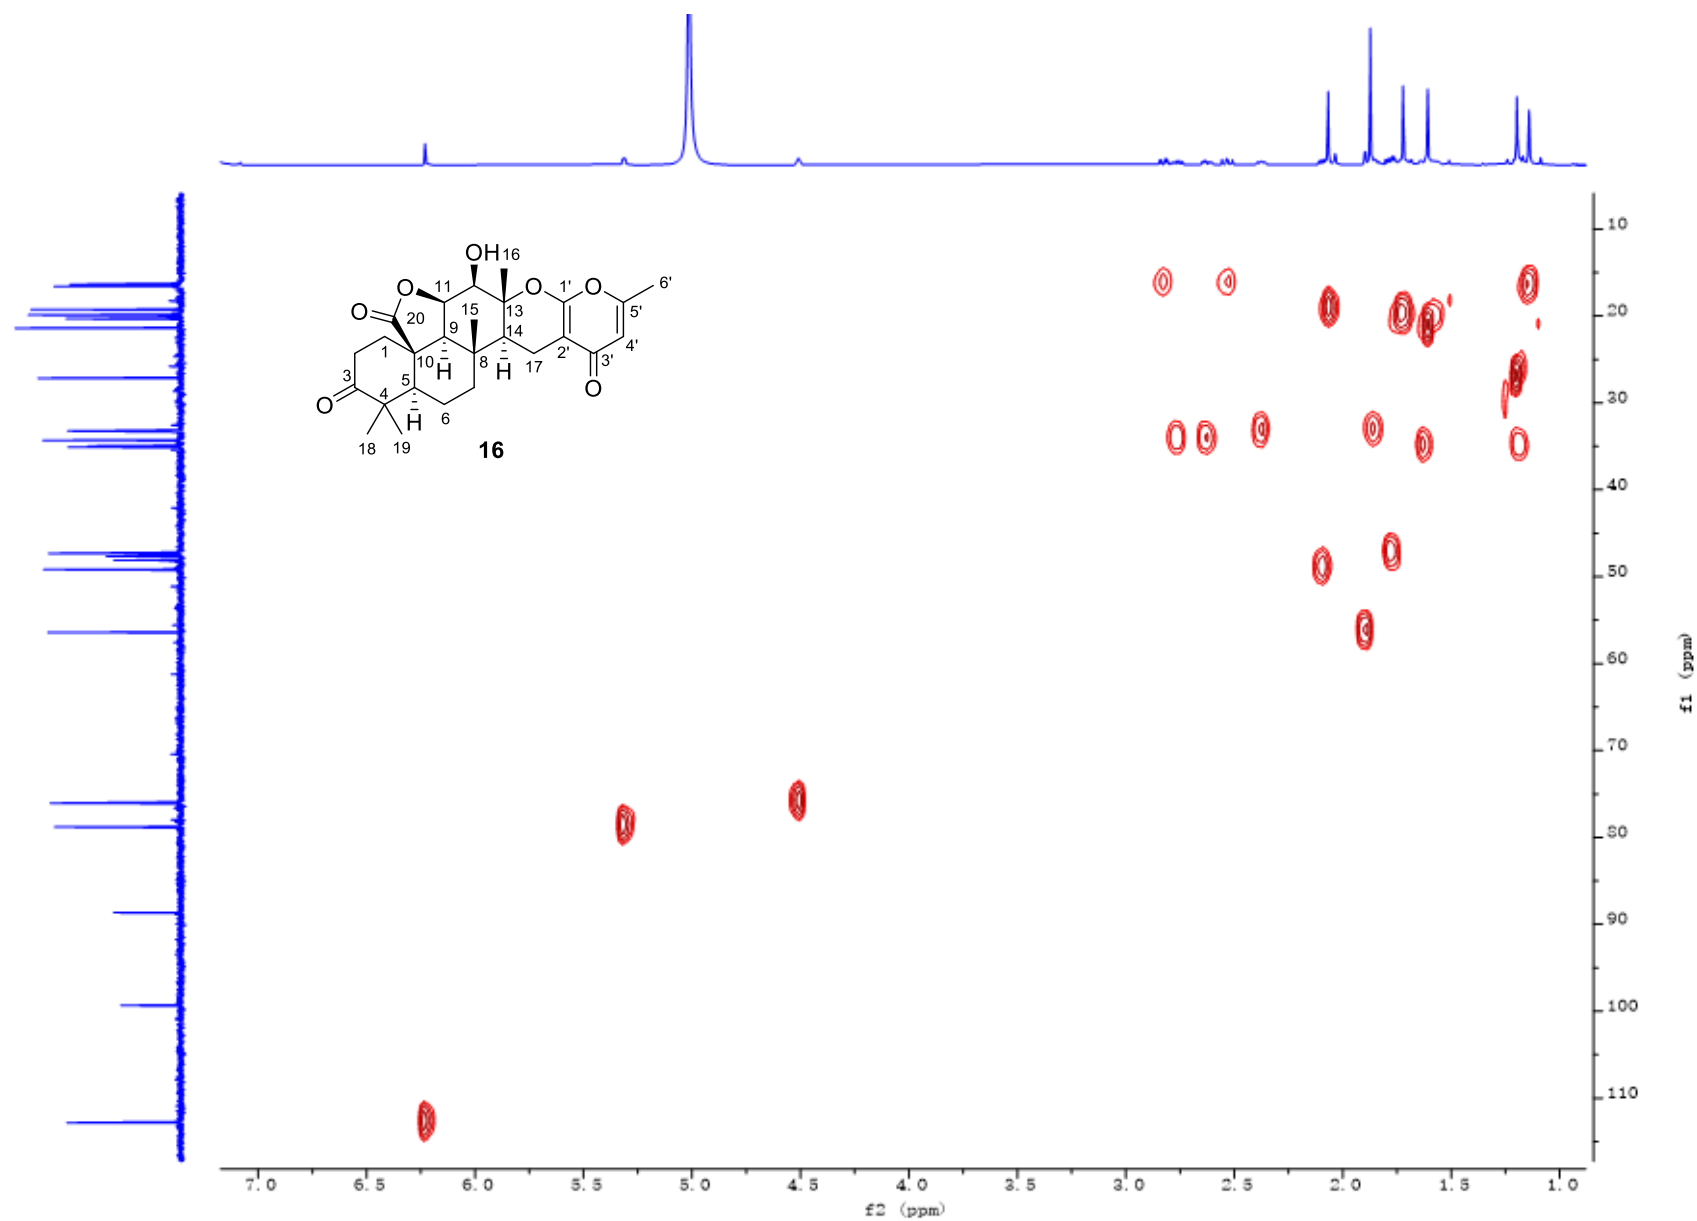

Figure S39. HSQC spectrum of chevalone T (**16**).

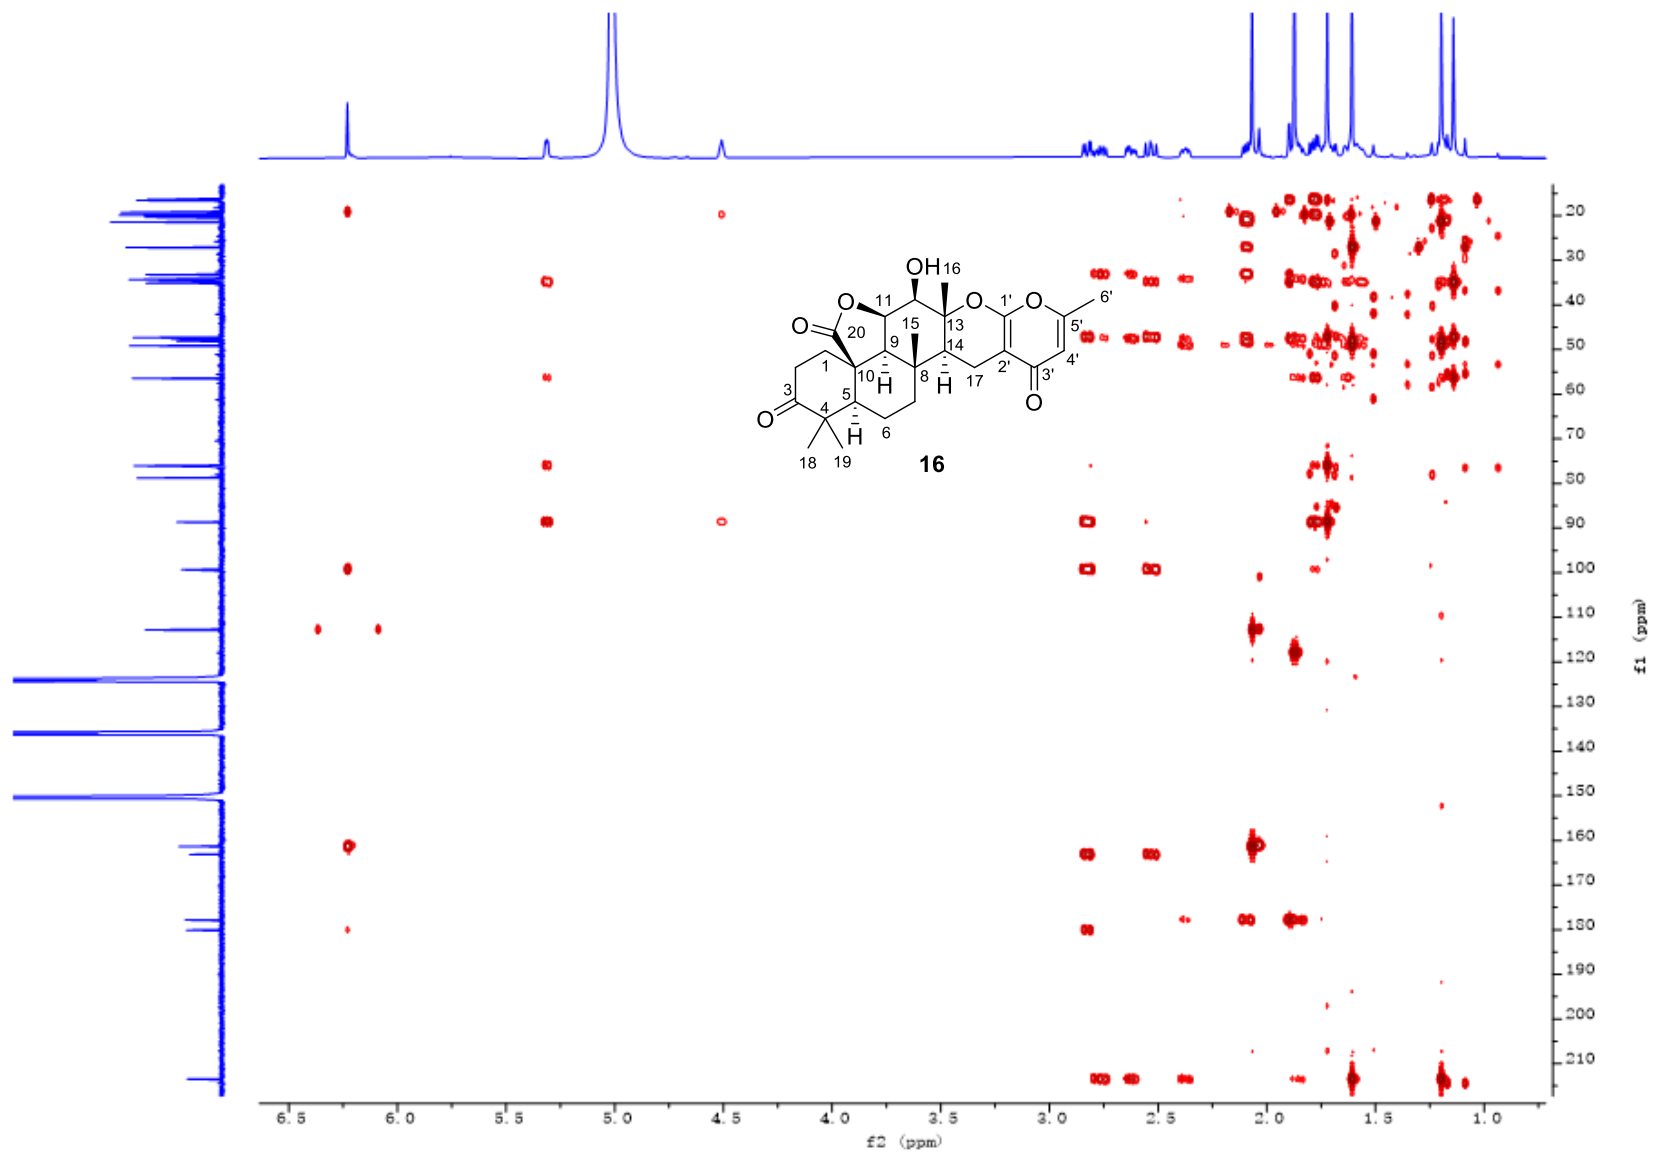

Figure S40. HMBC spectrum of chevalone T (**16**).

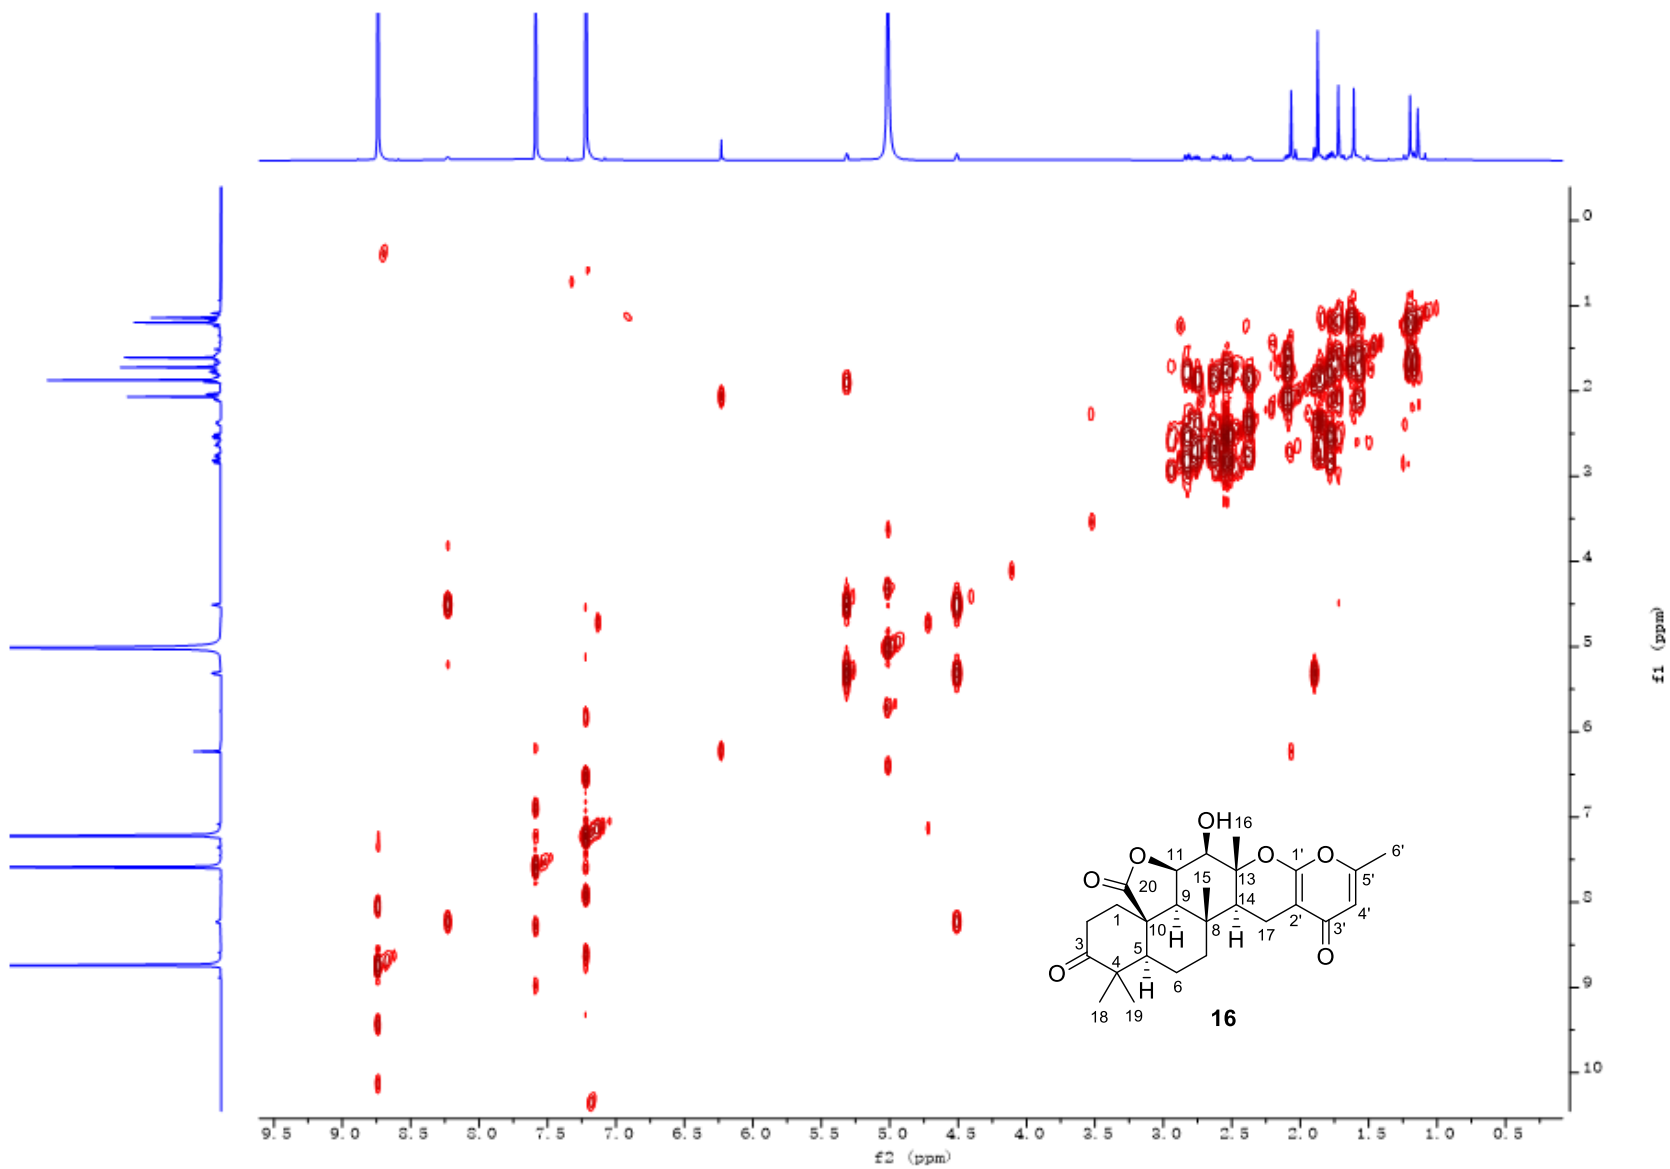

Figure S41.  $^1\text{H}$ - $^1\text{H}$  COSY spectrum of chevalone T (**16**).



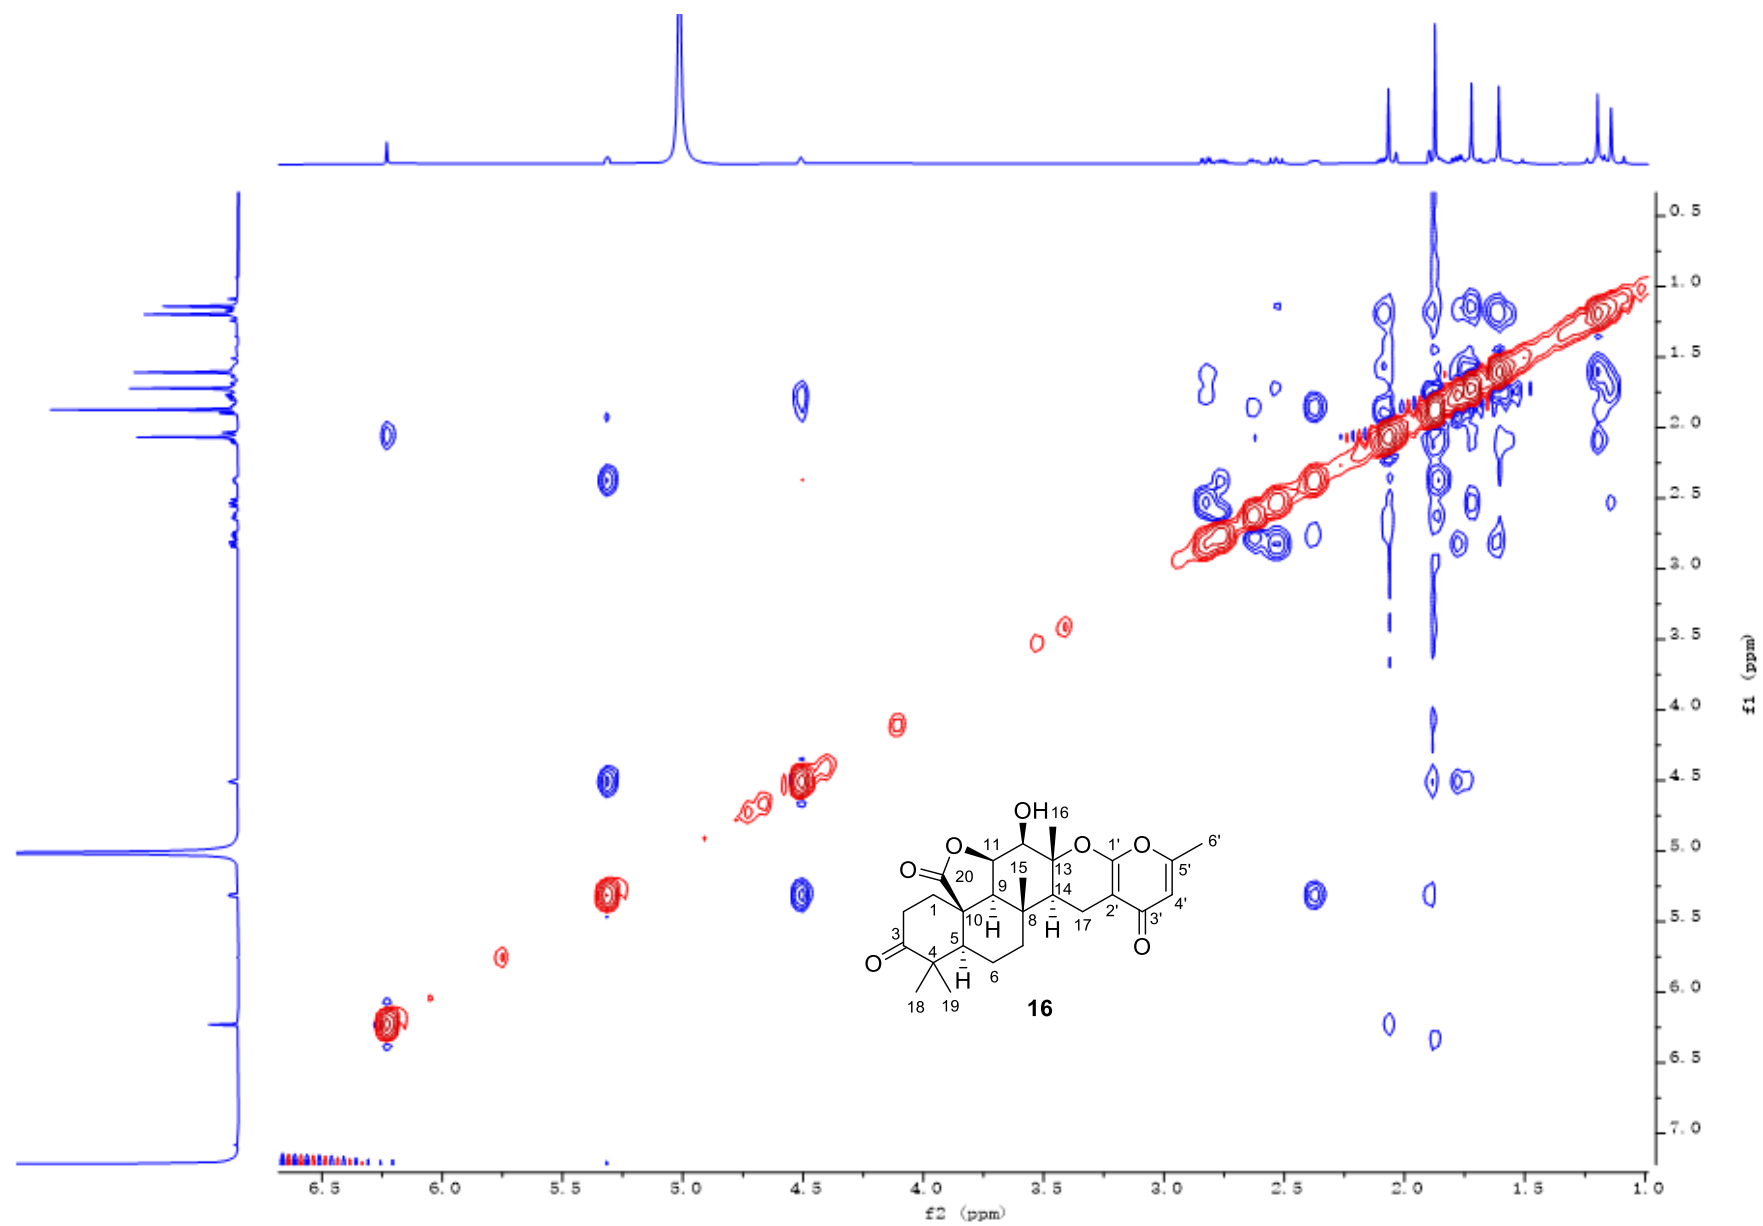

Figure S42. ROESY spectrum of chevalone T (**16**).

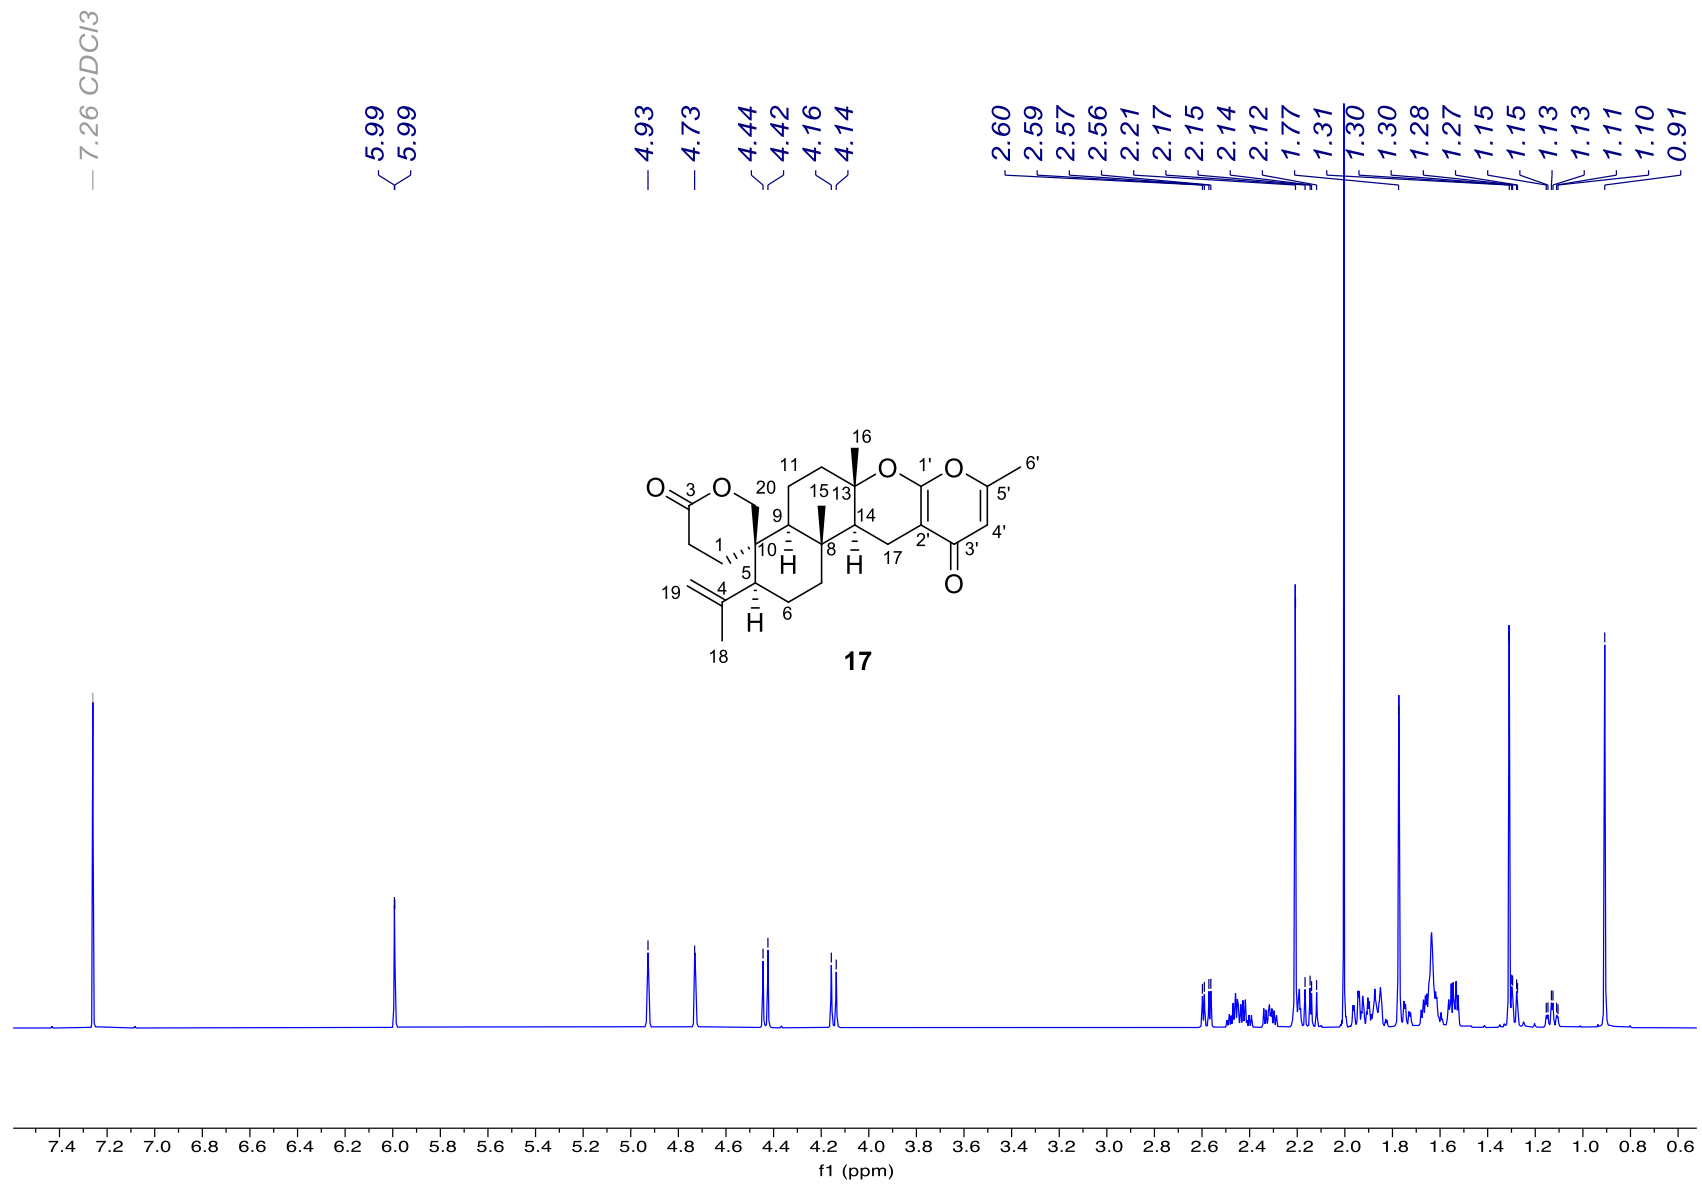

Figure S43. <sup>1</sup>H NMR spectrum of **17**.

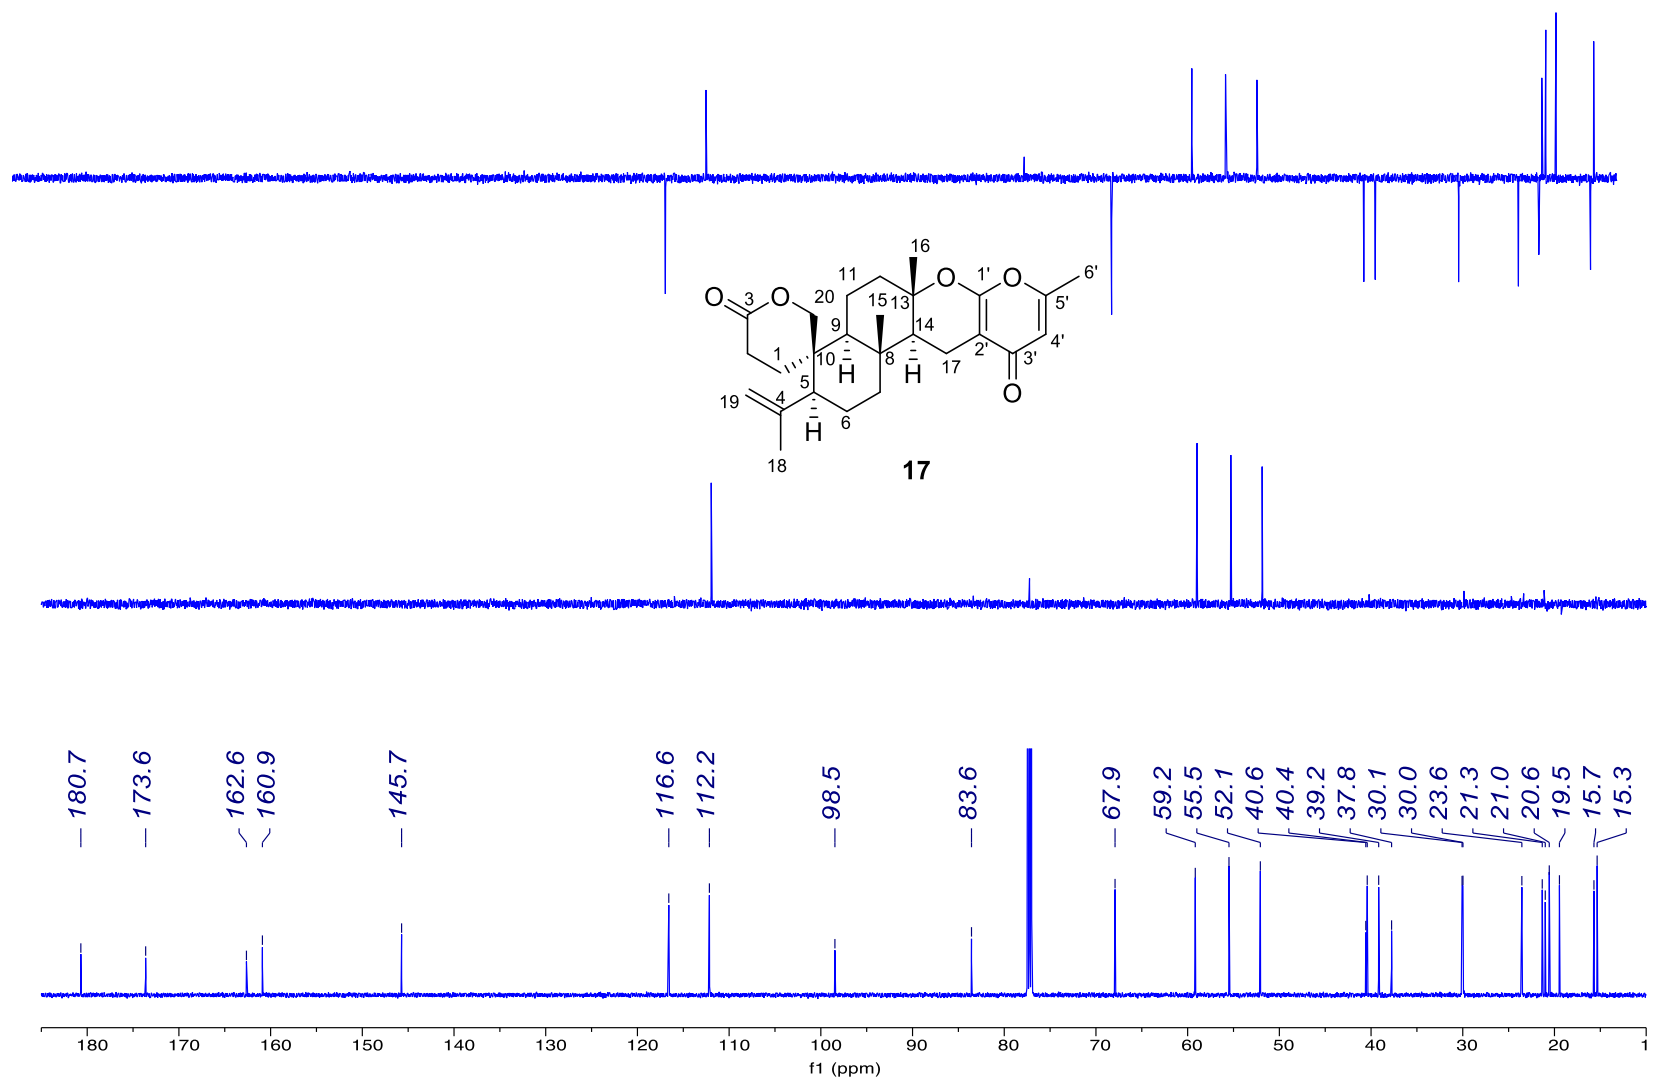

Figure S44.  $^{13}\text{C}$  NMR spectrum of **17**.

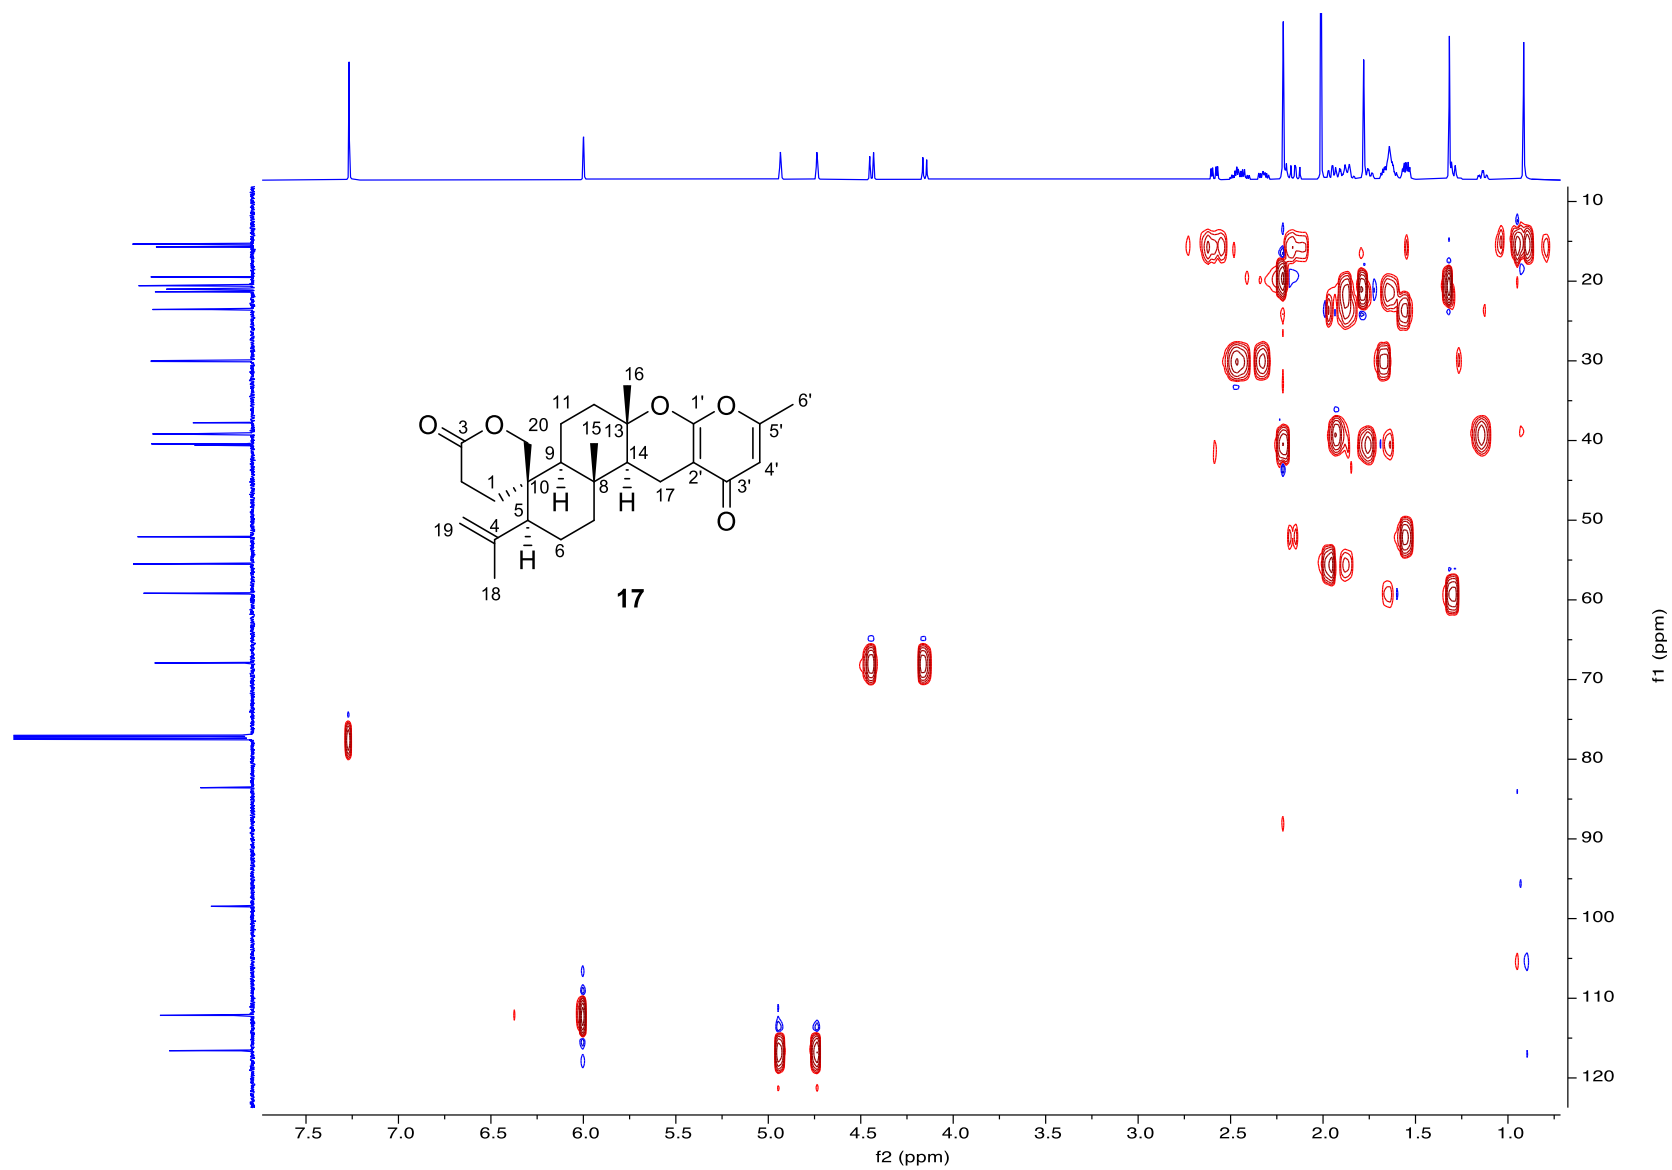

Figure S45. HSQC spectrum of **17**.

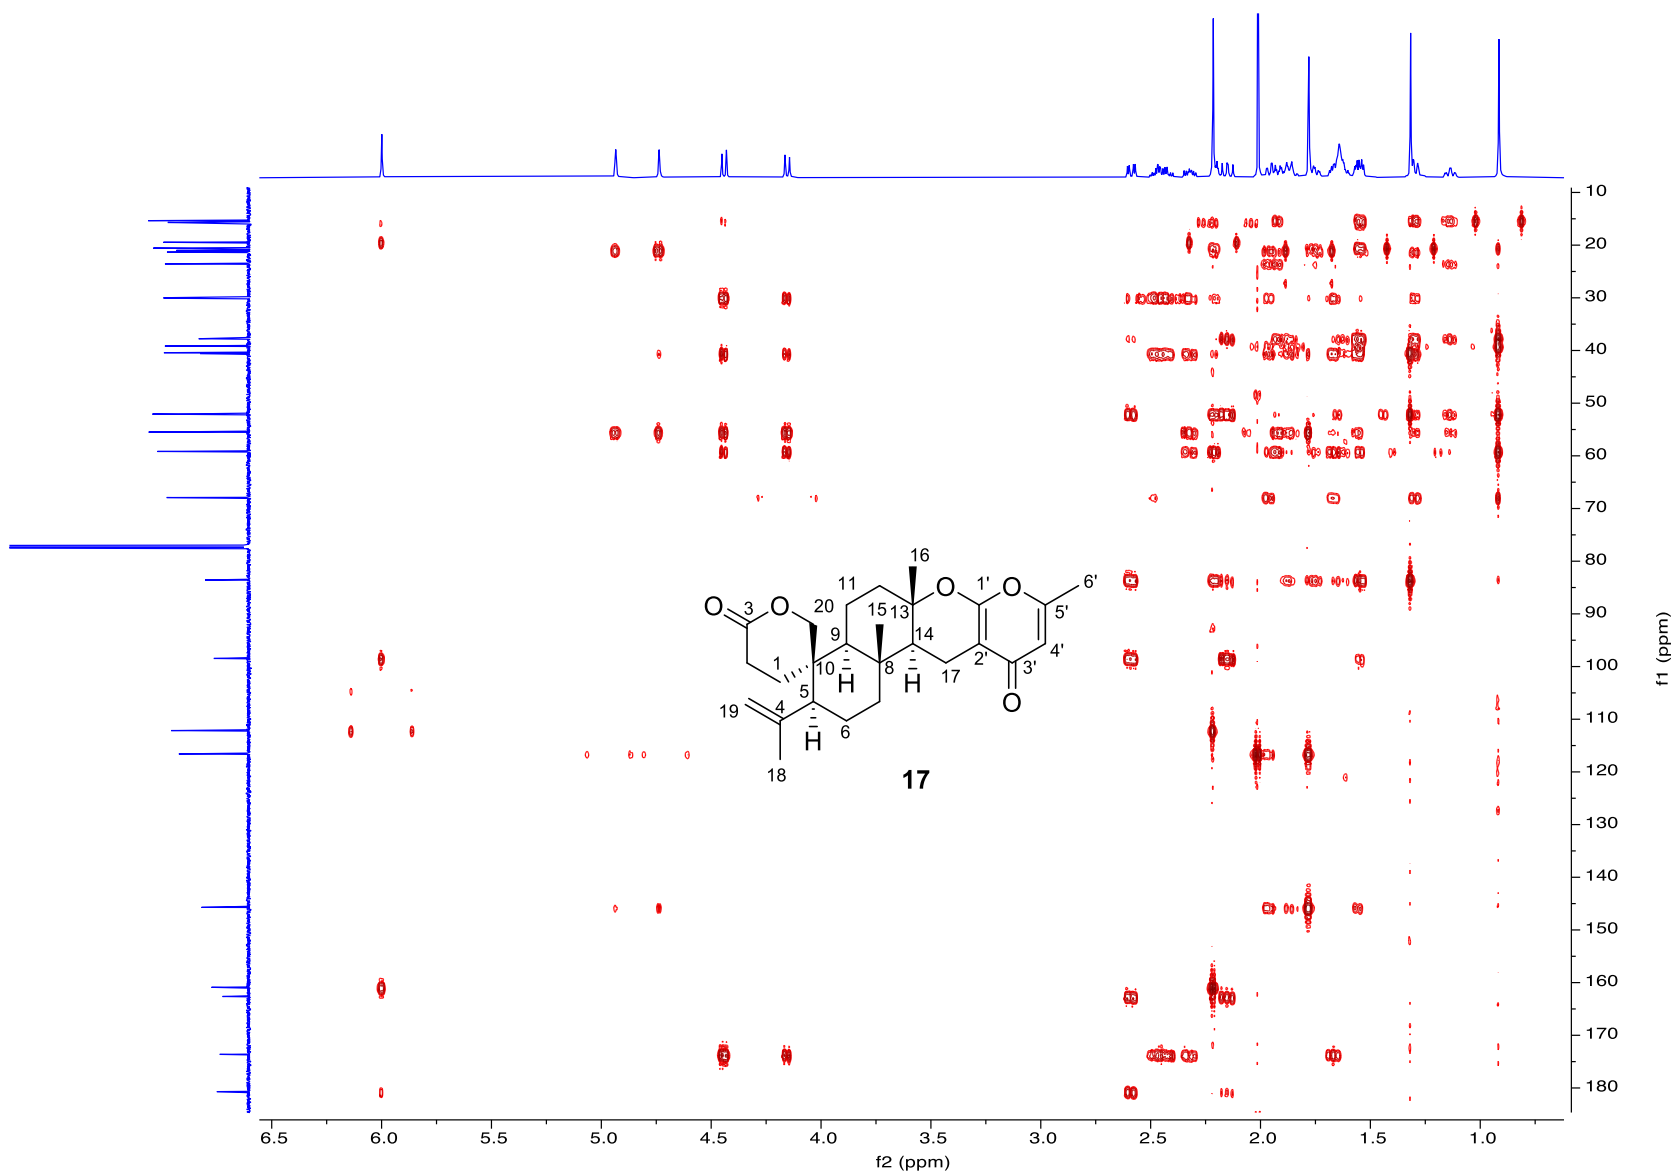

Figure S46. HMBC spectrum of **17**.

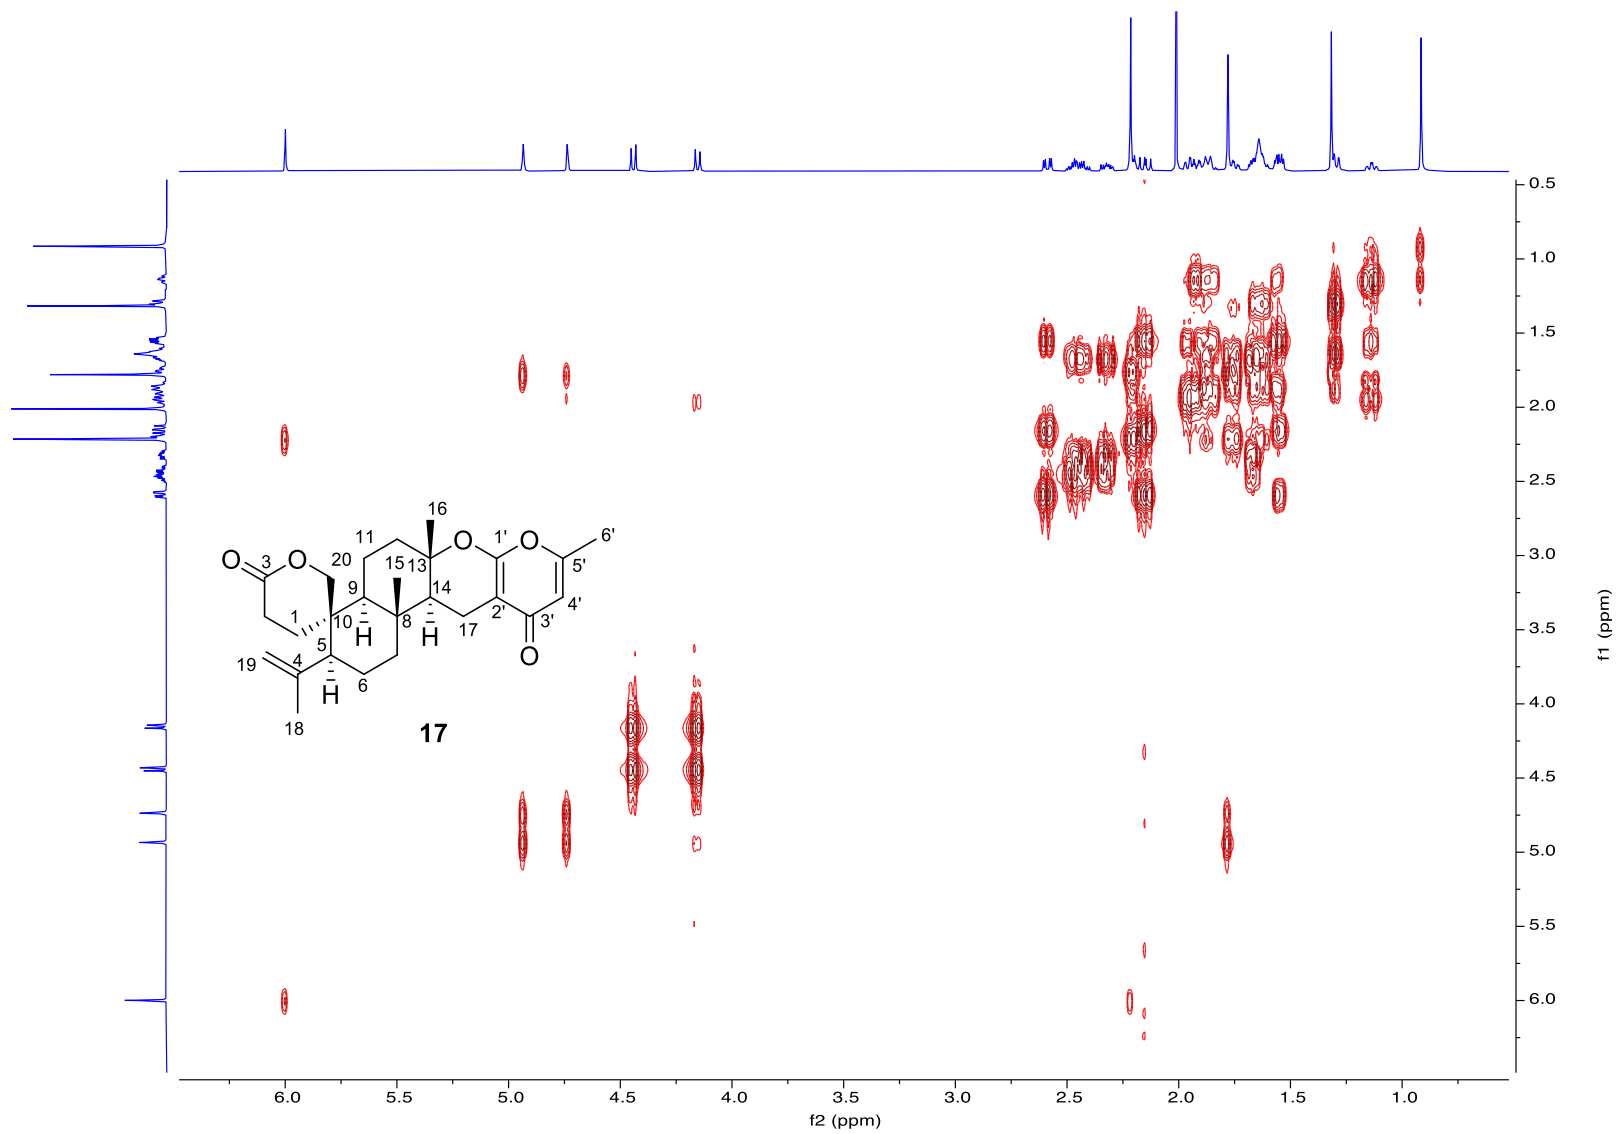

Figure S47.  $^1\text{H}$ - $^1\text{H}$  COSY spectrum of **17**.

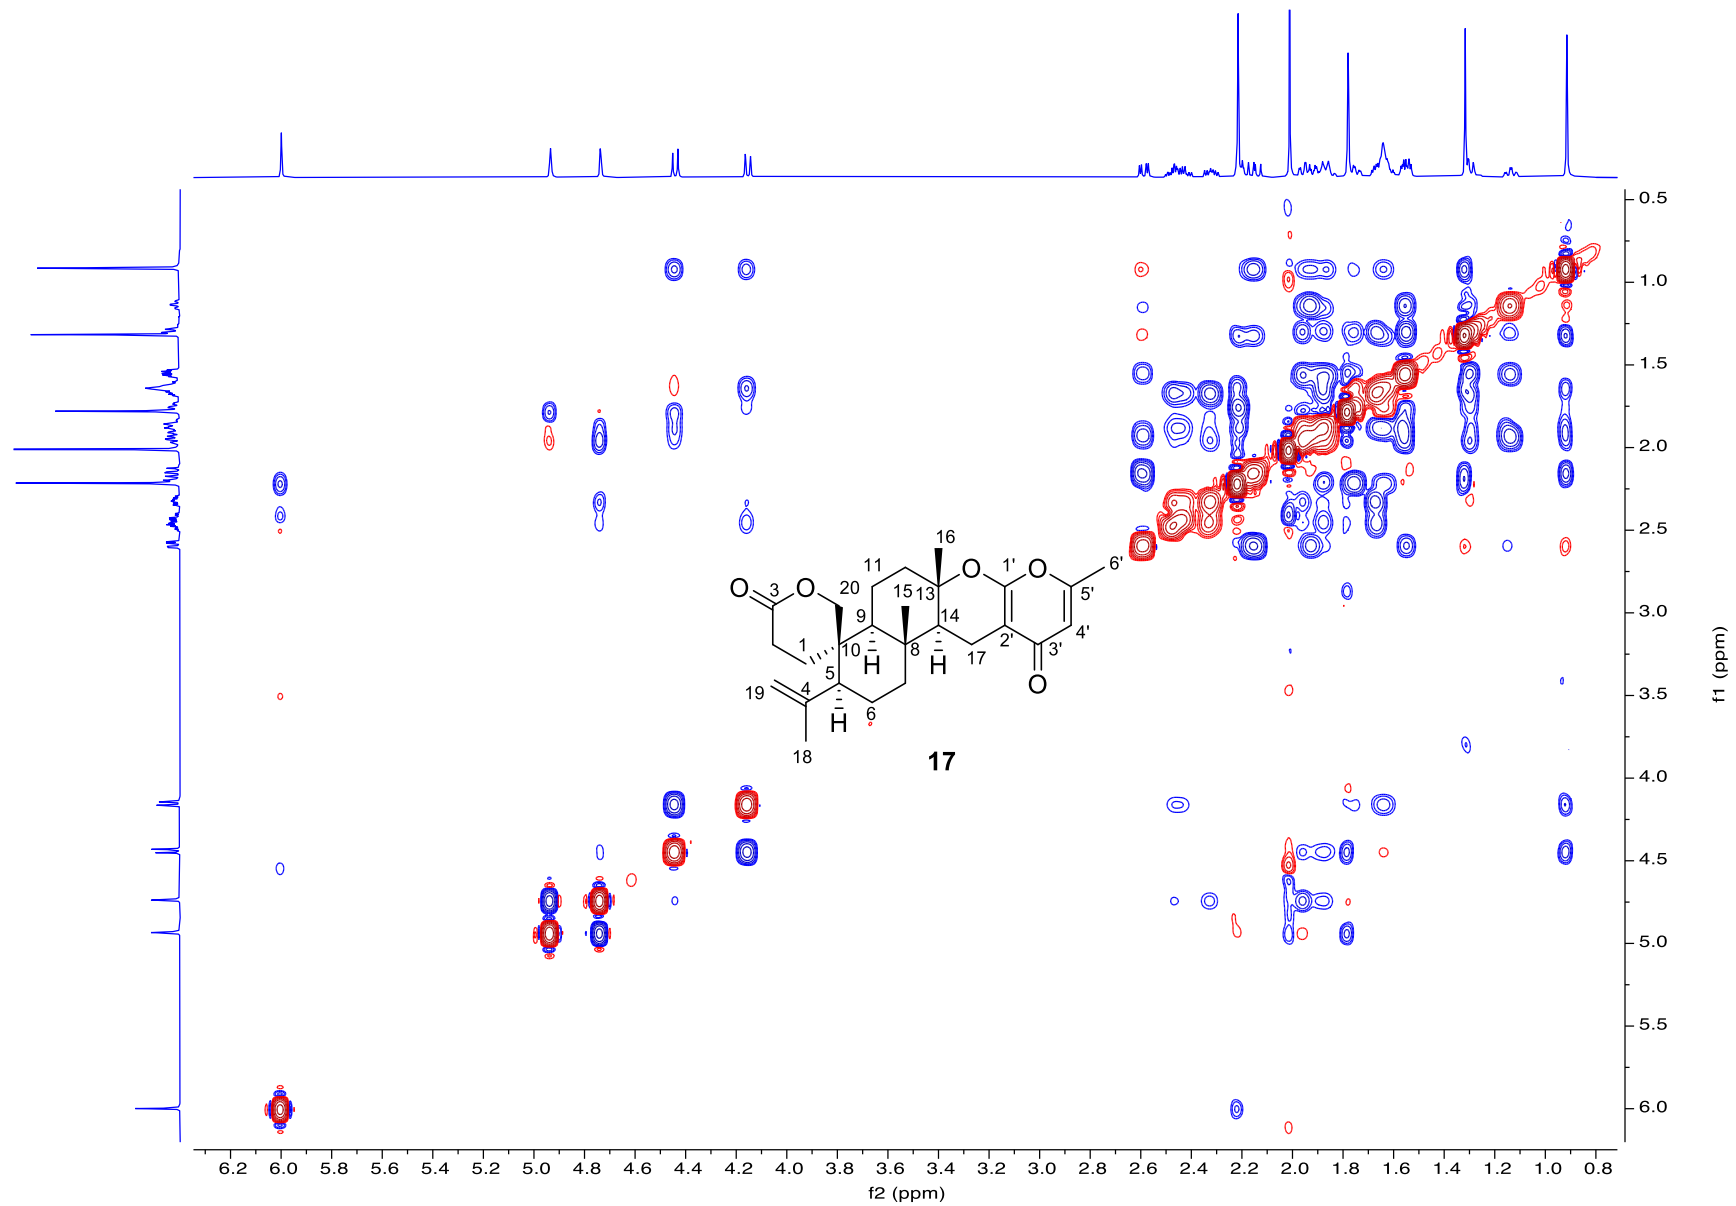

Figure S48. ROESY spectrum of **17**.

## Supplementary References

1. J. Paluka, K. Kanokmedhakul, M. Soyong, K. Soyong and S. Kanokmedhakul, *Fitoterapia*, 2019, **137**, 104257.
2. A. Boto, R. Freire, R. Hernández, E. Suárez and M. S. Rodríguez, *J. Org. Chem.*, 1997, **62**, 2975-2981.
